# Supplementary material for: Inhibition of Ezh2 redistributes bivalent domains within transcriptional regulators associated with WNT and Hedgehog pathways in osteoblasts
Source: PubMed Central journal article supplement (PMC10506106; doi:10.1016/j.jbc.2023.105155), 2023-08-11
Supplement: mmc1.pdf [file mmc1.pdf]

# **Inhibition of the epigenetic regulator Ezh2 redistributes bivalent domains within transcriptional regulators associated with WNT and Hedgehog pathways in osteoblasts**

Margarita E. Carrasco<sup>1</sup>, Roman Thaler<sup>1</sup>, Gino Nardocci<sup>2</sup>, Amel Dudakovic<sup>1,3#</sup>, Andre J van Wijnen<sup>4#</sup>

<sup>1</sup>Department of Orthopedic Surgery, Mayo Clinic, Rochester, MN, USA

<sup>2</sup>Universidad de los Andes, Santiago, Chile

<sup>3</sup>Department of Biochemistry and Molecular Biology, Mayo Clinic, Rochester, MN, USA

<sup>4</sup>Department of Biochemistry, University of Vermont, Burlington, VT, USA

**Figure S1:** Doses-response of Ezh2 inhibition by EPZ6438 in MC3T3 pre-osteoblasts.

**Figure S2:** Western Blot quantification of Ezh2 inhibition by EPZ6438 in MC3T3 cells.

**Figure S3:** Ezh2 inhibition by EPZ6438 enhances osteogenic differentiation of primary mouse pre-osteoblast cells.

**Figure S4:** Differential binding analysis of H3K27me3 and H3K4me3 ChIP-seq peak data.

**Figure S5:** Graphical representation of the fold change of H3K27me3 and H3K4me3 enrichment in relationship with the genomic distribution.

**Figure S6:** Western Blot quantification of Ezh2 inhibition and disruption of WNT and cAMP pathway.

**Figure S7:** Alizarin Red quantification of pro-osteogenic effects induced by Ezh2 inhibition are enhanced by disruption of WNT and cAMP pathway.

**Figure S8:** Osteogenic effects induced by Ezh2 inhibition are not changed by simultaneous disruption of WNT and cAMP pathway.

**Figure S9:** Silencing of Gli1 increases mineralization of MC3T3 pre-osteoblast.

**Figure S10:** H3K27me3 and H3K4me3 ChIP-seq.

**Figure S11:** Representative electropherograms used for DNA fragmentation quality analysis of ChIP-seq samples on Fragment Analyzer.

**Figure S12:** Representative electropherograms used for RNA quality analysis of total RNA for each RNA-seq sample on Fragment Analyzer.

**Figure S13:** Schematic representation of ChIP-seq protocol.

**Figure S14:** Schematic representation of RNA-seq protocol steps.

**Figure S15:** RNA-seq differential gene expression analysis using DESeq2.

**Table S1:** EPZ6438-induced genes listed in figure 3E that exhibited change in gene expression ( $FC > 5$ ) by RNA-seq that correlated with a reduction in H3K27me3 and presence or increase in H3K4me3 by K-means clustering.

**Table S2:** EPZ6438-induced genes listed in figure 3E that exhibited change in gene expression ( $5 < FC > 2$ ) by RNA-seq that correlated with a reduction in H3K27me3 and presence or increase in H3K4me3 by K-means clustering.

**Table S3:** EPZ6438-induced genes listed in figure 3E that exhibited change in gene expression ( $2 < FC > 1.2$ ) by RNA-seq that correlated with a reduction in H3K27me3 and presence or increase in H3K4me3 by K-means clustering.

**Table S4:** List of primers used in this study.

**Table S5:** List of antibodies used in this study.

**A**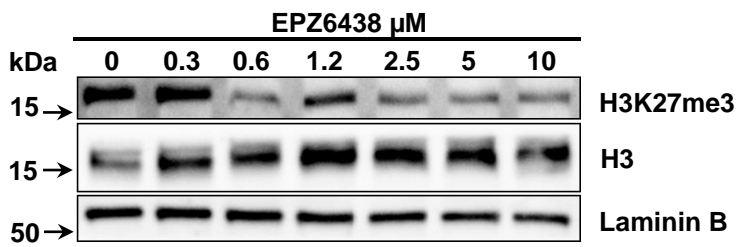**B**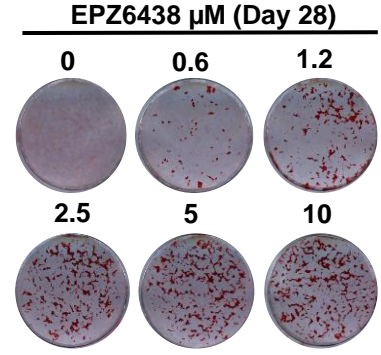

**Figure S1.** Dose-response of Ezh2 inhibition by EPZ6438 in MC3T3 pre-osteoblasts. Osteogenic differentiation was induced one day after plating. Vehicle and various EPZ6438 concentrations were added on the first day and removed on the third of differentiation. Western blot analysis on day three (A) and Alizarin red staining on day 28 (B).

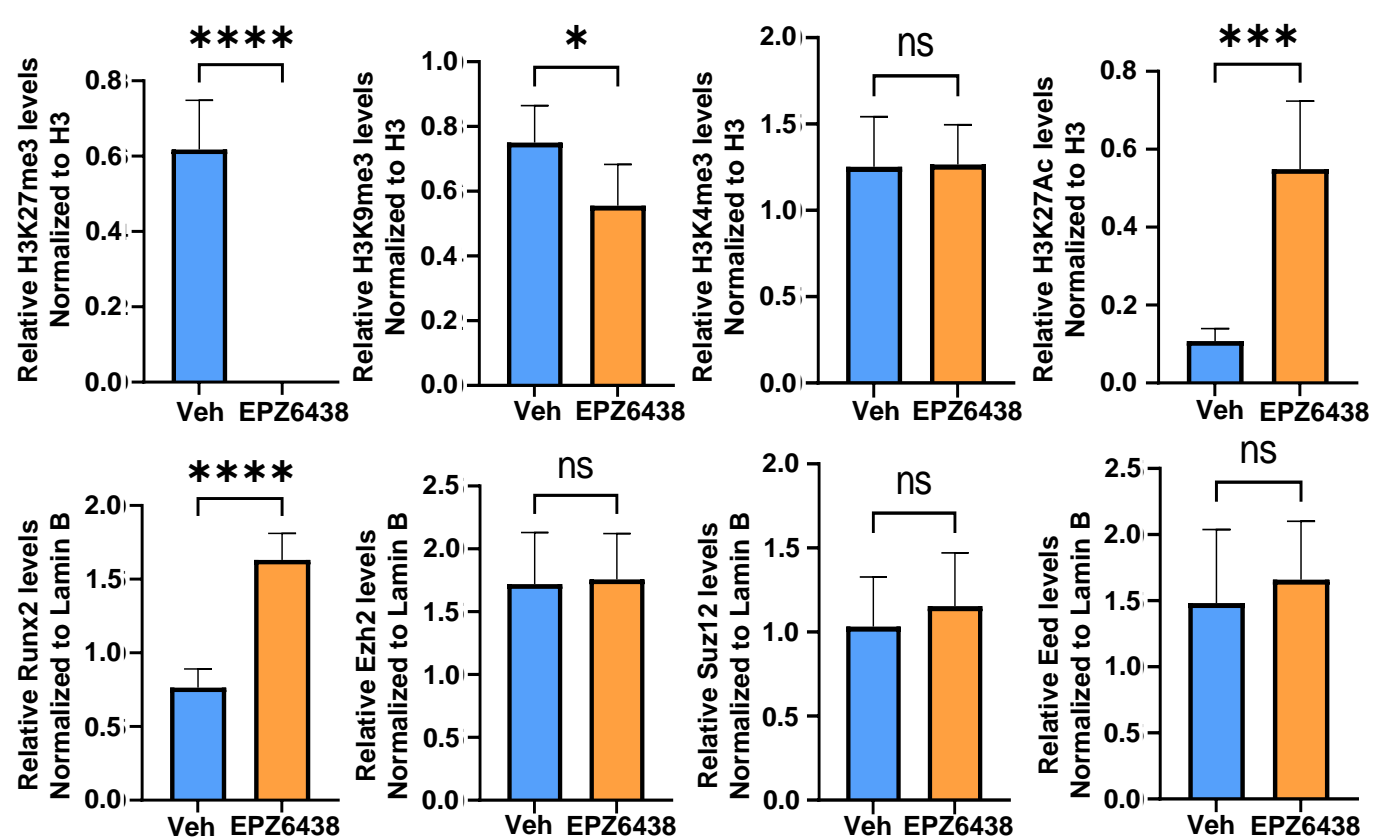

**Figure S2.** Western Blot quantification of Ezh2 inhibition by EPZ6438 in MC3T3 cells. Quantification and statistical analysis of protein bands shown in Figure 1C. All error bars represent mean  $\pm$  SD of three experimental replicates. (ns = not significant, \* =  $p \leq 0.05$ , \*\* =  $p \leq 0.01$ , \*\*\* =  $p \leq 0.001$ , \*\*\*\* =  $p \leq 0.0001$ ).

A

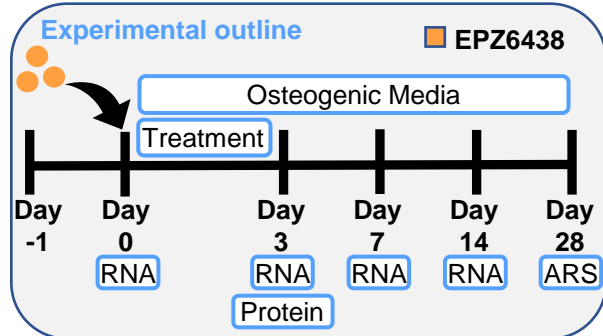

B

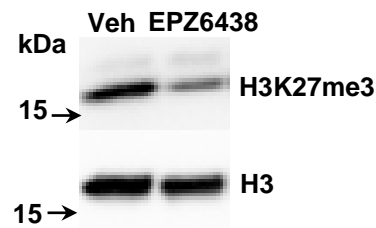

C

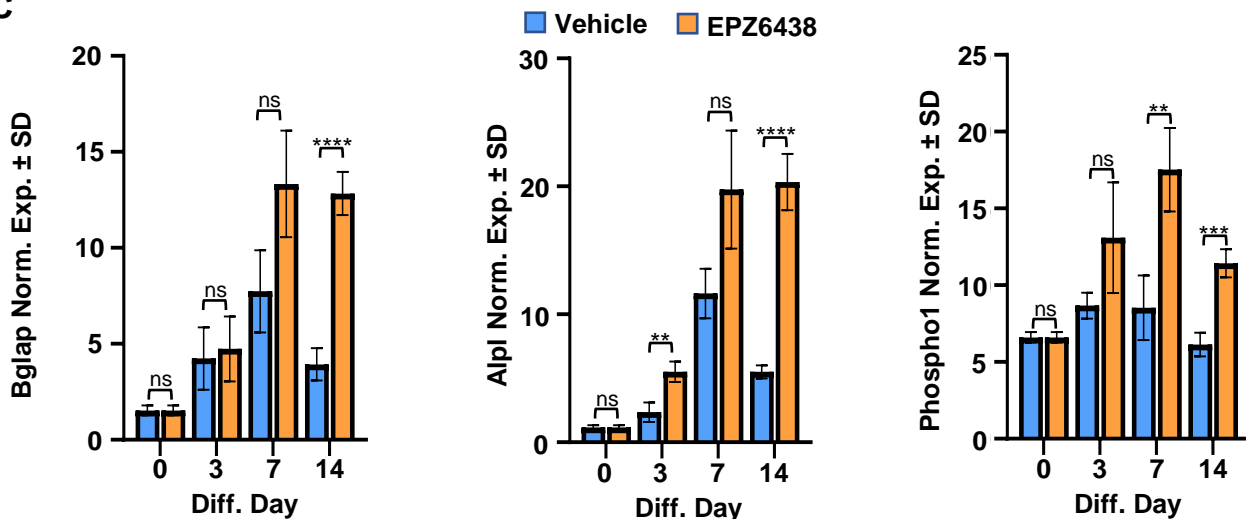

**Figure S3.** Ezh2 inhibition by EPZ6438 enhances osteogenic differentiation of primary mouse pre-osteoblast cells. Cells were treated with 2.5  $\mu$ M EPZ6438 one day after plating and evaluated by Western blot and RT-qPCR analysis as shown (A). Western blotting analysis on day 3 (B). RT-qPCR analysis for bone-related markers relative to Gapdh (set at 100) as indicated time points (n = 3) (C). All error bars represent  $\pm$  SD of three experimental replicates. (ns = not significant, \* =  $p \leq 0.05$ , \*\* =  $p \leq 0.01$ , \*\*\* =  $p \leq 0.001$ , \*\*\*\* =  $p \leq 0.0001$ ).

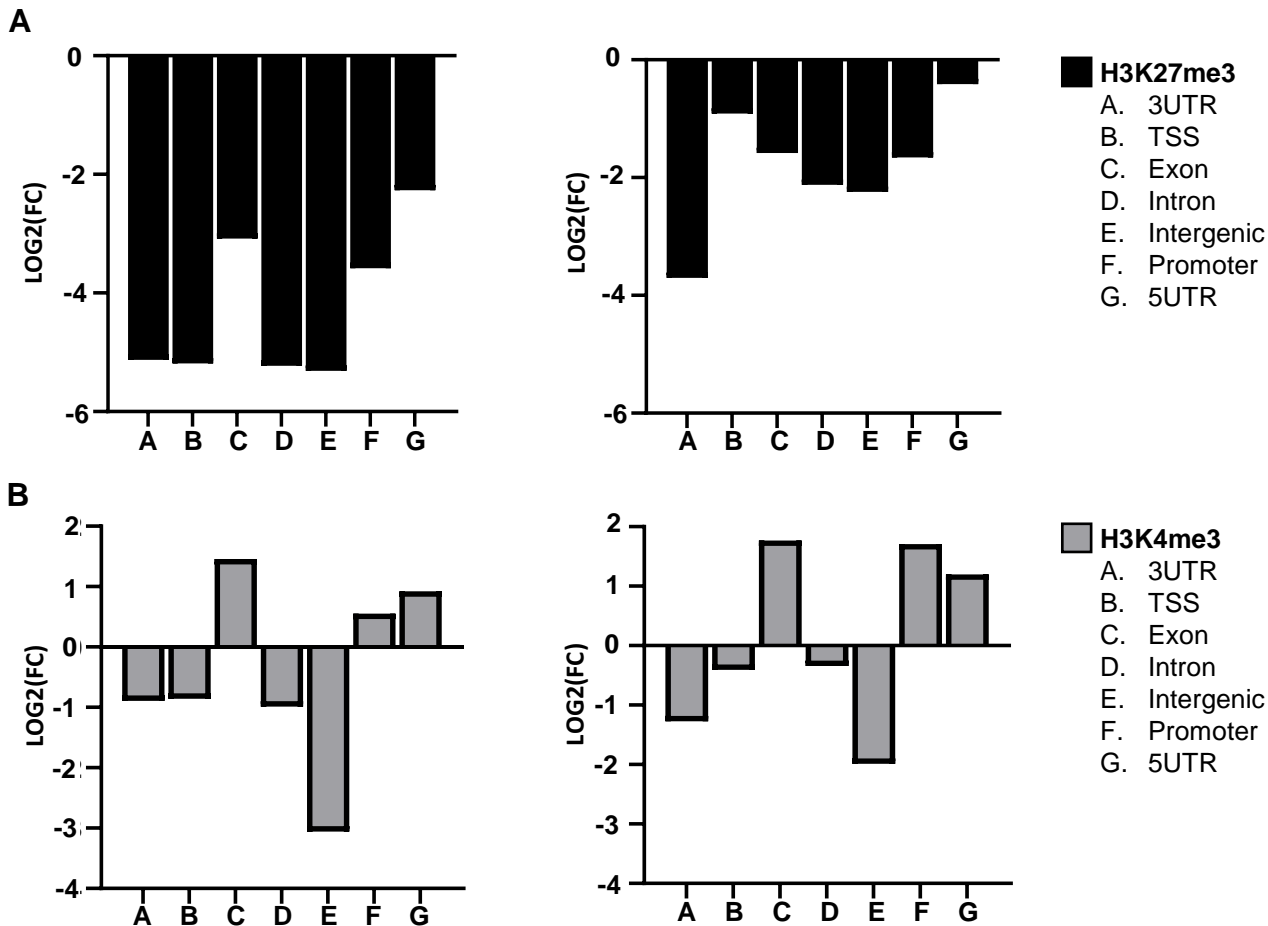

**Figure S4.** Graphical representation of the fold change (EPZ6438 versus Veh) of H3K27me3 (A) and H3K4me3 enrichment (B) in relationship with the genomic distribution. ChIP-Seq replicates for each modification are shown.

**A** Veh vs EPZ6438 (19454 FDR<=0.05)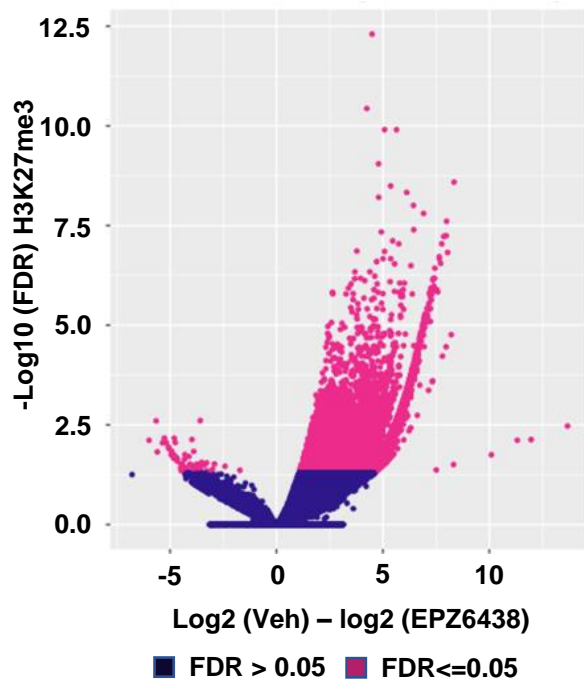**C**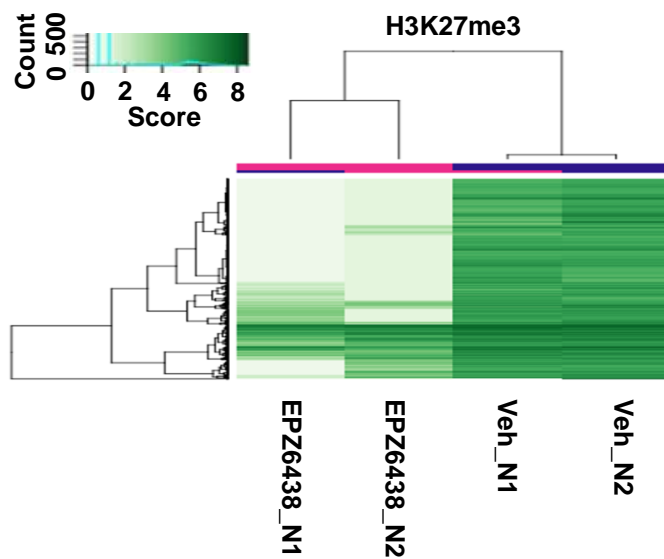**B**

Veh vs EPZ6438 (2630 FDR&lt;=0.05)

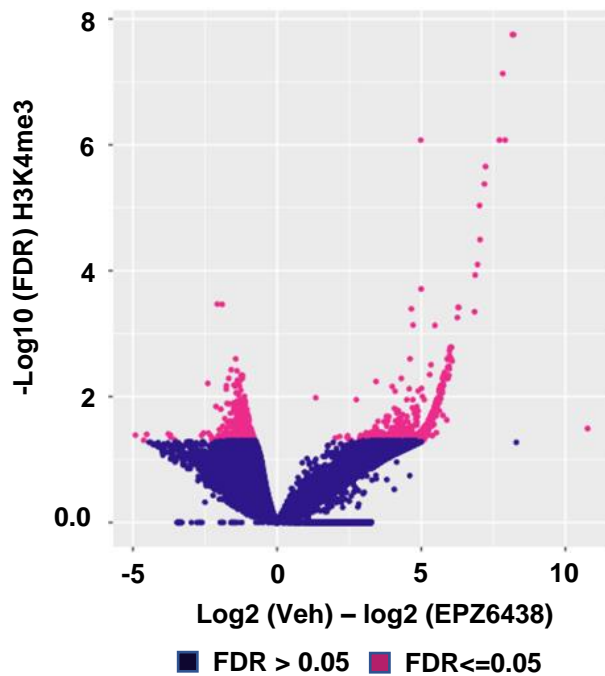**D**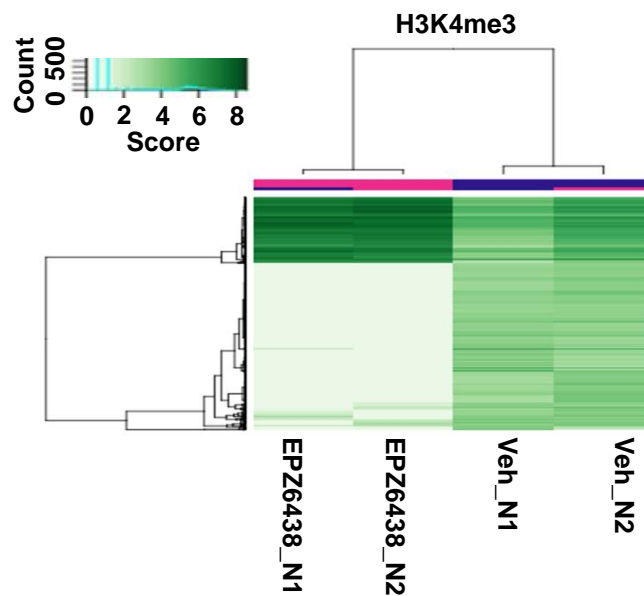

**Figure S5.** Differential binding analysis of H3K27me3 and H3K4me3 ChIP-seq peak data. Volcano plots highlight significantly differentially bound sites and show their fold changes and the confidence statistic (FDR or p-value) is shown on a negative log scale, helping visualize the relationship between the magnitude of fold changes and the confidence that sites are differentially bound for H3K27me3 (A) and H3K4me3 (B). Binding affinity heatmap showing affinities for differentially bound H3K27me3 (C) and H3K4me3 (D) sites. The figure shows the affinities and clustering of the differentially bound sites (rows), as well as the sample clustering (columns).

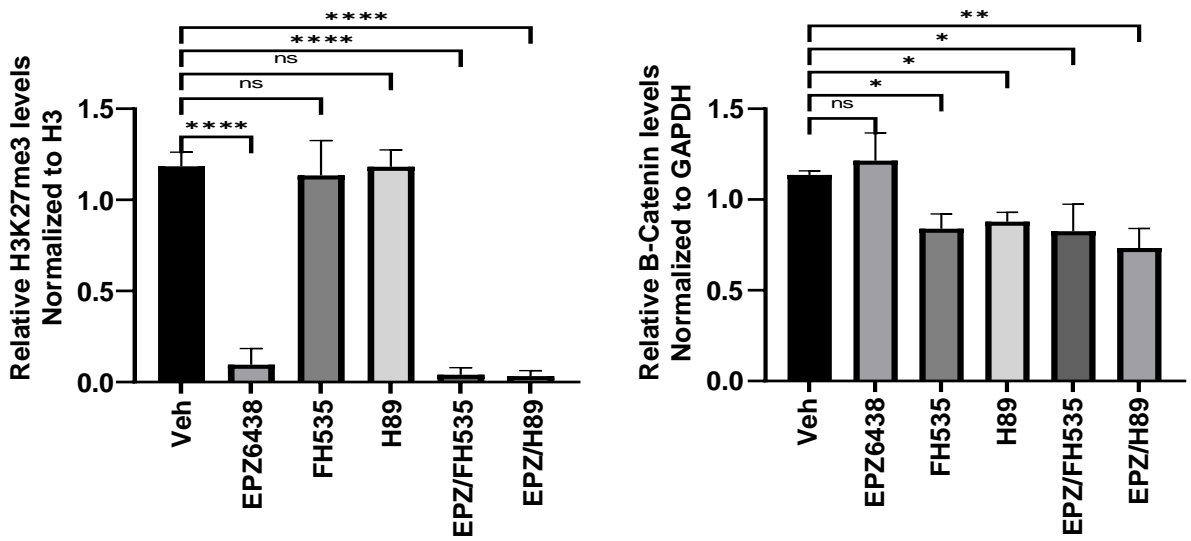

**Figure S6.** Western blot quantification of Ezh2 inhibition and disruption of WNT and cAMP pathway. Quantification and statistical analysis of relevant protein bands (H3K27me3 and B-catenin) shown in Figure 4B. All error bars represent  $\pm$  SD of three experimental replicates. (ns = not significant, \* =  $p \leq 0.05$ , \*\* =  $p \leq 0.01$ , \*\*\* =  $p \leq 0.001$ , \*\*\*\* =  $p \leq 0.0001$ ).



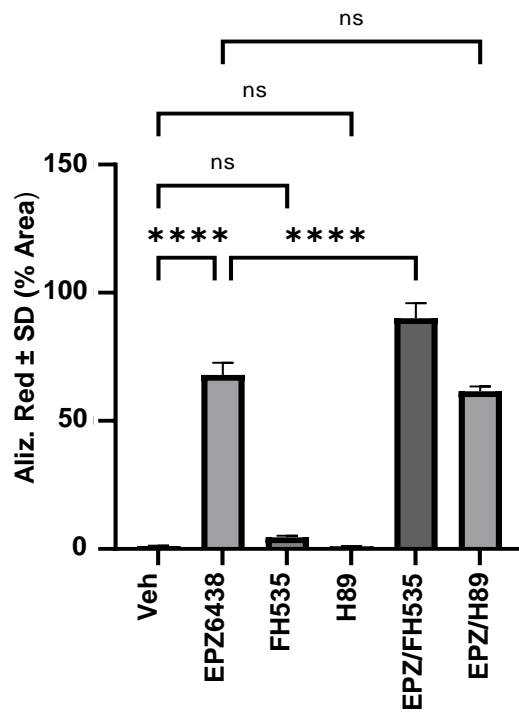

**Figure S7.** Alizarin Red quantification of pro-osteogenic effects induced by Ezh2 inhibition are enhanced by disruption of the WNT pathway. Quantification and statistical analysis of Alizarin red staining on day 32 (shown in Figure 4D). All error bars represent  $\pm$  SD of three experimental replicates. (ns = not significant, \* =  $p \leq 0.05$ , \*\* =  $p \leq 0.01$ , \*\*\* =  $p \leq 0.001$ , \*\*\*\* =  $p \leq 0.0001$ ).

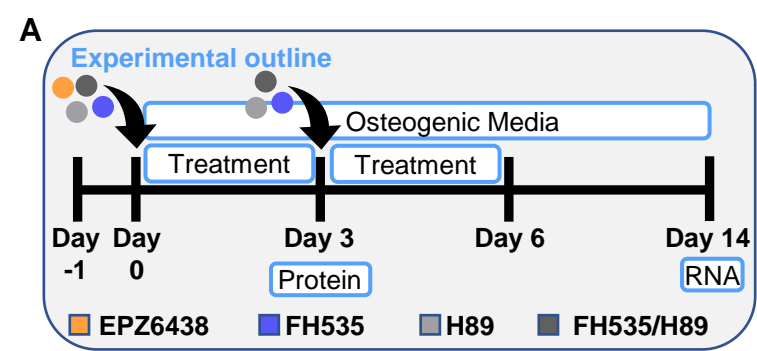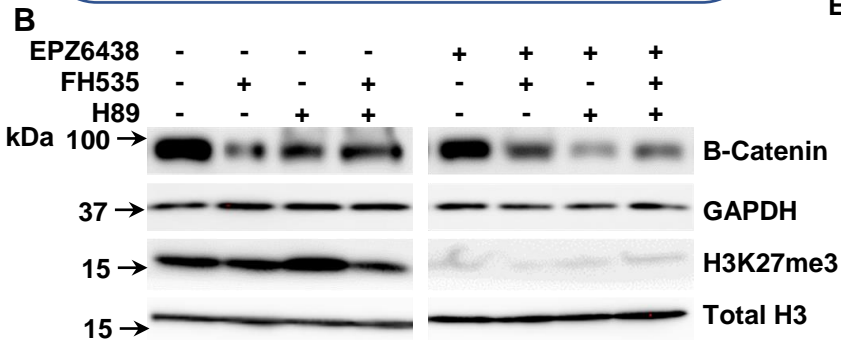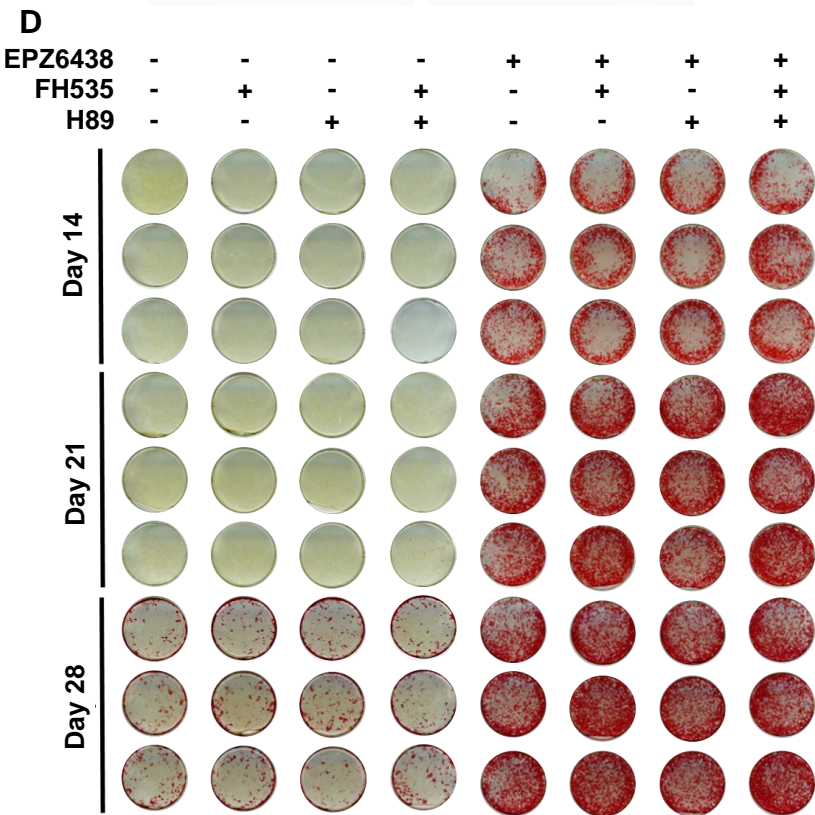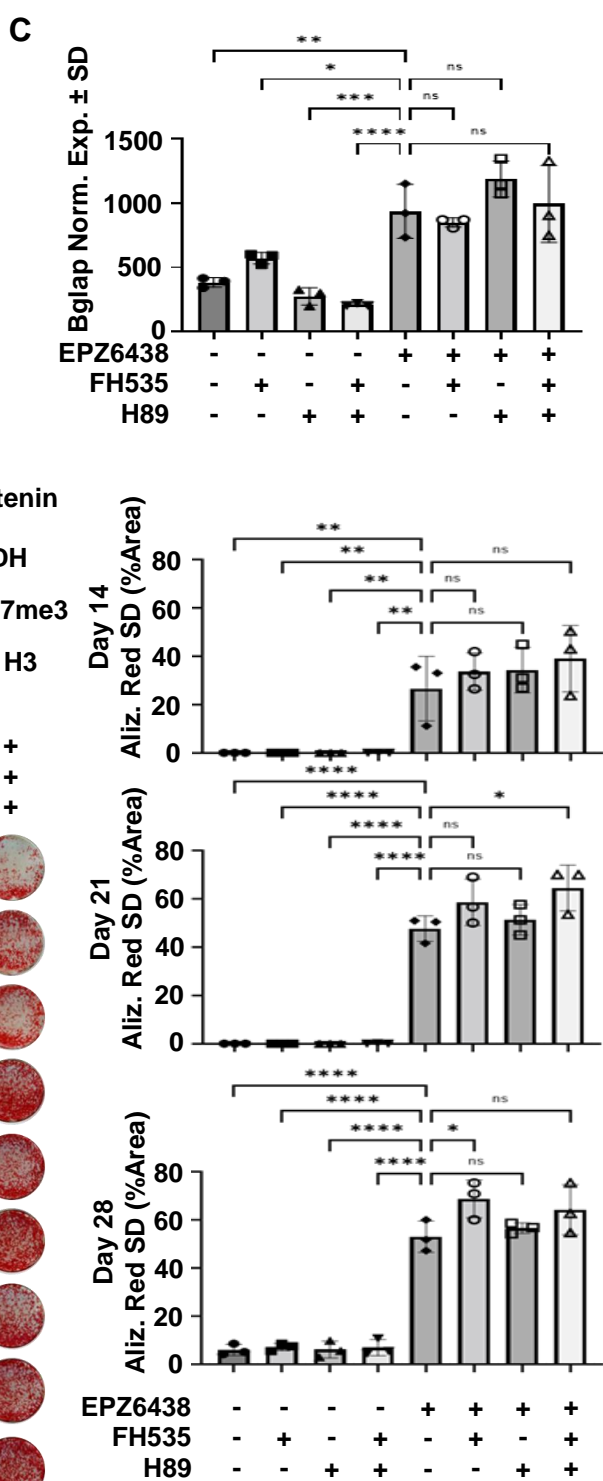

**Figure S8.** Osteogenic effects induced by Ezh2 inhibition are not changed by simultaneous disruption of WNT and cAMP pathway. Diagram of the experimental protocol for treatment of MC3T3 with vehicle (Veh) or 2.5  $\mu$ M EPZ6438 with or without 5  $\mu$ M FH535 or H89 shown in panels B-D (A). Western blotting analysis on day 3 (B). RT-qPCR analysis for bone-related markers relative to Gapdh (set at 100) on day 14 (C). Alizarin red staining on day 14, 21, 28 (D). All error bars represent  $\pm$  SD of three experimental replicates. (ns = not significant, \* =  $p \leq 0.05$ , \*\* =  $p \leq 0.01$ , \*\*\* =  $p \leq 0.001$ , \*\*\*\* =  $p \leq 0.0001$ ).

**A**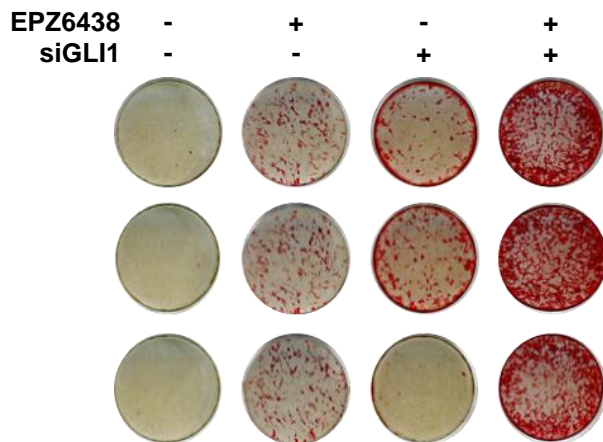

**Figure S9.** Silencing of Gli1 increases mineralization of MC3T3 pre-osteoblast. Diagram of the experimental protocol for treatment of MC3T3 siCtrl or siGli1 with vehicle (Veh) or 2.5  $\mu$ M EPZ6438 is shown in Fig 5A. Alizarin red staining on day 26. All error bars represent  $\pm$  SD of three experimental replicates. (ns = not significant, \* =  $p \leq 0.05$ , \*\* =  $p \leq 0.01$ , \*\*\* =  $p \leq 0.001$ , \*\*\*\* =  $p \leq 0.0001$ ).

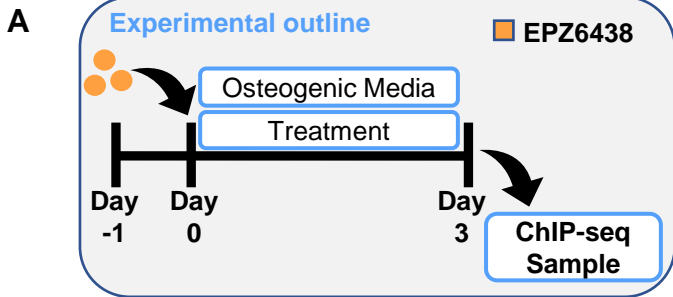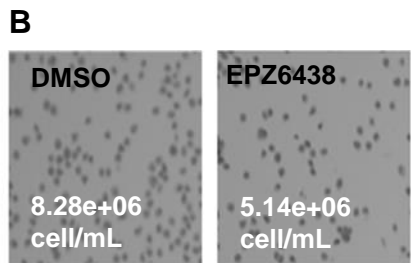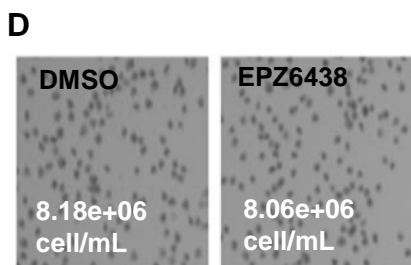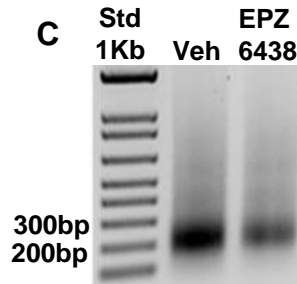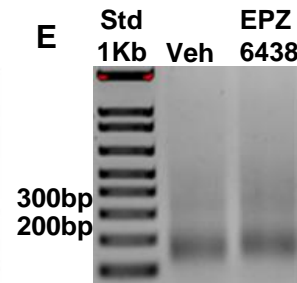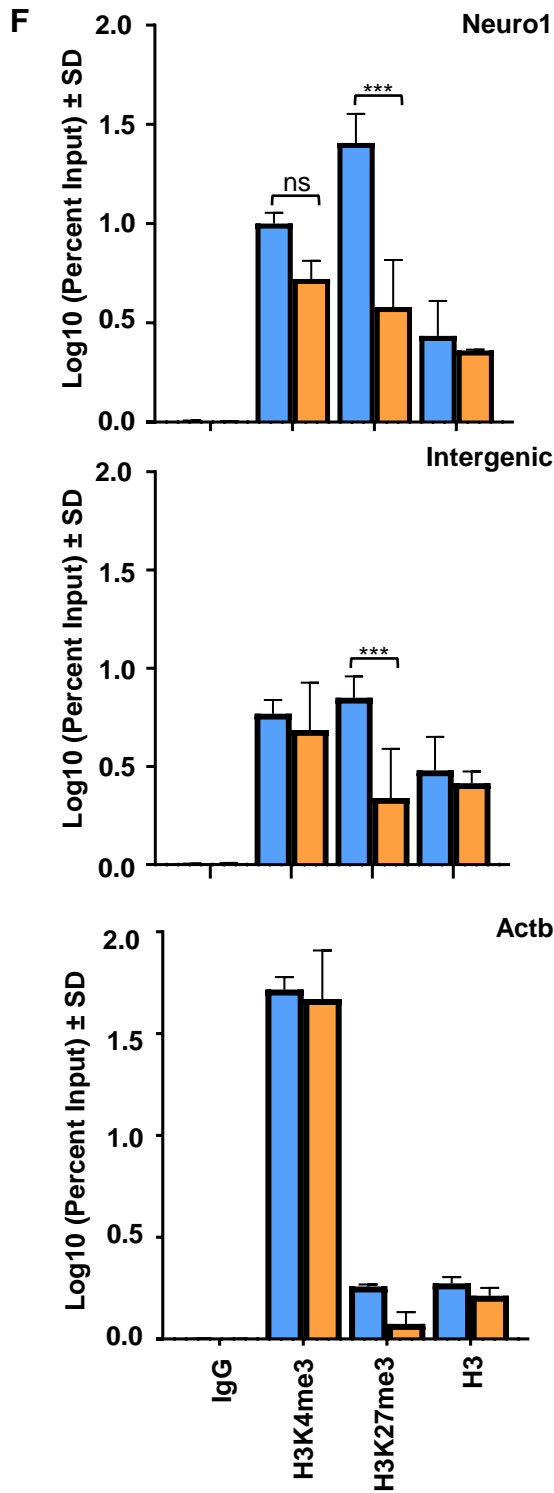

**Figure S10.** H3K27me3 and H3K4me3 ChIP-seq. Diagram of the experimental protocol for treatment of MC3T3 with vehicle (Veh) or 2.5  $\mu$ M EPZ6438 shown in panel B-F (A). Cell numbers for the endpoint analysis and electrophoresis in 1% agarose gel to visualize chromatin shearing after sonication in first (B and C) and second (D and E) replicates. ChIP-qPCR analysis of Neuro1 promoter, an intragenic region, and Actb relative to Input (F). All error bars represent  $\pm$  SD of two experimental replicates. (ns = not significant, \* =  $p \leq 0.05$ , \*\* =  $p \leq 0.01$ , \*\*\* =  $p \leq 0.001$ , \*\*\*\* =  $p \leq 0.0001$ ).

**D3\_Veh\_1\_H3K4me3**

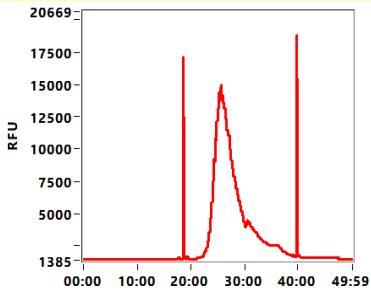

**D3\_Veh\_1\_H3K27me3**

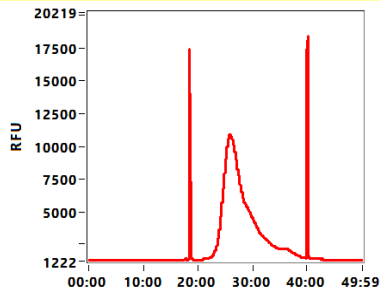

**D3\_Veh\_1\_Input**

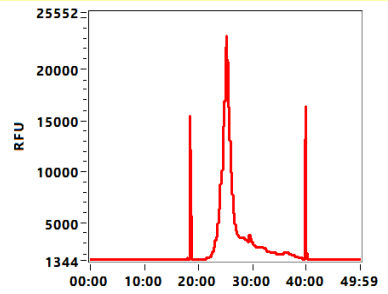

**D3\_EPZ6438\_1\_H3K4me3**

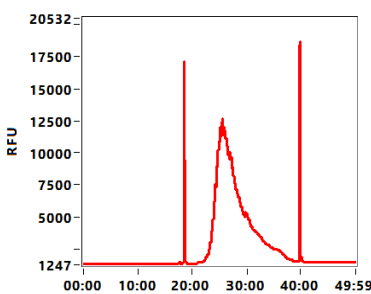

**D3\_EPZ6438\_1\_H3K27me3**

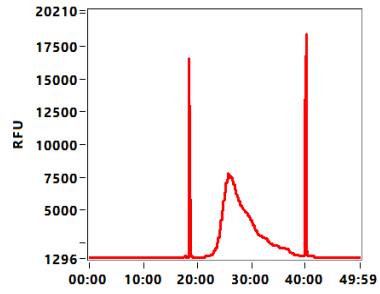

**D3\_EPZ6438\_1\_Input**

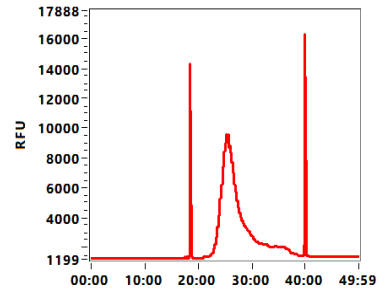

**D3\_Veh\_2\_H3K4me3**

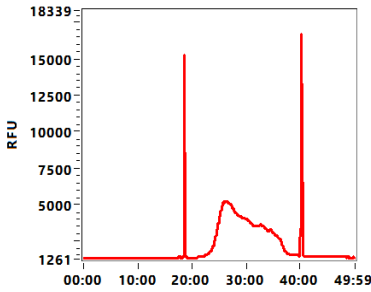

**D3\_Veh\_2\_H3K27me3**

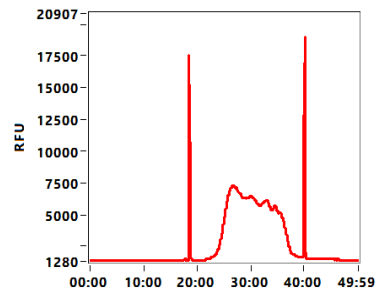

**D3\_Veh\_2\_Input**

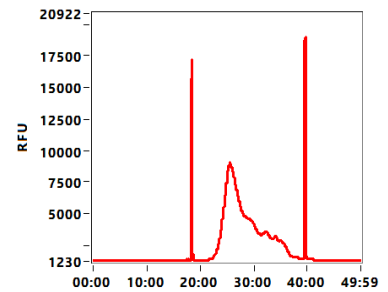

**D3\_EPZ6438\_2\_H3K4me3**

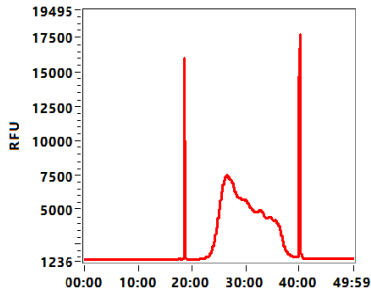

**D3\_EPZ6438\_2\_H3K27me3**

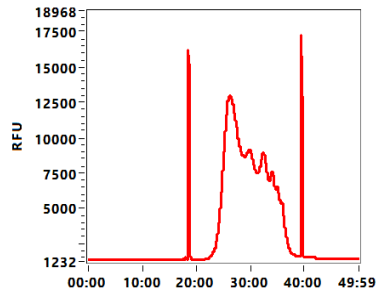

**D3\_EPZ6438\_2\_Input**

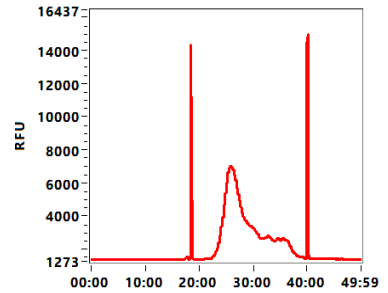

**Figure S11.** Representative electropherograms used for DNA fragmentation quality analysis of ChIP-seq samples on Fragment Analyzer.

A

MC3T3\_D3\_Veh\_1

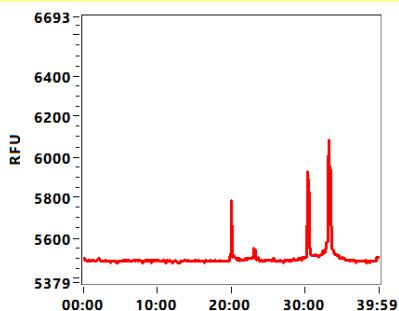

MC3T3\_D3\_Veh\_2

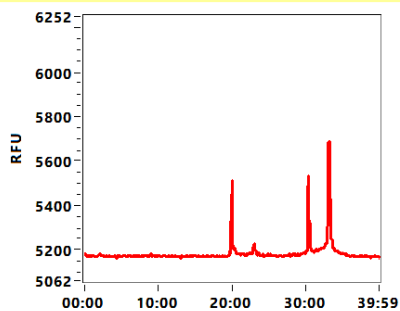

MC3T3\_D3\_Veh\_3

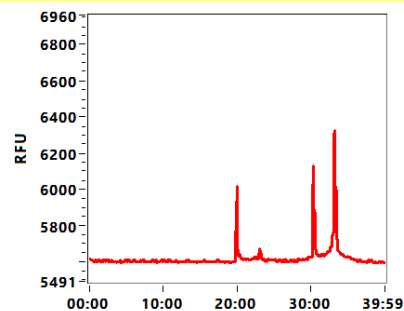

MC3T3\_D3\_EPZ6438\_1

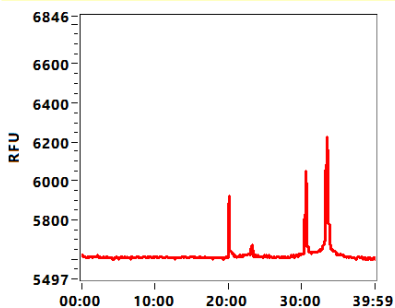

MC3T3\_D3\_EPZ6438\_2

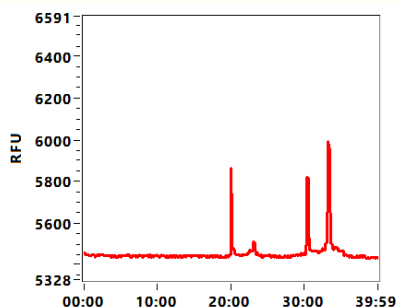

MC3T3\_D3\_EPZ6438\_3

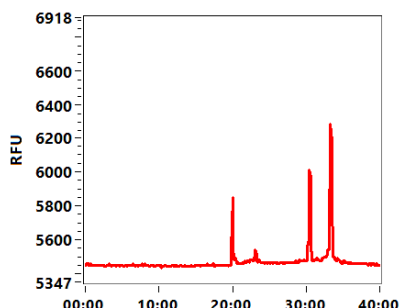

Ladder

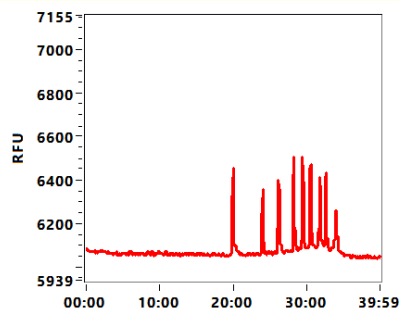

Ladder

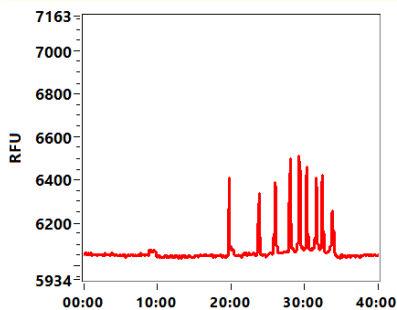

B

|                | Veh_1    | Veh_2   | Veh_3    | EPZ6438_1 | EPZ6438_2 | EPZ6438_3 |
|----------------|----------|---------|----------|-----------|-----------|-----------|
| <b>TIC</b>     | 57.3434  | 38.3278 | 61.6541  | 51.7872   | 34.2948   | 54.5146   |
| <b>TIM</b>     | 111.3040 | 81.0125 | 126.2136 | 111.0399  | 89.7076   | 130.1400  |
| <b>Conc.</b>   | 72.3576  | 50.9668 | 88.9587  | 76.1101   | 48.5064   | 83.0863   |
| <b>28S/18S</b> | 1.9      | 1.9     | 1.8      | 1.8       | 1.8       | 1.9       |
| <b>RQN</b>     | 10.0     | 10.0    | 9.8      | 9.7       | 10.0      | 9.2       |



**Figure S12.** Representative electropherograms used for RNA quality analysis of total RNA for each RNA-seq sample on Fragment Analyzer. The LM at 1 bp and UM at 6,000 bp are internal markers that are added to ensure proper sizing of samples. TIC: Total Integrated Concentration in ng/ $\mu$ L. Concentration of all detected peaks. TIM: Total Integrated Molarity in nmole/L. Molarity of all detected peaks. Total conc.: total concentration in ng/ $\mu$ L of sample. The RQN assists in assessing the presence or absence of degradation. RQN considers the entire electropherogram with scoring from 1 to 10, where 10 indicates the highest possible RNA quality.

**A**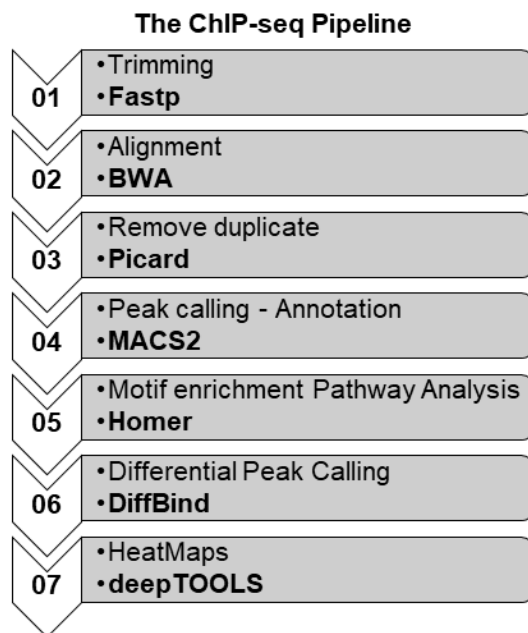**B**

| Treatment | Replicate | # of ChIP-seq Reads |            |            |
|-----------|-----------|---------------------|------------|------------|
|           |           | Input               | H3K4me3    | H3K27me3   |
| DMSO      | #1        | 60,724,722          | 71,359,676 | 64,012,591 |
| DMSO      | #2        | 48,669,870          | 66,088,717 | 53,592,704 |
| EPZ6438   | #1        | 70,540,229          | 60,255,417 | 59,096,653 |
| EPZ6438   | #2        | 67,704,031          | 62,113,823 | 68,267,493 |

**Figure S13.** Schematic representation of ChIP-seq protocol (A). Number of ChIP-Seq reads for each antibody (H3K4me3 and H3K27me3) and input from two treatment groups (DMSO and 2.5  $\mu$ M EPZ6438) and two biological replicates for each treatment group (B).

## The RNA-seq Pipeline

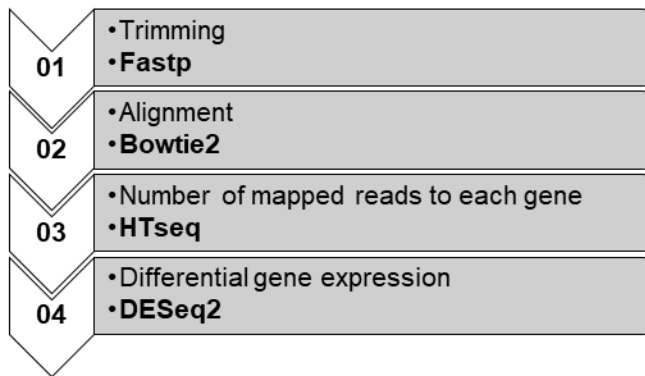

**Figure S14.** Schematic representation of RNA-seq protocol steps.

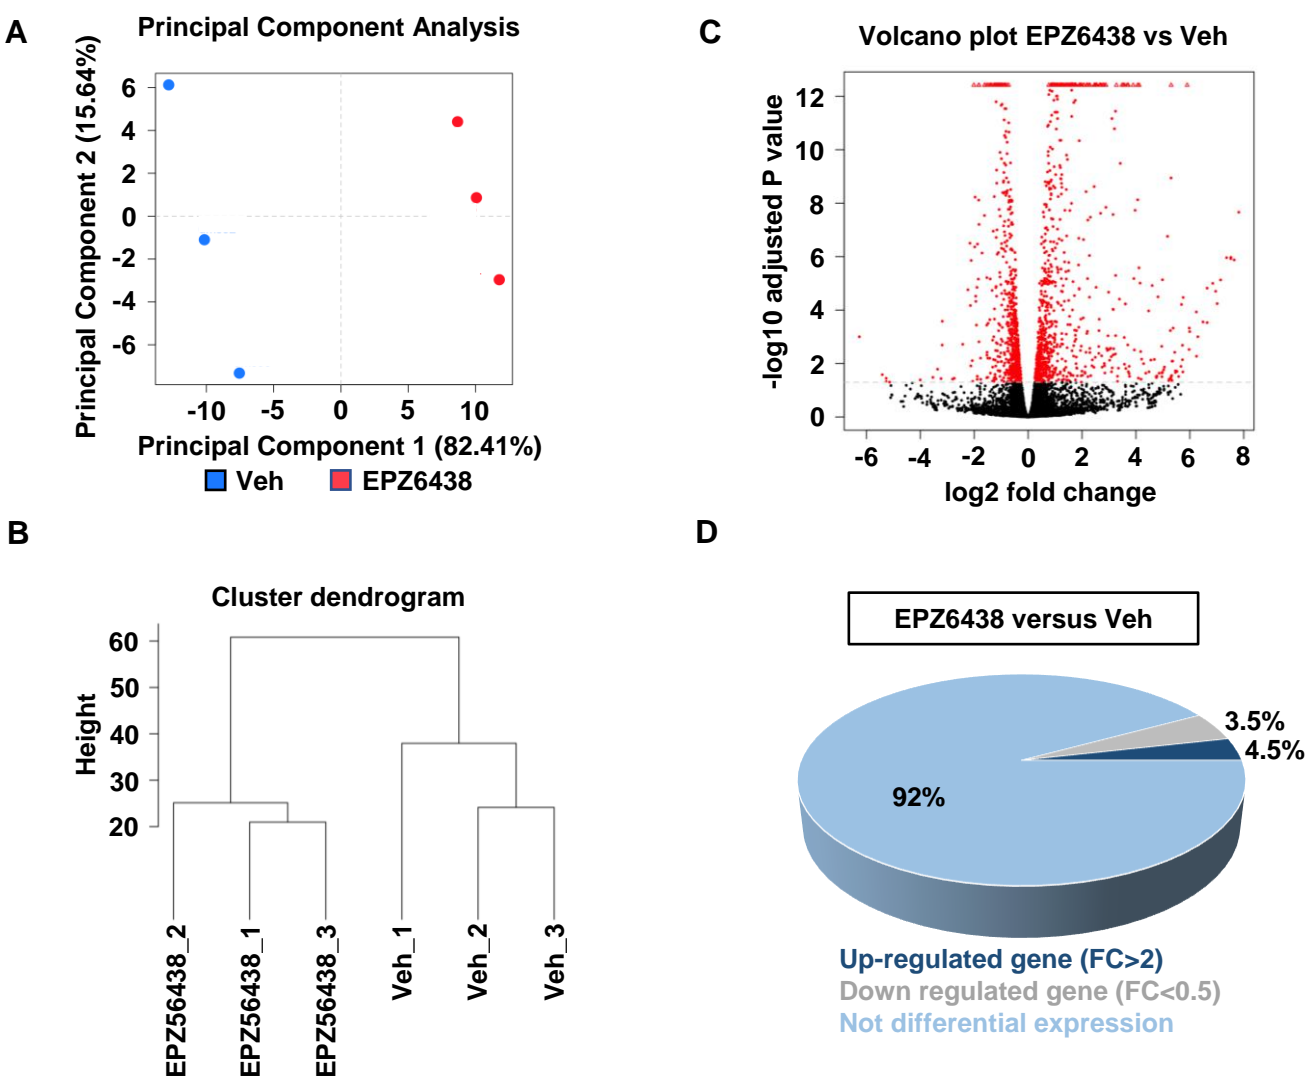

**Figure S15.** RNA-seq differential gene expression analysis using DESeq2. Principal component analysis (PCA) (A). Dendrogram of the RNA-seq samples (B). Volcano plot showing similar numbers of up and down-regulated genes (C). Graphic representation of the percentage of up and down regulated genes (D).

**Table S1:** EPZ6438-induced genes listed in figure 3E that exhibited change in gene expression (FC > 5) by RNA-seq that correlated with a reduction in H3K27me3 and presence or increase in H3K4me3 by K-means clustering.

| FC>5                                        |        |           |           |            |            |            |           |           |           |            |
|---------------------------------------------|--------|-----------|-----------|------------|------------|------------|-----------|-----------|-----------|------------|
| FC>5, H3K27me3 cluster 1                    |        |           |           |            |            |            |           |           |           |            |
| FC>5, H3K27me3 cluster 1, H3K4me3 cluster 2 |        |           |           |            |            |            |           |           |           |            |
| Id                                          | RNAseq | H3K27me3  | H3K4me3   | norm.dms01 | norm.dms02 | norm.dms03 | norm.epz1 | norm.epz2 | norm.epz3 | FoldChange |
| Colgalt2                                    | FC > 5 | cluster_1 | cluster_2 | 0          | 0          | 0          | 45        | 21        | 35        | 183.249    |
| Frat1                                       | FC > 5 | cluster_1 | cluster_2 | 0          | 0          | 2          | 18        | 25        | 32        | 38.796     |
| Lhx2                                        | FC > 5 | cluster_1 | cluster_2 | 7          | 1          | 1          | 21        | 36        | 22        | 9.45       |
| Wnt11                                       | FC > 5 | cluster_1 | cluster_2 | 11         | 4          | 6          | 32        | 64        | 72        | 7.92       |
| FC>5, H3K27me3 cluster 1, H3K4me3 cluster 3 |        |           |           |            |            |            |           |           |           |            |
| Id                                          | RNAseq | H3K27me3  | H3K4me3   | norm.dms01 | norm.dms02 | norm.dms03 | norm.epz1 | norm.epz2 | norm.epz3 | FoldChange |
| Adgrd1                                      | FC > 5 | cluster_1 | cluster_3 | 418        | 331        | 400        | 2088      | 2114      | 2118      | 5.504      |
| Asb4                                        | FC > 5 | cluster_1 | cluster_3 | 1          | 4          | 0          | 24        | 43        | 54        | 24.287     |
| Chn2                                        | FC > 5 | cluster_1 | cluster_3 | 0          | 0          | 1          | 69        | 99        | 73        | 225.356    |
| Cnksr1                                      | FC > 5 | cluster_1 | cluster_3 | 1          | 1          | 0          | 17        | 16        | 3         | 18.271     |
| Cryba2                                      | FC > 5 | cluster_1 | cluster_3 | 0          | 2          | 2          | 13        | 23        | 23        | 15.356     |
| Cyp17a1                                     | FC > 5 | cluster_1 | cluster_3 | 1          | 0          | 0          | 6         | 28        | 10        | 41.151     |
| E330013P04R                                 | FC > 5 | cluster_1 | cluster_3 | 1          | 0          | 0          | 43        | 22        | 59        | 115.276    |
| Enpp5                                       | FC > 5 | cluster_1 | cluster_3 | 0          | 0          | 0          | 24        | 6         | 25        | 99.873     |
| Epas1                                       | FC > 5 | cluster_1 | cluster_3 | 5          | 23         | 17         | 130       | 138       | 162       | 9.462      |
| Frm pd1                                     | FC > 5 | cluster_1 | cluster_3 | 0          | 0          | 0          | 7         | 7         | 8         | 40.084     |
| Hoxb13                                      | FC > 5 | cluster_1 | cluster_3 | 3          | 4          | 1          | 96        | 108       | 111       | 39.577     |
| Hpse                                        | FC > 5 | cluster_1 | cluster_3 | 68         | 70         | 68         | 920       | 763       | 777       | 11.915     |
| Ifnlr1                                      | FC > 5 | cluster_1 | cluster_3 | 7          | 3          | 18         | 39        | 77        | 55        | 6.184      |
| Ikzf4                                       | FC > 5 | cluster_1 | cluster_3 | 0          | 0          | 0          | 21        | 13        | 15        | 89.724     |
| Nsg2                                        | FC > 5 | cluster_1 | cluster_3 | 0          | 0          | 0          | 6         | 13        | 5         | 44.202     |
| Ooep                                        | FC > 5 | cluster_1 | cluster_3 | 1          | 0          | 0          | 10        | 36        | 22        | 63.745     |
| Prkch                                       | FC > 5 | cluster_1 | cluster_3 | 7          | 13         | 1          | 87        | 41        | 51        | 8.89       |
| Rufy4                                       | FC > 5 | cluster_1 | cluster_3 | 0          | 0          | 0          | 10        | 1         | 15        | 47.952     |
| Scn1a                                       | FC > 5 | cluster_1 | cluster_3 | 0          | 0          | 0          | 24        | 21        | 24        | 124.3      |
| Slc36a2                                     | FC > 5 | cluster_1 | cluster_3 | 8          | 5          | 10         | 73        | 100       | 68        | 10.701     |
| Slc6a4                                      | FC > 5 | cluster_1 | cluster_3 | 22         | 22         | 15         | 265       | 230       | 261       | 13.102     |
| Smt n12                                     | FC > 5 | cluster_1 | cluster_3 | 1          | 0          | 4          | 59        | 32        | 16        | 22.172     |
| Steap3                                      | FC > 5 | cluster_1 | cluster_3 | 12         | 31         | 45         | 349       | 358       | 300       | 11.164     |
| Tbx4                                        | FC > 5 | cluster_1 | cluster_3 | 2          | 1          | 4          | 37        | 39        | 42        | 17.294     |
| Tlx1                                        | FC > 5 | cluster_1 | cluster_3 | 5          | 1          | 4          | 25        | 22        | 38        | 9.489      |
| Wf dc6a                                     | FC > 5 | cluster_1 | cluster_3 | 1          | 0          | 1          | 14        | 11        | 9         | 17.044     |
| FC>5, H3K27me3 cluster 1, H3K4me3 cluster 4 |        |           |           |            |            |            |           |           |           |            |
| Id                                          | RNAseq | H3K27me3  | H3K4me3   | norm.dms01 | norm.dms02 | norm.dms03 | norm.epz1 | norm.epz2 | norm.epz3 | FoldChange |
| 5730559C18R                                 | FC > 5 | cluster_1 | cluster_4 | 2          | 2          | 1          | 55        | 85        | 55        | 39.503     |
| Car12                                       | FC > 5 | cluster_1 | cluster_4 | 5          | 4          | 4          | 30        | 15        | 25        | 5.436      |
| Dbh                                         | FC > 5 | cluster_1 | cluster_4 | 3          | 5          | 3          | 43        | 37        | 11        | 8.334      |
| Eln                                         | FC > 5 | cluster_1 | cluster_4 | 3          | 34         | 22         | 320       | 503       | 245       | 17.813     |
| Fam167a                                     | FC > 5 | cluster_1 | cluster_4 | 6          | 27         | 8          | 205       | 218       | 267       | 16.732     |
| Gng2                                        | FC > 5 | cluster_1 | cluster_4 | 11         | 23         | 8          | 125       | 119       | 115       | 8.631      |
| Matn1                                       | FC > 5 | cluster_1 | cluster_4 | 0          | 1          | 0          | 17        | 12        | 4         | 31.39      |

|                                                       |               |                 |                |                   |                   |                   |                  |                  |                  |                   |
|-------------------------------------------------------|---------------|-----------------|----------------|-------------------|-------------------|-------------------|------------------|------------------|------------------|-------------------|
| Scrg1                                                 | FC > 5        | cluster_1       | cluster_4      | 14                | 0                 | 9                 | 35               | 39               | 37               | 5.011             |
| Smoc2                                                 | FC > 5        | cluster_1       | cluster_4      | 32                | 9                 | 11                | 125              | 103              | 150              | 7.395             |
| Tgm5                                                  | FC > 5        | cluster_1       | cluster_4      | 0                 | 0                 | 0                 | 9                | 19               | 1                | 53.429            |
| Trp53i11                                              | FC > 5        | cluster_1       | cluster_4      | 0                 | 1                 | 0                 | 17               | 32               | 17               | 63.045            |
| Zdhhc2                                                | FC > 5        | cluster_1       | cluster_4      | 0                 | 0                 | 0                 | 10               | 9                | 10               | 52.932            |
| <b>FC&gt;5, H3K27me3 cluster 2</b>                    |               |                 |                |                   |                   |                   |                  |                  |                  |                   |
| <b>FC&gt;5, H3K27me3 cluster 2, H3K4me3 cluster 2</b> |               |                 |                |                   |                   |                   |                  |                  |                  |                   |
| <b>Id</b>                                             | <b>RNAseq</b> | <b>H3K27me3</b> | <b>H3K4me3</b> | <b>norm.dms01</b> | <b>norm.dms02</b> | <b>norm.dms03</b> | <b>norm.epz1</b> | <b>norm.epz2</b> | <b>norm.epz3</b> | <b>FoldChange</b> |
| Wif1                                                  | FC > 5        | cluster_2       | cluster_2      | 215               | 218               | 227               | 1672             | 1499             | 1512             | 7.087             |
| <b>FC&gt;5, H3K27me3 cluster 2, H3K4me3 cluster 3</b> |               |                 |                |                   |                   |                   |                  |                  |                  |                   |
| <b>Id</b>                                             | <b>RNAseq</b> | <b>H3K27me3</b> | <b>H3K4me3</b> | <b>norm.dms01</b> | <b>norm.dms02</b> | <b>norm.dms03</b> | <b>norm.epz1</b> | <b>norm.epz2</b> | <b>norm.epz3</b> | <b>FoldChange</b> |
| Csrnp3                                                | FC > 5        | cluster_2       | cluster_3      | 0                 | 0                 | 1                 | 25               | 22               | 34               | 75.561            |
| Ptgdr2                                                | FC > 5        | cluster_2       | cluster_3      | 5                 | 1                 | 0                 | 7                | 34               | 11               | 9.963             |
| Ramp1                                                 | FC > 5        | cluster_2       | cluster_3      | 282               | 290               | 374               | 1673             | 1853             | 1717             | 5.536             |
| Slc9a2                                                | FC > 5        | cluster_2       | cluster_3      | 0                 | 0                 | 4                 | 38               | 45               | 25               | 28.189            |
| Vnn1                                                  | FC > 5        | cluster_2       | cluster_3      | 5                 | 6                 | 1                 | 16               | 40               | 33               | 8.063             |
| <b>FC&gt;5, H3K27me3 cluster 2, H3K4me3 cluster 4</b> |               |                 |                |                   |                   |                   |                  |                  |                  |                   |
| <b>Id</b>                                             | <b>RNAseq</b> | <b>H3K27me3</b> | <b>H3K4me3</b> | <b>norm.dms01</b> | <b>norm.dms02</b> | <b>norm.dms03</b> | <b>norm.epz1</b> | <b>norm.epz2</b> | <b>norm.epz3</b> | <b>FoldChange</b> |
| Acsm4                                                 | FC > 5        | cluster_2       | cluster_4      | 0                 | 0                 | 0                 | 7                | 21               | 15               | 78.656            |
| Adamts12                                              | FC > 5        | cluster_2       | cluster_4      | 2                 | 1                 | 7                 | 18               | 25               | 27               | 6.708             |
| Agtr1a                                                | FC > 5        | cluster_2       | cluster_4      | 2                 | 1                 | 1                 | 20               | 15               | 13               | 11.91             |
| Alpk3                                                 | FC > 5        | cluster_2       | cluster_4      | 0                 | 1                 | 0                 | 11               | 20               | 2                | 31.235            |
| B4galnt3                                              | FC > 5        | cluster_2       | cluster_4      | 0                 | 1                 | 1                 | 38               | 40               | 27               | 53.873            |
| Bcan                                                  | FC > 5        | cluster_2       | cluster_4      | 1                 | 12                | 8                 | 29               | 61               | 40               | 6.152             |
| Btla                                                  | FC > 5        | cluster_2       | cluster_4      | 0                 | 0                 | 1                 | 12               | 8                | 15               | 33.288            |
| Cabp1                                                 | FC > 5        | cluster_2       | cluster_4      | 1                 | 6                 | 4                 | 33               | 29               | 29               | 7.799             |
| Camk1g                                                | FC > 5        | cluster_2       | cluster_4      | 6                 | 0                 | 0                 | 24               | 29               | 13               | 12.324            |
| Ccdc88c                                               | FC > 5        | cluster_2       | cluster_4      | 1                 | 2                 | 11                | 53               | 44               | 61               | 10.465            |
| Col22a1                                               | FC > 5        | cluster_2       | cluster_4      | 1                 | 2                 | 1                 | 27               | 40               | 4                | 18.08             |
| Fam81a                                                | FC > 5        | cluster_2       | cluster_4      | 20                | 3                 | 1                 | 112              | 139              | 139              | 16.743            |
| Hhat1                                                 | FC > 5        | cluster_2       | cluster_4      | 0                 | 0                 | 0                 | 1                | 13               | 27               | 75.925            |
| Itga4                                                 | FC > 5        | cluster_2       | cluster_4      | 0                 | 0                 | 0                 | 7                | 9                | 5                | 39.459            |
| Klhl40                                                | FC > 5        | cluster_2       | cluster_4      | 0                 | 0                 | 0                 | 14               | 5                | 5                | 45.923            |
| Ldb2                                                  | FC > 5        | cluster_2       | cluster_4      | 0                 | 0                 | 1                 | 10               | 11               | 8                | 26.859            |
| Myt1                                                  | FC > 5        | cluster_2       | cluster_4      | 0                 | 0                 | 0                 | 2                | 13               | 7                | 40.331            |
| Oprl1                                                 | FC > 5        | cluster_2       | cluster_4      | 9                 | 0                 | 1                 | 38               | 29               | 46               | 11.853            |
| Rab15                                                 | FC > 5        | cluster_2       | cluster_4      | 0                 | 1                 | 1                 | 12               | 18               | 30               | 31.048            |
| <b>FC&gt;5, H3K27me3 cluster 3</b>                    |               |                 |                |                   |                   |                   |                  |                  |                  |                   |
| <b>FC&gt;5, H3K27me3 cluster 3, H3K4me3 cluster 1</b> |               |                 |                |                   |                   |                   |                  |                  |                  |                   |
| <b>Id</b>                                             | <b>RNAseq</b> | <b>H3K27me3</b> | <b>H3K4me3</b> | <b>norm.dms01</b> | <b>norm.dms02</b> | <b>norm.dms03</b> | <b>norm.epz1</b> | <b>norm.epz2</b> | <b>norm.epz3</b> | <b>FoldChange</b> |
| Phospho1                                              | FC > 5        | cluster_3       | cluster_1      | 368               | 353               | 459               | 2643             | 3045             | 3065             | 7.404             |
| <b>FC&gt;5, H3K27me3 cluster 3, H3K4me3 cluster 2</b> |               |                 |                |                   |                   |                   |                  |                  |                  |                   |
| <b>Id</b>                                             | <b>RNAseq</b> | <b>H3K27me3</b> | <b>H3K4me3</b> | <b>norm.dms01</b> | <b>norm.dms02</b> | <b>norm.dms03</b> | <b>norm.epz1</b> | <b>norm.epz2</b> | <b>norm.epz3</b> | <b>FoldChange</b> |
| Ostn                                                  | FC > 5        | cluster_3       | cluster_2      | 0                 | 0                 | 0                 | 32               | 46               | 23               | 183.567           |
| <b>FC&gt;5, H3K27me3 cluster 3, H3K4me3 cluster 3</b> |               |                 |                |                   |                   |                   |                  |                  |                  |                   |
| <b>Id</b>                                             | <b>RNAseq</b> | <b>H3K27me3</b> | <b>H3K4me3</b> | <b>norm.dms01</b> | <b>norm.dms02</b> | <b>norm.dms03</b> | <b>norm.epz1</b> | <b>norm.epz2</b> | <b>norm.epz3</b> | <b>FoldChange</b> |
| Abi3                                                  | FC > 5        | cluster_3       | cluster_3      | 49                | 80                | 74                | 386              | 406              | 403              | 5.852             |
| Mtus2                                                 | FC > 5        | cluster_3       | cluster_3      | 7                 | 16                | 17                | 90               | 47               | 91               | 5.741             |
| Prokr1                                                | FC > 5        | cluster_3       | cluster_3      | 0                 | 8                 | 4                 | 49               | 20               | 14               | 7.197             |
| Rxfp3                                                 | FC > 5        | cluster_3       | cluster_3      | 0                 | 2                 | 9                 | 43               | 53               | 41               | 12.159            |

## FC&gt;5, H3K27me3 cluster 3, H3K4me3 cluster 4

| Id          | RNAseq | H3K27me3  | H3K4me3   | norm.dmsol | norm.dmsol2 | norm.dmsol3 | norm.epz1 | norm.epz2 | norm.epz3 | FoldChange |
|-------------|--------|-----------|-----------|------------|-------------|-------------|-----------|-----------|-----------|------------|
| 4930594C11R | FC > 5 | cluster_3 | cluster_4 | 0          | 0           | 0           | 9         | 6         | 9         | 44.133     |
| Acox1       | FC > 5 | cluster_3 | cluster_4 | 5          | 4           | 4           | 18        | 32        | 28        | 6.157      |
| Adamts18    | FC > 5 | cluster_3 | cluster_4 | 0          | 0           | 1           | 35        | 31        | 41        | 99.868     |
| Adgrf4      | FC > 5 | cluster_3 | cluster_4 | 0          | 0           | 0           | 13        | 8         | 13        | 62.785     |
| Alx3        | FC > 5 | cluster_3 | cluster_4 | 2          | 1           | 1           | 39        | 56        | 49        | 36.06      |
| Aox3        | FC > 5 | cluster_3 | cluster_4 | 0          | 0           | 4           | 25        | 17        | 9         | 13.417     |
| Apcdd1      | FC > 5 | cluster_3 | cluster_4 | 167        | 130         | 136         | 868       | 809       | 691       | 5.489      |
| Atp1b2      | FC > 5 | cluster_3 | cluster_4 | 0          | 0           | 1           | 26        | 24        | 7         | 52.957     |
| Cbln1       | FC > 5 | cluster_3 | cluster_4 | 1          | 0           | 0           | 5         | 11        | 13        | 27.108     |
| Cd200       | FC > 5 | cluster_3 | cluster_4 | 15         | 28          | 19          | 312       | 275       | 337       | 14.9       |
| Cd300lb     | FC > 5 | cluster_3 | cluster_4 | 0          | 0           | 1           | 6         | 8         | 20        | 31.579     |
| Col2a1      | FC > 5 | cluster_3 | cluster_4 | 2479       | 3655        | 4548        | 18933     | 26948     | 21675     | 6.323      |
| Col9a1      | FC > 5 | cluster_3 | cluster_4 | 0          | 0           | 4           | 39        | 52        | 30        | 31.672     |
| Dio2        | FC > 5 | cluster_3 | cluster_4 | 0          | 0           | 2           | 16        | 13        | 20        | 25.682     |
| Fras1       | FC > 5 | cluster_3 | cluster_4 | 0          | 0           | 4           | 16        | 13        | 21        | 13.157     |
| Frem1       | FC > 5 | cluster_3 | cluster_4 | 28         | 7           | 26          | 275       | 241       | 259       | 12.805     |
| Frzb        | FC > 5 | cluster_3 | cluster_4 | 0          | 0           | 1           | 26        | 93        | 57        | 164.674    |
| Gap43       | FC > 5 | cluster_3 | cluster_4 | 5          | 2           | 1           | 22        | 7         | 33        | 8.537      |
| Gli2        | FC > 5 | cluster_3 | cluster_4 | 0          | 0           | 0           | 14        | 54        | 41        | 200.062    |
| Grhl3       | FC > 5 | cluster_3 | cluster_4 | 8          | 18          | 11          | 86        | 142       | 107       | 9.211      |
| Grrp1       | FC > 5 | cluster_3 | cluster_4 | 0          | 0           | 1           | 18        | 18        | 10        | 43.349     |
| H19         | FC > 5 | cluster_3 | cluster_4 | 15         | 6           | 2           | 146       | 109       | 118       | 17.386     |
| Hfe2        | FC > 5 | cluster_3 | cluster_4 | 0          | 6           | 0           | 23        | 19        | 17        | 9.95       |
| Klik14      | FC > 5 | cluster_3 | cluster_4 | 5          | 2           | 4           | 21        | 31        | 24        | 7.55       |
| Lama1       | FC > 5 | cluster_3 | cluster_4 | 0          | 3           | 1           | 27        | 17        | 9         | 13.443     |
| Lcp1        | FC > 5 | cluster_3 | cluster_4 | 2          | 8           | 0           | 41        | 58        | 52        | 15.17      |
| Lingo1      | FC > 5 | cluster_3 | cluster_4 | 6          | 0           | 4           | 9         | 42        | 27        | 8.685      |
| Lipg        | FC > 5 | cluster_3 | cluster_4 | 1          | 3           | 7           | 69        | 53        | 60        | 15.659     |
| Myzap       | FC > 5 | cluster_3 | cluster_4 | 40         | 42          | 30          | 230       | 240       | 232       | 6.299      |
| Penk        | FC > 5 | cluster_3 | cluster_4 | 0          | 10          | 6           | 41        | 54        | 51        | 8.934      |
| Prss16      | FC > 5 | cluster_3 | cluster_4 | 6          | 1           | 5           | 47        | 13        | 24        | 7.098      |
| Ptpr        | FC > 5 | cluster_3 | cluster_4 | 0          | 0           | 0           | 5         | 16        | 7         | 50.905     |
| Ptpru       | FC > 5 | cluster_3 | cluster_4 | 1          | 5           | 2           | 26        | 22        | 23        | 9.018      |
| Rab11fip4   | FC > 5 | cluster_3 | cluster_4 | 5          | 5           | 5           | 32        | 58        | 50        | 9.494      |
| Rapgef4     | FC > 5 | cluster_3 | cluster_4 | 1          | 0           | 1           | 26        | 50        | 26        | 51.615     |
| Slc8a3      | FC > 5 | cluster_3 | cluster_4 | 182        | 174         | 158         | 1918      | 2108      | 1917      | 11.596     |
| Srgap1      | FC > 5 | cluster_3 | cluster_4 | 12         | 1           | 1           | 35        | 55        | 23        | 8.145      |
| Stox2       | FC > 5 | cluster_3 | cluster_4 | 0          | 2           | 0           | 23        | 16        | 5         | 22.404     |
| Tppp        | FC > 5 | cluster_3 | cluster_4 | 5          | 4           | 7           | 17        | 31        | 39        | 5.625      |
| Tspan12     | FC > 5 | cluster_3 | cluster_4 | 3          | 3           | 2           | 29        | 29        | 40        | 12.229     |
| Wdr72       | FC > 5 | cluster_3 | cluster_4 | 0          | 1           | 1           | 30        | 39        | 12        | 41.669     |

## FC&gt;5, H3K27me3 cluster 4

## FC&gt;5, H3K27me3 cluster 4, H3K4me3 cluster 3

| Id      | RNAseq | H3K27me3  | H3K4me3   | norm.dmsol | norm.dmsol2 | norm.dmsol3 | norm.epz1 | norm.epz2 | norm.epz3 | FoldChange |
|---------|--------|-----------|-----------|------------|-------------|-------------|-----------|-----------|-----------|------------|
| Col11a2 | FC > 5 | cluster_4 | cluster_3 | 101        | 212         | 296         | 1232      | 2555      | 1634      | 8.882      |
| Rcsd1   | FC > 5 | cluster_4 | cluster_3 | 7          | 6           | 0           | 18        | 41        | 28        | 7.125      |

| FC>5, H3K27me3 cluster 4, H3K4me3 cluster 4 |        |           |           |            |            |            |           |           |           |            |
|---------------------------------------------|--------|-----------|-----------|------------|------------|------------|-----------|-----------|-----------|------------|
| Id                                          | RNAseq | H3K27me3  | H3K4me3   | norm.dms01 | norm.dms02 | norm.dms03 | norm.epz1 | norm.epz2 | norm.epz3 | FoldChange |
| 1700017G19R                                 | FC > 5 | cluster_4 | cluster_4 | 1          | 0          | 0          | 8         | 8         | 13        | 27.432     |
| 2610027K06R                                 | FC > 5 | cluster_4 | cluster_4 | 1          | 4          | 3          | 12        | 26        | 32        | 8.942      |
| C1qtnf3                                     | FC > 5 | cluster_4 | cluster_4 | 316        | 195        | 220        | 1682      | 1548      | 1480      | 6.471      |
| Car3                                        | FC > 5 | cluster_4 | cluster_4 | 225        | 265        | 264        | 1698      | 1634      | 1747      | 6.725      |
| Crybb1                                      | FC > 5 | cluster_4 | cluster_4 | 0          | 0          | 1          | 6         | 26        | 11        | 40.471     |
| D030025E07R                                 | FC > 5 | cluster_4 | cluster_4 | 0          | 0          | 0          | 22        | 30        | 26        | 141.044    |
| Fibin                                       | FC > 5 | cluster_4 | cluster_4 | 0          | 0          | 0          | 5         | 9         | 7         | 37.689     |
| Galnt3                                      | FC > 5 | cluster_4 | cluster_4 | 24         | 11         | 52         | 183       | 201       | 179       | 6.447      |
| Galnt5                                      | FC > 5 | cluster_4 | cluster_4 | 0          | 0          | 1          | 12        | 9         | 10        | 29.093     |
| Hdac9                                       | FC > 5 | cluster_4 | cluster_4 | 14         | 3          | 8          | 40        | 48        | 63        | 6.231      |
| Hecw2                                       | FC > 5 | cluster_4 | cluster_4 | 47         | 17         | 43         | 202       | 229       | 149       | 5.467      |
| Ifitm5                                      | FC > 5 | cluster_4 | cluster_4 | 166        | 182        | 236        | 1595      | 2158      | 1914      | 9.677      |
| Klhl30                                      | FC > 5 | cluster_4 | cluster_4 | 51         | 84         | 89         | 404       | 449       | 415       | 5.618      |
| Krt33b                                      | FC > 5 | cluster_4 | cluster_4 | 1          | 12         | 8          | 45        | 36        | 29        | 5.219      |
| Lhx4                                        | FC > 5 | cluster_4 | cluster_4 | 0          | 0          | 1          | 18        | 10        | 7         | 32.671     |
| Lhx9                                        | FC > 5 | cluster_4 | cluster_4 | 7          | 4          | 8          | 13        | 38        | 46        | 5.171      |
| Ncf1                                        | FC > 5 | cluster_4 | cluster_4 | 56         | 55         | 56         | 311       | 349       | 287       | 5.71       |
| Nrgn                                        | FC > 5 | cluster_4 | cluster_4 | 1          | 0          | 1          | 15        | 17        | 14        | 23.498     |
| Pdzd2                                       | FC > 5 | cluster_4 | cluster_4 | 117        | 141        | 183        | 1045      | 1069      | 1027      | 7.086      |
| Prex1                                       | FC > 5 | cluster_4 | cluster_4 | 3          | 1          | 4          | 128       | 231       | 170       | 59.75      |
| Prss35                                      | FC > 5 | cluster_4 | cluster_4 | 67         | 104        | 102        | 476       | 497       | 535       | 5.495      |
| Rorc                                        | FC > 5 | cluster_4 | cluster_4 | 0          | 1          | 2          | 15        | 9         | 29        | 18.514     |
| Shroom2                                     | FC > 5 | cluster_4 | cluster_4 | 0          | 0          | 0          | 9         | 4         | 9         | 39.174     |
| Slc6a15                                     | FC > 5 | cluster_4 | cluster_4 | 1          | 0          | 4          | 20        | 32        | 23        | 12.976     |
| Smpd3                                       | FC > 5 | cluster_4 | cluster_4 | 1897       | 2561       | 3045       | 15884     | 19095     | 17678     | 7.015      |
| Syt8                                        | FC > 5 | cluster_4 | cluster_4 | 3          | 4          | 1          | 14        | 28        | 26        | 8.49       |
| Tmem74                                      | FC > 5 | cluster_4 | cluster_4 | 1          | 4          | 5          | 30        | 17        | 35        | 7.677      |
| Tpd52                                       | FC > 5 | cluster_4 | cluster_4 | 19         | 23         | 46         | 212       | 214       | 197       | 7.026      |
| Trpm1                                       | FC > 5 | cluster_4 | cluster_4 | 1          | 0          | 2          | 14        | 19        | 7         | 13.575     |
| Trpm5                                       | FC > 5 | cluster_4 | cluster_4 | 0          | 7          | 7          | 30        | 32        | 33        | 6.624      |



**Table S2:** EPZ6438-induced genes listed in figure 3E that exhibited change in gene expression ( $5 < FC > 2$ ) by RNA-seq that correlated with a reduction in H3K27me3 and presence or increase in H3K4me3 by K-means clustering.

| 5<FC>2                                        |            |           |           |            |            |            |           |           |           |            |
|-----------------------------------------------|------------|-----------|-----------|------------|------------|------------|-----------|-----------|-----------|------------|
| 5<FC>2, H3K27me3 cluster 1                    |            |           |           |            |            |            |           |           |           |            |
| 5<FC>2, H3K27me3 cluster 1, H3K4me3 cluster 2 |            |           |           |            |            |            |           |           |           |            |
| Id                                            | RNAseq     | H3K27me3  | H3K4me3   | norm.dms01 | norm.dms02 | norm.dms03 | norm.epz1 | norm.epz2 | norm.epz3 | FoldChange |
| Dlk2                                          | 5 < FC > 2 | cluster_1 | cluster_2 | 64         | 109        | 133        | 176       | 291       | 232       | 2.278      |
| Neur1a                                        | 5 < FC > 2 | cluster_1 | cluster_2 | 191        | 236        | 292        | 546       | 779       | 656       | 2.751      |
| Scube3                                        | 5 < FC > 2 | cluster_1 | cluster_2 | 114        | 147        | 177        | 316       | 451       | 340       | 2.526      |
| 5<FC>2, H3K27me3 cluster 1, H3K4me3 cluster 3 |            |           |           |            |            |            |           |           |           |            |
| Id                                            | RNAseq     | H3K27me3  | H3K4me3   | norm.dms01 | norm.dms02 | norm.dms03 | norm.epz1 | norm.epz2 | norm.epz3 | FoldChange |
| Aldh111                                       | 5 < FC > 2 | cluster_1 | cluster_3 | 26         | 26         | 32         | 108       | 90        | 80        | 3.289      |
| Cracr2a                                       | 5 < FC > 2 | cluster_1 | cluster_3 | 86         | 63         | 108        | 170       | 172       | 271       | 2.377      |
| Dync1i1                                       | 5 < FC > 2 | cluster_1 | cluster_3 | 22         | 13         | 15         | 64        | 54        | 40        | 3.222      |
| Gata2                                         | 5 < FC > 2 | cluster_1 | cluster_3 | 36         | 49         | 106        | 135       | 159       | 146       | 2.289      |
| Ggt7                                          | 5 < FC > 2 | cluster_1 | cluster_3 | 70         | 133        | 178        | 255       | 276       | 289       | 2.14       |
| Notum                                         | 5 < FC > 2 | cluster_1 | cluster_3 | 72         | 104        | 135        | 250       | 311       | 262       | 2.645      |
| Pacsin1                                       | 5 < FC > 2 | cluster_1 | cluster_3 | 18         | 9          | 17         | 53        | 37        | 61        | 3.456      |
| Pcp4l1                                        | 5 < FC > 2 | cluster_1 | cluster_3 | 3          | 18         | 10         | 50        | 34        | 67        | 4.883      |
| Plcg2                                         | 5 < FC > 2 | cluster_1 | cluster_3 | 72         | 92         | 111        | 190       | 255       | 234       | 2.462      |
| Ppfi4                                         | 5 < FC > 2 | cluster_1 | cluster_3 | 1          | 9          | 16         | 38        | 35        | 30        | 3.927      |
| Ptprv                                         | 5 < FC > 2 | cluster_1 | cluster_3 | 1544       | 2026       | 2429       | 4139      | 5311      | 4310      | 2.293      |
| Scn4a                                         | 5 < FC > 2 | cluster_1 | cluster_3 | 43         | 54         | 56         | 176       | 70        | 103       | 2.28       |
| Slc25a23                                      | 5 < FC > 2 | cluster_1 | cluster_3 | 82         | 76         | 88         | 192       | 174       | 214       | 2.352      |
| Slc35g1                                       | 5 < FC > 2 | cluster_1 | cluster_3 | 45         | 51         | 62         | 155       | 138       | 159       | 2.846      |
| Sstr2                                         | 5 < FC > 2 | cluster_1 | cluster_3 | 8          | 13         | 5          | 34        | 34        | 47        | 4.43       |
| Tnfrsf21                                      | 5 < FC > 2 | cluster_1 | cluster_3 | 100        | 93         | 115        | 170       | 232       | 227       | 2.047      |
| 5<FC>2, H3K27me3 cluster 1, H3K4me3 cluster 4 |            |           |           |            |            |            |           |           |           |            |
| Id                                            | RNAseq     | H3K27me3  | H3K4me3   | norm.dms01 | norm.dms02 | norm.dms03 | norm.epz1 | norm.epz2 | norm.epz3 | FoldChange |
| Atp2a3                                        | 5 < FC > 2 | cluster_1 | cluster_4 | 28         | 22         | 44         | 111       | 146       | 93        | 3.716      |
| Cdh22                                         | 5 < FC > 2 | cluster_1 | cluster_4 | 3          | 13         | 20         | 30        | 97        | 33        | 4.33       |
| Myl10                                         | 5 < FC > 2 | cluster_1 | cluster_4 | 84         | 87         | 55         | 174       | 170       | 228       | 2.541      |
| Rhbd2                                         | 5 < FC > 2 | cluster_1 | cluster_4 | 41         | 45         | 69         | 107       | 126       | 134       | 2.36       |
| Tspan18                                       | 5 < FC > 2 | cluster_1 | cluster_4 | 241        | 314        | 312        | 771       | 937       | 846       | 2.942      |
| 5<FC>2, H3K27me3 cluster 2                    |            |           |           |            |            |            |           |           |           |            |
| 5<FC>2, H3K27me3 cluster 2, H3K4me3 cluster 1 |            |           |           |            |            |            |           |           |           |            |
| Id                                            | RNAseq     | H3K27me3  | H3K4me3   | norm.dms01 | norm.dms02 | norm.dms03 | norm.epz1 | norm.epz2 | norm.epz3 | FoldChange |
| Chd7                                          | 5 < FC > 2 | cluster_2 | cluster_1 | 435        | 506        | 541        | 1024      | 1019      | 1090      | 2.111      |
| 5<FC>2, H3K27me3 cluster 2, H3K4me3 cluster 2 |            |           |           |            |            |            |           |           |           |            |
| Id                                            | RNAseq     | H3K27me3  | H3K4me3   | norm.dms01 | norm.dms02 | norm.dms03 | norm.epz1 | norm.epz2 | norm.epz3 | FoldChange |
| Ak4                                           | 5 < FC > 2 | cluster_2 | cluster_2 | 203        | 132        | 177        | 435       | 317       | 339       | 2.131      |
| Chst11                                        | 5 < FC > 2 | cluster_2 | cluster_2 | 984        | 845        | 687        | 2489      | 2212      | 2317      | 2.791      |
| Cxcl12                                        | 5 < FC > 2 | cluster_2 | cluster_2 | 1502       | 1270       | 1388       | 2847      | 2931      | 2946      | 2.098      |
| Lims2                                         | 5 < FC > 2 | cluster_2 | cluster_2 | 7          | 21         | 21         | 38        | 52        | 58        | 3.009      |
| Rhou                                          | 5 < FC > 2 | cluster_2 | cluster_2 | 647        | 536        | 565        | 1333      | 1124      | 1150      | 2.064      |
| Rhpn2                                         | 5 < FC > 2 | cluster_2 | cluster_2 | 127        | 95         | 89         | 366       | 332       | 360       | 3.415      |
| Sgk3                                          | 5 < FC > 2 | cluster_2 | cluster_2 | 143        | 114        | 92         | 268       | 273       | 271       | 2.333      |

|                                               |               |                 |                |                   |                   |                   |                  |                  |                  |                   |
|-----------------------------------------------|---------------|-----------------|----------------|-------------------|-------------------|-------------------|------------------|------------------|------------------|-------------------|
| Tbx2                                          | 5 <FC> 2      | cluster_2       | cluster_2      | 127               | 91                | 161               | 462              | 657              | 617              | 4.568             |
| Wnt6                                          | 5 <FC> 2      | cluster_2       | cluster_2      | 352               | 375               | 438               | 779              | 1002             | 857              | 2.263             |
| 5<FC>2, H3K27me3 cluster 2, H3K4me3 cluster 3 |               |                 |                |                   |                   |                   |                  |                  |                  |                   |
| <b>Id</b>                                     | <b>RNAseq</b> | <b>H3K27me3</b> | <b>H3K4me3</b> | <b>norm.dms01</b> | <b>norm.dms02</b> | <b>norm.dms03</b> | <b>norm.epz1</b> | <b>norm.epz2</b> | <b>norm.epz3</b> | <b>FoldChange</b> |
| 1110017D15R                                   | 5 <FC> 2      | cluster_2       | cluster_3      | 15                | 11                | 25                | 41               | 42               | 53               | 2.698             |
| 4833417C18R                                   | 5 <FC> 2      | cluster_2       | cluster_3      | 41                | 28                | 16                | 82               | 57               | 64               | 2.401             |
| Aif1l                                         | 5 <FC> 2      | cluster_2       | cluster_3      | 188               | 175               | 144               | 342              | 310              | 367              | 2.013             |
| Dlx3                                          | 5 <FC> 2      | cluster_2       | cluster_3      | 87                | 74                | 95                | 337              | 327              | 328              | 3.858             |
| Itga9                                         | 5 <FC> 2      | cluster_2       | cluster_3      | 559               | 667               | 653               | 1333             | 1300             | 1324             | 2.104             |
| Mfap4                                         | 5 <FC> 2      | cluster_2       | cluster_3      | 91                | 52                | 97                | 270              | 312              | 311              | 3.726             |
| Myom1                                         | 5 <FC> 2      | cluster_2       | cluster_3      | 563               | 568               | 571               | 1781             | 1634             | 1662             | 2.98              |
| Nlrc5                                         | 5 <FC> 2      | cluster_2       | cluster_3      | 92                | 107               | 98                | 199              | 309              | 208              | 2.415             |
| Osr2                                          | 5 <FC> 2      | cluster_2       | cluster_3      | 33                | 50                | 56                | 66               | 120              | 103              | 2.069             |
| Pde5a                                         | 5 <FC> 2      | cluster_2       | cluster_3      | 16                | 30                | 15                | 39               | 57               | 70               | 2.709             |
| Pgm2l1                                        | 5 <FC> 2      | cluster_2       | cluster_3      | 207               | 256               | 168               | 454              | 397              | 509              | 2.154             |
| Plagl1                                        | 5 <FC> 2      | cluster_2       | cluster_3      | 5823              | 6564              | 6223              | 13321            | 13501            | 13104            | 2.145             |
| Wnt4                                          | 5 <FC> 2      | cluster_2       | cluster_3      | 136               | 161               | 240               | 335              | 530              | 395              | 2.338             |
| 5<FC>2, H3K27me3 cluster 2, H3K4me3 cluster 4 |               |                 |                |                   |                   |                   |                  |                  |                  |                   |
| <b>Id</b>                                     | <b>RNAseq</b> | <b>H3K27me3</b> | <b>H3K4me3</b> | <b>norm.dms01</b> | <b>norm.dms02</b> | <b>norm.dms03</b> | <b>norm.epz1</b> | <b>norm.epz2</b> | <b>norm.epz3</b> | <b>FoldChange</b> |
| C4b                                           | 5 <FC> 2      | cluster_2       | cluster_4      | 9                 | 13                | 13                | 44               | 31               | 28               | 2.921             |
| Camk4                                         | 5 <FC> 2      | cluster_2       | cluster_4      | 106               | 80                | 107               | 346              | 276              | 325              | 3.237             |
| Extl1                                         | 5 <FC> 2      | cluster_2       | cluster_4      | 6                 | 13                | 21                | 48               | 59               | 77               | 4.591             |
| Greb1                                         | 5 <FC> 2      | cluster_2       | cluster_4      | 9                 | 6                 | 7                 | 44               | 19               | 33               | 4.356             |
| Igf2                                          | 5 <FC> 2      | cluster_2       | cluster_4      | 212               | 200               | 217               | 407              | 396              | 522              | 2.105             |
| Inhbb                                         | 5 <FC> 2      | cluster_2       | cluster_4      | 76                | 53                | 101               | 121              | 187              | 163              | 2.046             |
| Lif                                           | 5 <FC> 2      | cluster_2       | cluster_4      | 186               | 113               | 145               | 284              | 321              | 286              | 2.016             |
| Mab2l1l3                                      | 5 <FC> 2      | cluster_2       | cluster_4      | 61                | 69                | 69                | 165              | 181              | 164              | 2.556             |
| Map3k13                                       | 5 <FC> 2      | cluster_2       | cluster_4      | 26                | 24                | 22                | 109              | 69               | 91               | 3.711             |
| Nhsl1                                         | 5 <FC> 2      | cluster_2       | cluster_4      | 1627              | 1674              | 1727              | 4489             | 4760             | 4896             | 2.812             |
| Pcsk6                                         | 5 <FC> 2      | cluster_2       | cluster_4      | 694               | 624               | 786               | 2008             | 2375             | 2155             | 3.106             |
| Twist2                                        | 5 <FC> 2      | cluster_2       | cluster_4      | 18                | 23                | 25                | 61               | 61               | 40               | 2.47              |
| Vipr2                                         | 5 <FC> 2      | cluster_2       | cluster_4      | 22                | 13                | 4                 | 41               | 48               | 43               | 3.552             |
| Wnt7b                                         | 5 <FC> 2      | cluster_2       | cluster_4      | 41                | 24                | 30                | 87               | 92               | 117              | 3.13              |
| 5<FC>2, H3K27me3 cluster 3                    |               |                 |                |                   |                   |                   |                  |                  |                  |                   |
| 5<FC>2, H3K27me3 cluster 3, H3K4me3 cluster 1 |               |                 |                |                   |                   |                   |                  |                  |                  |                   |
| <b>Id</b>                                     | <b>RNAseq</b> | <b>H3K27me3</b> | <b>H3K4me3</b> | <b>norm.dms01</b> | <b>norm.dms02</b> | <b>norm.dms03</b> | <b>norm.epz1</b> | <b>norm.epz2</b> | <b>norm.epz3</b> | <b>FoldChange</b> |
| Nr4a3                                         | 5 <FC> 2      | cluster_3       | cluster_1      | 121               | 92                | 77                | 305              | 336              | 330              | 3.363             |
| Zfp618                                        | 5 <FC> 2      | cluster_3       | cluster_1      | 41                | 71                | 74                | 117              | 219              | 207              | 2.9               |
| 5<FC>2, H3K27me3 cluster 3, H3K4me3 cluster 2 |               |                 |                |                   |                   |                   |                  |                  |                  |                   |
| <b>Id</b>                                     | <b>RNAseq</b> | <b>H3K27me3</b> | <b>H3K4me3</b> | <b>norm.dms01</b> | <b>norm.dms02</b> | <b>norm.dms03</b> | <b>norm.epz1</b> | <b>norm.epz2</b> | <b>norm.epz3</b> | <b>FoldChange</b> |
| Hectd2                                        | 5 <FC> 2      | cluster_3       | cluster_2      | 271               | 238               | 189               | 544              | 519              | 562              | 2.333             |
| Itga6                                         | 5 <FC> 2      | cluster_3       | cluster_2      | 10                | 34                | 11                | 74               | 42               | 76               | 3.479             |
| Pde1b                                         | 5 <FC> 2      | cluster_3       | cluster_2      | 174               | 176               | 158               | 382              | 362              | 427              | 2.308             |
| Tmod1                                         | 5 <FC> 2      | cluster_3       | cluster_2      | 192               | 160               | 232               | 526              | 566              | 546              | 2.799             |
| 5<FC>2, H3K27me3 cluster 3, H3K4me3 cluster 3 |               |                 |                |                   |                   |                   |                  |                  |                  |                   |
| <b>Id</b>                                     | <b>RNAseq</b> | <b>H3K27me3</b> | <b>H3K4me3</b> | <b>norm.dms01</b> | <b>norm.dms02</b> | <b>norm.dms03</b> | <b>norm.epz1</b> | <b>norm.epz2</b> | <b>norm.epz3</b> | <b>FoldChange</b> |
| Cd244                                         | 5 <FC> 2      | cluster_3       | cluster_3      | 25                | 18                | 27                | 60               | 64               | 60               | 2.616             |
| Ckmt1                                         | 5 <FC> 2      | cluster_3       | cluster_3      | 81                | 41                | 67                | 132              | 120              | 148              | 2.126             |
| Creb3l1                                       | 5 <FC> 2      | cluster_3       | cluster_3      | 4352              | 5987              | 7196              | 11504            | 13788            | 12683            | 2.165             |
| Dock8                                         | 5 <FC> 2      | cluster_3       | cluster_3      | 137               | 80                | 180               | 344              | 351              | 369              | 2.671             |

|         |          |           |           |     |     |     |     |     |     |       |
|---------|----------|-----------|-----------|-----|-----|-----|-----|-----|-----|-------|
| Efna3   | 5 <FC> 2 | cluster_3 | cluster_3 | 61  | 75  | 81  | 154 | 206 | 259 | 2.834 |
| Mob3b   | 5 <FC> 2 | cluster_3 | cluster_3 | 377 | 386 | 333 | 825 | 745 | 840 | 2.198 |
| Osbpl10 | 5 <FC> 2 | cluster_3 | cluster_3 | 20  | 42  | 38  | 82  | 83  | 111 | 2.724 |
| Plekhh1 | 5 <FC> 2 | cluster_3 | cluster_3 | 14  | 42  | 35  | 165 | 149 | 141 | 4.96  |
| Rasgrp2 | 5 <FC> 2 | cluster_3 | cluster_3 | 11  | 24  | 20  | 57  | 77  | 33  | 2.972 |
| Sema4a  | 5 <FC> 2 | cluster_3 | cluster_3 | 11  | 3   | 4   | 17  | 33  | 30  | 4.656 |

5<FC>2, H3K27me3 cluster 3, H3K4me3 cluster 4

| Id          | RNAseq   | H3K27me3  | H3K4me3   | norm.dms01 | norm.dms02 | norm.dms03 | norm.epz1 | norm.epz2 | norm.epz3 | FoldChange |
|-------------|----------|-----------|-----------|------------|------------|------------|-----------|-----------|-----------|------------|
| 3425401B19R | 5 <FC> 2 | cluster_3 | cluster_4 | 284        | 377        | 347        | 1139      | 1112      | 947       | 3.172      |
| Acot1       | 5 <FC> 2 | cluster_3 | cluster_4 | 17         | 20         | 22         | 84        | 49        | 65        | 3.372      |
| Adamts17    | 5 <FC> 2 | cluster_3 | cluster_4 | 2          | 15         | 10         | 25        | 36        | 55        | 4.295      |
| Arl4c       | 5 <FC> 2 | cluster_3 | cluster_4 | 450        | 360        | 265        | 1603      | 1471      | 1402      | 4.174      |
| Chst3       | 5 <FC> 2 | cluster_3 | cluster_4 | 175        | 197        | 197        | 451       | 362       | 399       | 2.128      |
| Cited1      | 5 <FC> 2 | cluster_3 | cluster_4 | 47         | 67         | 48         | 88        | 165       | 91        | 2.136      |
| Clstn3      | 5 <FC> 2 | cluster_3 | cluster_4 | 19         | 12         | 22         | 47        | 29        | 76        | 2.852      |
| Cmya5       | 5 <FC> 2 | cluster_3 | cluster_4 | 93         | 84         | 93         | 257       | 226       | 240       | 2.67       |
| Col23a1     | 5 <FC> 2 | cluster_3 | cluster_4 | 6          | 37         | 50         | 100       | 161       | 165       | 4.526      |
| Coro2b      | 5 <FC> 2 | cluster_3 | cluster_4 | 59         | 84         | 67         | 203       | 196       | 216       | 2.924      |
| Cpxm1       | 5 <FC> 2 | cluster_3 | cluster_4 | 30         | 39         | 20         | 66        | 98        | 60        | 2.522      |
| Cyp26b1     | 5 <FC> 2 | cluster_3 | cluster_4 | 1567       | 1930       | 1935       | 5522      | 5861      | 5823      | 3.166      |
| Dlg2        | 5 <FC> 2 | cluster_3 | cluster_4 | 26         | 23         | 27         | 78        | 74        | 76        | 2.957      |
| Dusp27      | 5 <FC> 2 | cluster_3 | cluster_4 | 508        | 497        | 579        | 1038      | 1194      | 1045      | 2.068      |
| Efr3b       | 5 <FC> 2 | cluster_3 | cluster_4 | 17         | 34         | 18         | 77        | 94        | 58        | 3.32       |
| Fgd3        | 5 <FC> 2 | cluster_3 | cluster_4 | 357        | 430        | 436        | 1120      | 1299      | 1222      | 2.974      |
| Gbgt1       | 5 <FC> 2 | cluster_3 | cluster_4 | 16         | 18         | 24         | 60        | 46        | 39        | 2.507      |
| Gimap6      | 5 <FC> 2 | cluster_3 | cluster_4 | 26         | 10         | 18         | 48        | 53        | 50        | 2.845      |
| Itpk1       | 5 <FC> 2 | cluster_3 | cluster_4 | 72         | 77         | 117        | 160       | 212       | 185       | 2.085      |
| Khdrbs3     | 5 <FC> 2 | cluster_3 | cluster_4 | 56         | 22         | 57         | 99        | 94        | 102       | 2.194      |
| Lax1        | 5 <FC> 2 | cluster_3 | cluster_4 | 18         | 26         | 9          | 45        | 39        | 67        | 2.838      |
| Mdga1       | 5 <FC> 2 | cluster_3 | cluster_4 | 647        | 723        | 901        | 1459      | 1574      | 1587      | 2.031      |
| Mme11       | 5 <FC> 2 | cluster_3 | cluster_4 | 12         | 29         | 16         | 76        | 84        | 64        | 3.877      |
| Mmp15       | 5 <FC> 2 | cluster_3 | cluster_4 | 18         | 33         | 50         | 69        | 107       | 85        | 2.541      |
| Ncald       | 5 <FC> 2 | cluster_3 | cluster_4 | 70         | 31         | 73         | 139       | 178       | 150       | 2.668      |
| Padi2       | 5 <FC> 2 | cluster_3 | cluster_4 | 198        | 155        | 242        | 952       | 815       | 966       | 4.596      |
| Pde1a       | 5 <FC> 2 | cluster_3 | cluster_4 | 42         | 84         | 45         | 145       | 141       | 132       | 2.435      |
| Phf19       | 5 <FC> 2 | cluster_3 | cluster_4 | 45         | 72         | 70         | 146       | 163       | 154       | 2.461      |
| Rap1gap2    | 5 <FC> 2 | cluster_3 | cluster_4 | 18         | 10         | 10         | 37        | 29        | 53        | 3.182      |
| Sox13       | 5 <FC> 2 | cluster_3 | cluster_4 | 30         | 30         | 48         | 114       | 166       | 118       | 3.66       |
| Tec         | 5 <FC> 2 | cluster_3 | cluster_4 | 3          | 7          | 18         | 41        | 28        | 42        | 3.911      |
| Tmem229b    | 5 <FC> 2 | cluster_3 | cluster_4 | 261        | 337        | 329        | 1061      | 943       | 1135      | 3.381      |
| Tmem56      | 5 <FC> 2 | cluster_3 | cluster_4 | 250        | 260        | 182        | 865       | 672       | 684       | 3.216      |
| Tns1        | 5 <FC> 2 | cluster_3 | cluster_4 | 2320       | 2879       | 3103       | 5645      | 6502      | 5752      | 2.155      |
| Zfp467      | 5 <FC> 2 | cluster_3 | cluster_4 | 12         | 15         | 34         | 101       | 70        | 87        | 4.131      |

5<FC>2, H3K27me3 cluster 4

5<FC>2, H3K27me3 cluster 4, H3K4me3 cluster 1

| Id    | RNAseq   | H3K27me3  | H3K4me3   | norm.dms01 | norm.dms02 | norm.dms03 | norm.epz1 | norm.epz2 | norm.epz3 | FoldChange |
|-------|----------|-----------|-----------|------------|------------|------------|-----------|-----------|-----------|------------|
| Rcor2 | 5 <FC> 2 | cluster_4 | cluster_1 | 1164       | 1427       | 1650       | 3908      | 4957      | 4320      | 3.108      |

5<FC>2, H3K27me3 cluster 4, H3K4me3 cluster 2

| Id    | RNAseq   | H3K27me3  | H3K4me3   | norm.dms01 | norm.dms02 | norm.dms03 | norm.epz1 | norm.epz2 | norm.epz3 | FoldChange |
|-------|----------|-----------|-----------|------------|------------|------------|-----------|-----------|-----------|------------|
| Asx13 | 5 <FC> 2 | cluster_4 | cluster_2 | 141        | 177        | 116        | 466       | 459       | 403       | 3.063      |

|                                               |               |                 |                |                   |                   |                   |                  |                  |                  |                   |
|-----------------------------------------------|---------------|-----------------|----------------|-------------------|-------------------|-------------------|------------------|------------------|------------------|-------------------|
| Bmper                                         | 5<FC>2        | cluster_4       | cluster_2      | 191               | 273               | 166               | 677              | 683              | 719              | 3.303             |
| Cdk5r1                                        | 5<FC>2        | cluster_4       | cluster_2      | 517               | 505               | 567               | 1102             | 1168             | 1064             | 2.099             |
| Ctgf                                          | 5<FC>2        | cluster_4       | cluster_2      | 643               | 689               | 623               | 1493             | 1286             | 1365             | 2.121             |
| Eil2                                          | 5<FC>2        | cluster_4       | cluster_2      | 285               | 315               | 226               | 542              | 536              | 581              | 2.01              |
| Fam102a                                       | 5<FC>2        | cluster_4       | cluster_2      | 1515              | 1937              | 2251              | 5424             | 5984             | 5855             | 3.025             |
| Fhod3                                         | 5<FC>2        | cluster_4       | cluster_2      | 941               | 847               | 877               | 2053             | 2122             | 2048             | 2.335             |
| Gpc1                                          | 5<FC>2        | cluster_4       | cluster_2      | 15633             | 21696             | 26841             | 37655            | 49599            | 43126            | 2.032             |
| Plxnb1                                        | 5<FC>2        | cluster_4       | cluster_2      | 811               | 961               | 1071              | 1783             | 2577             | 2248             | 2.324             |
| Rnd1                                          | 5<FC>2        | cluster_4       | cluster_2      | 40                | 56                | 54                | 84               | 114              | 104              | 2.021             |
| Sema5a                                        | 5<FC>2        | cluster_4       | cluster_2      | 68                | 57                | 40                | 271              | 239              | 276              | 4.806             |
| Sh3bp4                                        | 5<FC>2        | cluster_4       | cluster_2      | 865               | 1090              | 1228              | 2292             | 2619             | 2406             | 2.297             |
| 5<FC>2, H3K27me3 cluster 4, H3K4me3 cluster 3 |               |                 |                |                   |                   |                   |                  |                  |                  |                   |
| <b>Id</b>                                     | <b>RNAseq</b> | <b>H3K27me3</b> | <b>H3K4me3</b> | <b>norm.dms01</b> | <b>norm.dms02</b> | <b>norm.dms03</b> | <b>norm.epz1</b> | <b>norm.epz2</b> | <b>norm.epz3</b> | <b>FoldChange</b> |
| Bambi                                         | 5<FC>2        | cluster_4       | cluster_3      | 335               | 227               | 265               | 831              | 902              | 798              | 3.066             |
| Cspg4                                         | 5<FC>2        | cluster_4       | cluster_3      | 1962              | 3095              | 3862              | 8338             | 11229            | 9887             | 3.302             |
| Eepd1                                         | 5<FC>2        | cluster_4       | cluster_3      | 571               | 590               | 675               | 1434             | 1590             | 1497             | 2.461             |
| Hrc                                           | 5<FC>2        | cluster_4       | cluster_3      | 104               | 69                | 102               | 451              | 486              | 313              | 4.532             |
| Hspb7                                         | 5<FC>2        | cluster_4       | cluster_3      | 20                | 37                | 84                | 141              | 190              | 164              | 3.473             |
| Ibsp                                          | 5<FC>2        | cluster_4       | cluster_3      | 17867             | 15599             | 15329             | 50914            | 50066            | 49261            | 3.079             |
| Insc                                          | 5<FC>2        | cluster_4       | cluster_3      | 521               | 825               | 809               | 2236             | 2589             | 2573             | 3.43              |
| Jam2                                          | 5<FC>2        | cluster_4       | cluster_3      | 67                | 41                | 32                | 94               | 107              | 132              | 2.395             |
| Myo1d                                         | 5<FC>2        | cluster_4       | cluster_3      | 3266              | 3446              | 3354              | 7326             | 7312             | 6985             | 2.148             |
| Myrf                                          | 5<FC>2        | cluster_4       | cluster_3      | 31                | 7                 | 33                | 44               | 115              | 87               | 3.512             |
| Panx3                                         | 5<FC>2        | cluster_4       | cluster_3      | 6656              | 6491              | 5679              | 19668            | 18083            | 18794            | 3.004             |
| Srpx2                                         | 5<FC>2        | cluster_4       | cluster_3      | 3143              | 2971              | 2767              | 6959             | 6245             | 6772             | 2.25              |
| Tbc1d8                                        | 5<FC>2        | cluster_4       | cluster_3      | 12                | 15                | 19                | 63               | 80               | 70               | 4.613             |
| Tmem119                                       | 5<FC>2        | cluster_4       | cluster_3      | 4964              | 6229              | 7776              | 17045            | 21358            | 19374            | 3.045             |
| Tubb3                                         | 5<FC>2        | cluster_4       | cluster_3      | 529               | 637               | 723               | 2362             | 3033             | 2558             | 4.206             |
| 5<FC>2, H3K27me3 cluster 4, H3K4me3 cluster 4 |               |                 |                |                   |                   |                   |                  |                  |                  |                   |
| <b>Id</b>                                     | <b>RNAseq</b> | <b>H3K27me3</b> | <b>H3K4me3</b> | <b>norm.dms01</b> | <b>norm.dms02</b> | <b>norm.dms03</b> | <b>norm.epz1</b> | <b>norm.epz2</b> | <b>norm.epz3</b> | <b>FoldChange</b> |
| 5730508B09R                                   | 5<FC>2        | cluster_4       | cluster_4      | 43                | 36                | 34                | 111              | 100              | 109              | 2.837             |
| Abca5                                         | 5<FC>2        | cluster_4       | cluster_4      | 315               | 215               | 215               | 593              | 533              | 521              | 2.216             |
| Adam12                                        | 5<FC>2        | cluster_4       | cluster_4      | 208               | 189               | 224               | 632              | 664              | 589              | 3.037             |
| Ahrr                                          | 5<FC>2        | cluster_4       | cluster_4      | 467               | 412               | 408               | 916              | 846              | 909              | 2.077             |
| Alpl                                          | 5<FC>2        | cluster_4       | cluster_4      | 862               | 967               | 958               | 1930             | 2259             | 2178             | 2.283             |
| Als2cl                                        | 5<FC>2        | cluster_4       | cluster_4      | 425               | 448               | 677               | 980              | 1248             | 1046             | 2.11              |
| Angpt1                                        | 5<FC>2        | cluster_4       | cluster_4      | 43                | 56                | 30                | 232              | 199              | 139              | 4.439             |
| Ano3                                          | 5<FC>2        | cluster_4       | cluster_4      | 83                | 138               | 109               | 406              | 325              | 277              | 3.048             |
| Armcx4                                        | 5<FC>2        | cluster_4       | cluster_4      | 894               | 899               | 973               | 2598             | 2566             | 2461             | 2.755             |
| Bglap                                         | 5<FC>2        | cluster_4       | cluster_4      | 142               | 179               | 163               | 582              | 586              | 476              | 3.392             |
| Bglap2                                        | 5<FC>2        | cluster_4       | cluster_4      | 401               | 441               | 567               | 1232             | 2083             | 1431             | 3.366             |
| C4a                                           | 5<FC>2        | cluster_4       | cluster_4      | 17                | 21                | 20                | 52               | 46               | 55               | 2.644             |
| Camk2b                                        | 5<FC>2        | cluster_4       | cluster_4      | 263               | 208               | 239               | 840              | 885              | 702              | 3.419             |
| Cgref1                                        | 5<FC>2        | cluster_4       | cluster_4      | 1520              | 1366              | 1576              | 4287             | 4680             | 4499             | 3.018             |
| Chn1                                          | 5<FC>2        | cluster_4       | cluster_4      | 266               | 220               | 203               | 609              | 475              | 550              | 2.377             |
| Cobll1                                        | 5<FC>2        | cluster_4       | cluster_4      | 93                | 156               | 141               | 267              | 231              | 287              | 2.008             |
| Cpe                                           | 5<FC>2        | cluster_4       | cluster_4      | 4456              | 3789              | 3434              | 8347             | 7575             | 7763             | 2.029             |
| Creb3l3                                       | 5<FC>2        | cluster_4       | cluster_4      | 67                | 120               | 106               | 381              | 544              | 404              | 4.519             |
| Cys1                                          | 5<FC>2        | cluster_4       | cluster_4      | 8                 | 17                | 16                | 35               | 42               | 63               | 3.429             |
| Dmxl2                                         | 5<FC>2        | cluster_4       | cluster_4      | 200               | 232               | 176               | 427              | 455              | 342              | 2.016             |

|          |            |           |           |      |      |      |       |       |       |       |
|----------|------------|-----------|-----------|------|------|------|-------|-------|-------|-------|
| Dock10   | 5 < FC > 2 | cluster_4 | cluster_4 | 174  | 198  | 161  | 475   | 404   | 374   | 2.353 |
| F8a      | 5 < FC > 2 | cluster_4 | cluster_4 | 41   | 27   | 46   | 73    | 83    | 86    | 2.112 |
| Fam20a   | 5 < FC > 2 | cluster_4 | cluster_4 | 431  | 588  | 582  | 1289  | 1389  | 1249  | 2.449 |
| Fxyd5    | 5 < FC > 2 | cluster_4 | cluster_4 | 350  | 315  | 362  | 713   | 699   | 759   | 2.115 |
| Gngt2    | 5 < FC > 2 | cluster_4 | cluster_4 | 12   | 21   | 16   | 71    | 83    | 84    | 4.844 |
| Gykl1    | 5 < FC > 2 | cluster_4 | cluster_4 | 24   | 20   | 12   | 75    | 59    | 54    | 3.41  |
| Hapln1   | 5 < FC > 2 | cluster_4 | cluster_4 | 689  | 685  | 657  | 1659  | 1610  | 1495  | 2.346 |
| Hr       | 5 < FC > 2 | cluster_4 | cluster_4 | 59   | 106  | 51   | 148   | 191   | 261   | 2.777 |
| Iqgap2   | 5 < FC > 2 | cluster_4 | cluster_4 | 47   | 46   | 16   | 84    | 149   | 100   | 3.095 |
| Kcnf1    | 5 < FC > 2 | cluster_4 | cluster_4 | 50   | 45   | 42   | 112   | 88    | 128   | 2.39  |
| Lrrc30   | 5 < FC > 2 | cluster_4 | cluster_4 | 15   | 9    | 14   | 71    | 60    | 51    | 4.842 |
| Macc1    | 5 < FC > 2 | cluster_4 | cluster_4 | 16   | 12   | 20   | 71    | 45    | 29    | 3.02  |
| Matn3    | 5 < FC > 2 | cluster_4 | cluster_4 | 61   | 71   | 34   | 171   | 245   | 192   | 3.68  |
| Me2      | 5 < FC > 2 | cluster_4 | cluster_4 | 1683 | 1770 | 1690 | 3531  | 3380  | 3534  | 2.031 |
| Mef2c    | 5 < FC > 2 | cluster_4 | cluster_4 | 2294 | 1970 | 1697 | 4795  | 4152  | 4920  | 2.328 |
| Megf10   | 5 < FC > 2 | cluster_4 | cluster_4 | 150  | 207  | 139  | 530   | 569   | 423   | 3.065 |
| Morc4    | 5 < FC > 2 | cluster_4 | cluster_4 | 595  | 588  | 427  | 1407  | 1356  | 1418  | 2.6   |
| Nrip3    | 5 < FC > 2 | cluster_4 | cluster_4 | 9    | 20   | 11   | 67    | 42    | 42    | 3.842 |
| Olfm2    | 5 < FC > 2 | cluster_4 | cluster_4 | 94   | 143  | 101  | 237   | 260   | 238   | 2.177 |
| Pdgfa    | 5 < FC > 2 | cluster_4 | cluster_4 | 1812 | 2194 | 2673 | 6012  | 7480  | 6592  | 3.006 |
| Plag1    | 5 < FC > 2 | cluster_4 | cluster_4 | 233  | 188  | 175  | 526   | 466   | 423   | 2.382 |
| Ppfibp2  | 5 < FC > 2 | cluster_4 | cluster_4 | 274  | 260  | 256  | 908   | 754   | 709   | 3.005 |
| Ppm1e    | 5 < FC > 2 | cluster_4 | cluster_4 | 156  | 174  | 112  | 344   | 343   | 364   | 2.383 |
| Prickle1 | 5 < FC > 2 | cluster_4 | cluster_4 | 359  | 330  | 439  | 863   | 944   | 743   | 2.26  |
| Prkaa2   | 5 < FC > 2 | cluster_4 | cluster_4 | 75   | 141  | 123  | 604   | 536   | 532   | 4.906 |
| Proser2  | 5 < FC > 2 | cluster_4 | cluster_4 | 99   | 87   | 123  | 253   | 279   | 196   | 2.356 |
| Prss50   | 5 < FC > 2 | cluster_4 | cluster_4 | 3    | 6    | 15   | 41    | 37    | 43    | 4.893 |
| Ptgrn    | 5 < FC > 2 | cluster_4 | cluster_4 | 1057 | 1113 | 1285 | 2766  | 3007  | 2867  | 2.499 |
| Pth1r    | 5 < FC > 2 | cluster_4 | cluster_4 | 3693 | 5094 | 6068 | 11845 | 15725 | 14102 | 2.805 |
| Ptprj    | 5 < FC > 2 | cluster_4 | cluster_4 | 772  | 972  | 843  | 2069  | 1632  | 1815  | 2.132 |
| Rgcc     | 5 < FC > 2 | cluster_4 | cluster_4 | 43   | 16   | 29   | 81    | 98    | 110   | 3.304 |
| Rhbdl2   | 5 < FC > 2 | cluster_4 | cluster_4 | 154  | 127  | 121  | 370   | 281   | 385   | 2.576 |
| Rnf43    | 5 < FC > 2 | cluster_4 | cluster_4 | 466  | 589  | 686  | 1485  | 1599  | 1593  | 2.683 |
| Robo2    | 5 < FC > 2 | cluster_4 | cluster_4 | 514  | 369  | 360  | 1695  | 1466  | 1470  | 3.732 |
| Scn3a    | 5 < FC > 2 | cluster_4 | cluster_4 | 1477 | 1319 | 1164 | 3323  | 3054  | 3012  | 2.372 |
| Sema6a   | 5 < FC > 2 | cluster_4 | cluster_4 | 581  | 656  | 645  | 2497  | 2402  | 2338  | 3.844 |
| Sgms2    | 5 < FC > 2 | cluster_4 | cluster_4 | 1495 | 1346 | 1374 | 5005  | 4505  | 4750  | 3.384 |
| Shb      | 5 < FC > 2 | cluster_4 | cluster_4 | 184  | 163  | 174  | 311   | 452   | 359   | 2.156 |
| Slc16a4  | 5 < FC > 2 | cluster_4 | cluster_4 | 325  | 343  | 208  | 858   | 752   | 740   | 2.687 |
| Slc22a23 | 5 < FC > 2 | cluster_4 | cluster_4 | 2    | 37   | 16   | 81    | 62    | 79    | 3.989 |
| Slc40a1  | 5 < FC > 2 | cluster_4 | cluster_4 | 141  | 108  | 131  | 201   | 288   | 297   | 2.076 |
| Slc7a11  | 5 < FC > 2 | cluster_4 | cluster_4 | 22   | 41   | 47   | 228   | 130   | 155   | 4.654 |
| Smim5    | 5 < FC > 2 | cluster_4 | cluster_4 | 20   | 4    | 11   | 38    | 34    | 48    | 3.38  |
| Snaip    | 5 < FC > 2 | cluster_4 | cluster_4 | 42   | 24   | 47   | 201   | 118   | 152   | 4.154 |
| Sorcs2   | 5 < FC > 2 | cluster_4 | cluster_4 | 2782 | 3271 | 4008 | 9352  | 11018 | 9616  | 2.98  |
| Sort1    | 5 < FC > 2 | cluster_4 | cluster_4 | 148  | 193  | 166  | 368   | 357   | 427   | 2.274 |
| Spns2    | 5 < FC > 2 | cluster_4 | cluster_4 | 404  | 455  | 445  | 1305  | 1248  | 1251  | 2.913 |
| St3gal1  | 5 < FC > 2 | cluster_4 | cluster_4 | 648  | 579  | 515  | 1271  | 1138  | 1290  | 2.124 |
| Stab1    | 5 < FC > 2 | cluster_4 | cluster_4 | 115  | 218  | 217  | 780   | 750   | 664   | 3.978 |
| Ston2    | 5 < FC > 2 | cluster_4 | cluster_4 | 27   | 21   | 31   | 114   | 93    | 47    | 3.23  |

|           |            |           |           |      |      |      |       |       |       |       |
|-----------|------------|-----------|-----------|------|------|------|-------|-------|-------|-------|
| Tcf7      | 5 < FC > 2 | cluster_4 | cluster_4 | 1483 | 1429 | 1505 | 5429  | 5436  | 5587  | 3.724 |
| Tmie      | 5 < FC > 2 | cluster_4 | cluster_4 | 195  | 204  | 257  | 538   | 562   | 452   | 2.361 |
| Tnfrsf11b | 5 < FC > 2 | cluster_4 | cluster_4 | 5064 | 4402 | 4152 | 17730 | 16027 | 17233 | 3.745 |
| Tppp3     | 5 < FC > 2 | cluster_4 | cluster_4 | 25   | 20   | 104  | 164   | 266   | 157   | 3.923 |
| Tspan7    | 5 < FC > 2 | cluster_4 | cluster_4 | 118  | 112  | 75   | 242   | 292   | 283   | 2.694 |
| Xlr       | 5 < FC > 2 | cluster_4 | cluster_4 | 17   | 16   | 17   | 59    | 75    | 48    | 3.684 |

**Table S3:** EPZ6438-induced genes listed in figure 3E that exhibited change in gene expression ( $2 < FC > 1.2$ ) by RNA-seq that correlated with a reduction in H3K27me3 and presence or increase in H3K4me3 by K-means clustering.

| 2<FC>1.2                                        |              |           |           |            |            |            |           |           |           |            |
|-------------------------------------------------|--------------|-----------|-----------|------------|------------|------------|-----------|-----------|-----------|------------|
| 2<FC>1.2, H3K27me3 cluster 1                    |              |           |           |            |            |            |           |           |           |            |
| 2<FC>1.2, H3K27me3 cluster 1, H3K4me3 cluster 3 |              |           |           |            |            |            |           |           |           |            |
| Id                                              | RNAseq       | H3K27me3  | H3K4me3   | norm.dms01 | norm.dms02 | norm.dms03 | norm.epz1 | norm.epz2 | norm.epz3 | FoldChange |
| Adamts14                                        | 2 < FC > 1.2 | cluster_1 | cluster_3 | 334        | 474        | 601        | 814       | 963       | 854       | 1.865      |
| Cacna1c                                         | 2 < FC > 1.2 | cluster_1 | cluster_3 | 1184       | 1276       | 1368       | 2071      | 1894      | 2171      | 1.602      |
| Fbln7                                           | 2 < FC > 1.2 | cluster_1 | cluster_3 | 50         | 65         | 55         | 98        | 130       | 103       | 1.956      |
| Hoxb9                                           | 2 < FC > 1.2 | cluster_1 | cluster_3 | 201        | 176        | 161        | 271       | 253       | 278       | 1.492      |
| Ndr4                                            | 2 < FC > 1.2 | cluster_1 | cluster_3 | 2588       | 2814       | 2704       | 3921      | 4016      | 3780      | 1.445      |
| Nipsnap1                                        | 2 < FC > 1.2 | cluster_1 | cluster_3 | 72         | 72         | 78         | 131       | 129       | 113       | 1.679      |
| Pax6                                            | 2 < FC > 1.2 | cluster_1 | cluster_3 | 160        | 194        | 220        | 365       | 270       | 291       | 1.61       |
| Pdk1                                            | 2 < FC > 1.2 | cluster_1 | cluster_3 | 605        | 487        | 552        | 924       | 1015      | 912       | 1.735      |
| Rerg                                            | 2 < FC > 1.2 | cluster_1 | cluster_3 | 1207       | 1029       | 1235       | 2019      | 2042      | 1961      | 1.735      |
| Specc1                                          | 2 < FC > 1.2 | cluster_1 | cluster_3 | 3546       | 3582       | 3759       | 5522      | 5577      | 5239      | 1.501      |
| 2<FC>1.2, H3K27me3 cluster 1, H3K4me3 cluster 4 |              |           |           |            |            |            |           |           |           |            |
| Id                                              | RNAseq       | H3K27me3  | H3K4me3   | norm.dms01 | norm.dms02 | norm.dms03 | norm.epz1 | norm.epz2 | norm.epz3 | FoldChange |
| Gli1                                            | 2 < FC > 1.2 | cluster_1 | cluster_4 | 56         | 116        | 92         | 117       | 146       | 90        | 1.339      |
| Dab2ip                                          | 2 < FC > 1.2 | cluster_1 | cluster_4 | 1681       | 2201       | 2935       | 3504      | 4232      | 3767      | 1.687      |
| Olfm1                                           | 2 < FC > 1.2 | cluster_1 | cluster_4 | 252        | 198        | 227        | 433       | 371       | 411       | 1.798      |
| Svop                                            | 2 < FC > 1.2 | cluster_1 | cluster_4 | 79         | 80         | 156        | 177       | 262       | 190       | 1.986      |
| 2<FC>1.2, H3K27me3 cluster 2                    |              |           |           |            |            |            |           |           |           |            |
| 2<FC>1.2, H3K27me3 cluster 2, H3K4me3 cluster 1 |              |           |           |            |            |            |           |           |           |            |
| Id                                              | RNAseq       | H3K27me3  | H3K4me3   | norm.dms01 | norm.dms02 | norm.dms03 | norm.epz1 | norm.epz2 | norm.epz3 | FoldChange |
| 1810055G02R                                     | 2 < FC > 1.2 | cluster_2 | cluster_1 | 3010       | 3450       | 3499       | 4170      | 4684      | 4417      | 1.332      |
| Acvr1b                                          | 2 < FC > 1.2 | cluster_2 | cluster_1 | 152        | 208        | 201        | 339       | 340       | 258       | 1.665      |
| Akap9                                           | 2 < FC > 1.2 | cluster_2 | cluster_1 | 2916       | 3186       | 2946       | 4518      | 3937      | 4106      | 1.388      |
| Axin2                                           | 2 < FC > 1.2 | cluster_2 | cluster_1 | 753        | 974        | 1173       | 1392      | 1805      | 1486      | 1.614      |
| Bahd1                                           | 2 < FC > 1.2 | cluster_2 | cluster_1 | 729        | 1029       | 1252       | 1409      | 1696      | 1581      | 1.556      |
| Chac1                                           | 2 < FC > 1.2 | cluster_2 | cluster_1 | 104        | 206        | 242        | 284       | 396       | 332       | 1.823      |
| Dnmt3a                                          | 2 < FC > 1.2 | cluster_2 | cluster_1 | 2135       | 2138       | 2527       | 3466      | 3988      | 3798      | 1.654      |
| Fam212b                                         | 2 < FC > 1.2 | cluster_2 | cluster_1 | 989        | 1039       | 1004       | 1508      | 1684      | 1507      | 1.55       |
| Gars                                            | 2 < FC > 1.2 | cluster_2 | cluster_1 | 13390      | 12439      | 10929      | 16262     | 14408     | 15674     | 1.261      |
| Hivep2                                          | 2 < FC > 1.2 | cluster_2 | cluster_1 | 404        | 489        | 413        | 753       | 730       | 741       | 1.703      |
| Jak2                                            | 2 < FC > 1.2 | cluster_2 | cluster_1 | 3006       | 2605       | 2483       | 4448      | 3919      | 4066      | 1.536      |
| Klf2                                            | 2 < FC > 1.2 | cluster_2 | cluster_1 | 208        | 203        | 288        | 391       | 515       | 450       | 1.938      |
| Mpp6                                            | 2 < FC > 1.2 | cluster_2 | cluster_1 | 1604       | 1518       | 1407       | 2773      | 2471      | 2473      | 1.704      |
| Nbas                                            | 2 < FC > 1.2 | cluster_2 | cluster_1 | 3376       | 3656       | 3577       | 4456      | 4392      | 4350      | 1.244      |
| Pla2g12a                                        | 2 < FC > 1.2 | cluster_2 | cluster_1 | 240        | 196        | 277        | 378       | 376       | 422       | 1.649      |
| Rbpms2                                          | 2 < FC > 1.2 | cluster_2 | cluster_1 | 61         | 98         | 79         | 143       | 149       | 153       | 1.86       |
| Rcl1                                            | 2 < FC > 1.2 | cluster_2 | cluster_1 | 2076       | 1949       | 2103       | 2472      | 2657      | 2598      | 1.261      |
| Reck                                            | 2 < FC > 1.2 | cluster_2 | cluster_1 | 2733       | 2827       | 2481       | 5341      | 5144      | 5149      | 1.944      |
| Smyd5                                           | 2 < FC > 1.2 | cluster_2 | cluster_1 | 3263       | 3209       | 3378       | 4424      | 4232      | 4239      | 1.309      |
| Tiam2                                           | 2 < FC > 1.2 | cluster_2 | cluster_1 | 3828       | 3994       | 3800       | 5040      | 5151      | 5157      | 1.321      |

| 2<FC>1.2, H3K27me3 cluster 2, H3K4me3 cluster 2 |              |           |           |            |            |            |           |           |           |            |
|-------------------------------------------------|--------------|-----------|-----------|------------|------------|------------|-----------|-----------|-----------|------------|
| Id                                              | RNAseq       | H3K27me3  | H3K4me3   | norm.dms01 | norm.dms02 | norm.dms03 | norm.epz1 | norm.epz2 | norm.epz3 | FoldChange |
| Acp6                                            | 2 < FC > 1.2 | cluster_2 | cluster_2 | 324        | 371        | 383        | 655       | 615       | 576       | 1.712      |
| Adam19                                          | 2 < FC > 1.2 | cluster_2 | cluster_2 | 430        | 572        | 534        | 1038      | 965       | 1065      | 1.994      |
| Arfgef2                                         | 2 < FC > 1.2 | cluster_2 | cluster_2 | 5282       | 5791       | 5789       | 7082      | 6849      | 6553      | 1.215      |
| Bcl7a                                           | 2 < FC > 1.2 | cluster_2 | cluster_2 | 165        | 172        | 184        | 235       | 305       | 325       | 1.659      |
| Cab39                                           | 2 < FC > 1.2 | cluster_2 | cluster_2 | 5449       | 4863       | 4644       | 6940      | 6326      | 6509      | 1.322      |
| Cacna2d1                                        | 2 < FC > 1.2 | cluster_2 | cluster_2 | 931        | 846        | 765        | 1273      | 1021      | 1132      | 1.348      |
| Ccdc134                                         | 2 < FC > 1.2 | cluster_2 | cluster_2 | 677        | 793        | 888        | 1034      | 1257      | 1128      | 1.45       |
| Chchd7                                          | 2 < FC > 1.2 | cluster_2 | cluster_2 | 516        | 593        | 556        | 1011      | 776       | 952       | 1.645      |
| Clint1                                          | 2 < FC > 1.2 | cluster_2 | cluster_2 | 7055       | 7415       | 7427       | 9664      | 9926      | 9604      | 1.333      |
| Cpox                                            | 2 < FC > 1.2 | cluster_2 | cluster_2 | 1292       | 1126       | 1019       | 1608      | 1676      | 1622      | 1.428      |
| Ddx39                                           | 2 < FC > 1.2 | cluster_2 | cluster_2 | 3664       | 3777       | 3760       | 4752      | 5141      | 5061      | 1.335      |
| Dnmt3b                                          | 2 < FC > 1.2 | cluster_2 | cluster_2 | 254        | 264        | 263        | 418       | 397       | 454       | 1.622      |
| Ebna1bp2                                        | 2 < FC > 1.2 | cluster_2 | cluster_2 | 2714       | 2553       | 2736       | 3154      | 3754      | 3462      | 1.296      |
| Foxo1                                           | 2 < FC > 1.2 | cluster_2 | cluster_2 | 492        | 508        | 419        | 734       | 611       | 632       | 1.394      |
| Gls2                                            | 2 < FC > 1.2 | cluster_2 | cluster_2 | 177        | 210        | 243        | 334       | 343       | 301       | 1.547      |
| Nmnat2                                          | 2 < FC > 1.2 | cluster_2 | cluster_2 | 752        | 837        | 701        | 997       | 1065      | 976       | 1.328      |
| P4ha2                                           | 2 < FC > 1.2 | cluster_2 | cluster_2 | 2369       | 2914       | 3135       | 4411      | 4758      | 4350      | 1.606      |
| Pi4k2b                                          | 2 < FC > 1.2 | cluster_2 | cluster_2 | 3790       | 3071       | 2961       | 4962      | 4281      | 4241      | 1.373      |
| Pkdcc                                           | 2 < FC > 1.2 | cluster_2 | cluster_2 | 370        | 540        | 702        | 902       | 1260      | 1038      | 1.983      |
| Plrg1                                           | 2 < FC > 1.2 | cluster_2 | cluster_2 | 3871       | 3574       | 3232       | 4555      | 4444      | 4575      | 1.272      |
| Ptar1                                           | 2 < FC > 1.2 | cluster_2 | cluster_2 | 537        | 489        | 402        | 758       | 765       | 828       | 1.648      |
| Rrp1b                                           | 2 < FC > 1.2 | cluster_2 | cluster_2 | 1550       | 1716       | 1753       | 2132      | 2305      | 2163      | 1.315      |
| Sh3rf1                                          | 2 < FC > 1.2 | cluster_2 | cluster_2 | 553        | 622        | 604        | 899       | 934       | 994       | 1.588      |
| Slc36a1                                         | 2 < FC > 1.2 | cluster_2 | cluster_2 | 1150       | 1436       | 1364       | 1975      | 2085      | 1950      | 1.521      |
| Snrpa1                                          | 2 < FC > 1.2 | cluster_2 | cluster_2 | 1615       | 1427       | 1508       | 2012      | 1914      | 1880      | 1.276      |
| St7                                             | 2 < FC > 1.2 | cluster_2 | cluster_2 | 1824       | 1479       | 1476       | 2506      | 2027      | 2256      | 1.421      |
| Tead2                                           | 2 < FC > 1.2 | cluster_2 | cluster_2 | 1668       | 1835       | 2212       | 2675      | 3043      | 3080      | 1.539      |
| Tfrc                                            | 2 < FC > 1.2 | cluster_2 | cluster_2 | 2345       | 2120       | 1813       | 2939      | 2612      | 2927      | 1.351      |
| Zbtb39                                          | 2 < FC > 1.2 | cluster_2 | cluster_2 | 787        | 922        | 917        | 1130      | 1089      | 1137      | 1.277      |
| Zbtb7c                                          | 2 < FC > 1.2 | cluster_2 | cluster_2 | 1507       | 1358       | 1714       | 2063      | 2035      | 1860      | 1.301      |
| 2<FC>1.2, H3K27me3 cluster 2, H3K4me3 cluster 3 |              |           |           |            |            |            |           |           |           |            |
| Id                                              | RNAseq       | H3K27me3  | H3K4me3   | norm.dms01 | norm.dms02 | norm.dms03 | norm.epz1 | norm.epz2 | norm.epz3 | FoldChange |
| 2700038G22R                                     | 2 < FC > 1.2 | cluster_2 | cluster_3 | 470        | 487        | 446        | 578       | 622       | 676       | 1.337      |
| Casc4                                           | 2 < FC > 1.2 | cluster_2 | cluster_3 | 1306       | 1081       | 944        | 1808      | 1439      | 1523      | 1.433      |
| Ccdc8                                           | 2 < FC > 1.2 | cluster_2 | cluster_3 | 253        | 407        | 502        | 495       | 755       | 714       | 1.688      |
| Cdkn1a                                          | 2 < FC > 1.2 | cluster_2 | cluster_3 | 9105       | 8839       | 10000      | 16685     | 18155     | 17770     | 1.883      |
| Cercam                                          | 2 < FC > 1.2 | cluster_2 | cluster_3 | 1098       | 1129       | 1496       | 1879      | 2363      | 2052      | 1.69       |
| Dennd2c                                         | 2 < FC > 1.2 | cluster_2 | cluster_3 | 259        | 227        | 226        | 483       | 436       | 454       | 1.933      |
| Ehd3                                            | 2 < FC > 1.2 | cluster_2 | cluster_3 | 1294       | 1533       | 1477       | 2762      | 2571      | 2566      | 1.834      |
| Gorasp2                                         | 2 < FC > 1.2 | cluster_2 | cluster_3 | 8813       | 8916       | 8852       | 10696     | 10505     | 11103     | 1.215      |
| Kdelr3                                          | 2 < FC > 1.2 | cluster_2 | cluster_3 | 8173       | 7100       | 6759       | 10692     | 9481      | 10109     | 1.375      |
| Lrrc20                                          | 2 < FC > 1.2 | cluster_2 | cluster_3 | 759        | 896        | 927        | 1044      | 1178      | 1187      | 1.32       |
| Mthfd2                                          | 2 < FC > 1.2 | cluster_2 | cluster_3 | 5370       | 5141       | 5112       | 7251      | 6933      | 6978      | 1.355      |
| Pabpc4                                          | 2 < FC > 1.2 | cluster_2 | cluster_3 | 1826       | 2286       | 2839       | 3238      | 4097      | 3638      | 1.578      |
| Ptp4a3                                          | 2 < FC > 1.2 | cluster_2 | cluster_3 | 718        | 1058       | 1224       | 1399      | 1835      | 1701      | 1.645      |
| Shroom1                                         | 2 < FC > 1.2 | cluster_2 | cluster_3 | 60         | 93         | 84         | 131       | 171       | 125       | 1.803      |
| Taf4b                                           | 2 < FC > 1.2 | cluster_2 | cluster_3 | 459        | 559        | 429        | 647       | 631       | 695       | 1.363      |
| Tcn2                                            | 2 < FC > 1.2 | cluster_2 | cluster_3 | 358        | 412        | 421        | 714       | 668       | 646       | 1.703      |



|                                                 |               |                 |                |                   |                   |                   |                  |                  |                  |                   |
|-------------------------------------------------|---------------|-----------------|----------------|-------------------|-------------------|-------------------|------------------|------------------|------------------|-------------------|
| Tspan11                                         | 2 < FC > 1.2  | cluster_2       | cluster_3      | 1067              | 1269              | 1438              | 1644             | 1800             | 1663             | 1.352             |
| Vash1                                           | 2 < FC > 1.2  | cluster_2       | cluster_3      | 150               | 130               | 189               | 253              | 262              | 334              | 1.806             |
| 2<FC>1.2, H3K27me3 cluster 2, H3K4me3 cluster 4 |               |                 |                |                   |                   |                   |                  |                  |                  |                   |
| <b>Id</b>                                       | <b>RNAseq</b> | <b>H3K27me3</b> | <b>H3K4me3</b> | <b>norm.dms01</b> | <b>norm.dms02</b> | <b>norm.dms03</b> | <b>norm.epz1</b> | <b>norm.epz2</b> | <b>norm.epz3</b> | <b>FoldChange</b> |
| Arhgap29                                        | 2 < FC > 1.2  | cluster_2       | cluster_4      | 1977              | 1823              | 1653              | 2610             | 2383             | 2807             | 1.431             |
| Frm4a                                           | 2 < FC > 1.2  | cluster_2       | cluster_4      | 1713              | 1471              | 1673              | 2247             | 2039             | 2102             | 1.315             |
| Klf8                                            | 2 < FC > 1.2  | cluster_2       | cluster_4      | 141               | 108               | 139               | 240              | 195              | 235              | 1.726             |
| 2<FC>1.2, H3K27me3 cluster 3                    |               |                 |                |                   |                   |                   |                  |                  |                  |                   |
| 2<FC>1.2, H3K27me3 cluster 3, H3K4me3 cluster 1 |               |                 |                |                   |                   |                   |                  |                  |                  |                   |
| <b>Id</b>                                       | <b>RNAseq</b> | <b>H3K27me3</b> | <b>H3K4me3</b> | <b>norm.dms01</b> | <b>norm.dms02</b> | <b>norm.dms03</b> | <b>norm.epz1</b> | <b>norm.epz2</b> | <b>norm.epz3</b> | <b>FoldChange</b> |
| Apba1                                           | 2 < FC > 1.2  | cluster_3       | cluster_1      | 466               | 485               | 375               | 685              | 687              | 783              | 1.626             |
| Pla2g16                                         | 2 < FC > 1.2  | cluster_3       | cluster_1      | 5223              | 5075              | 5332              | 7575             | 7939             | 7616             | 1.48              |
| 2<FC>1.2, H3K27me3 cluster 3, H3K4me3 cluster 2 |               |                 |                |                   |                   |                   |                  |                  |                  |                   |
| <b>Id</b>                                       | <b>RNAseq</b> | <b>H3K27me3</b> | <b>H3K4me3</b> | <b>norm.dms01</b> | <b>norm.dms02</b> | <b>norm.dms03</b> | <b>norm.epz1</b> | <b>norm.epz2</b> | <b>norm.epz3</b> | <b>FoldChange</b> |
| Col15a1                                         | 2 < FC > 1.2  | cluster_3       | cluster_2      | 3098              | 3408              | 4205              | 5159             | 6303             | 5403             | 1.574             |
| Gprc5c                                          | 2 < FC > 1.2  | cluster_3       | cluster_2      | 1372              | 1449              | 1531              | 2397             | 2463             | 2441             | 1.677             |
| Hapln4                                          | 2 < FC > 1.2  | cluster_3       | cluster_2      | 1148              | 1096              | 1106              | 1663             | 1391             | 1397             | 1.329             |
| Neurl1b                                         | 2 < FC > 1.2  | cluster_3       | cluster_2      | 271               | 299               | 304               | 409              | 414              | 435              | 1.436             |
| Plcl1                                           | 2 < FC > 1.2  | cluster_3       | cluster_2      | 125               | 144               | 135               | 241              | 237              | 252              | 1.807             |
| 2<FC>1.2, H3K27me3 cluster 3, H3K4me3 cluster 3 |               |                 |                |                   |                   |                   |                  |                  |                  |                   |
| <b>Id</b>                                       | <b>RNAseq</b> | <b>H3K27me3</b> | <b>H3K4me3</b> | <b>norm.dms01</b> | <b>norm.dms02</b> | <b>norm.dms03</b> | <b>norm.epz1</b> | <b>norm.epz2</b> | <b>norm.epz3</b> | <b>FoldChange</b> |
| Cd1d1                                           | 2 < FC > 1.2  | cluster_3       | cluster_3      | 203               | 130               | 153               | 269              | 280              | 259              | 1.663             |
| Cenpv                                           | 2 < FC > 1.2  | cluster_3       | cluster_3      | 173               | 159               | 210               | 241              | 277              | 337              | 1.576             |
| Dennd5b                                         | 2 < FC > 1.2  | cluster_3       | cluster_3      | 506               | 454               | 466               | 689              | 730              | 692              | 1.482             |
| Dusp23                                          | 2 < FC > 1.2  | cluster_3       | cluster_3      | 77                | 59                | 101               | 126              | 149              | 151              | 1.799             |
| Ephb2                                           | 2 < FC > 1.2  | cluster_3       | cluster_3      | 611               | 740               | 721               | 1139             | 1502             | 1295             | 1.899             |
| Fxyd1                                           | 2 < FC > 1.2  | cluster_3       | cluster_3      | 417               | 574               | 697               | 800              | 1031             | 856              | 1.589             |
| Kirrel3                                         | 2 < FC > 1.2  | cluster_3       | cluster_3      | 83                | 76                | 101               | 159              | 169              | 191              | 1.987             |
| Pdlim1                                          | 2 < FC > 1.2  | cluster_3       | cluster_3      | 948               | 963               | 1035              | 1763             | 1889             | 1987             | 1.914             |
| Tes                                             | 2 < FC > 1.2  | cluster_3       | cluster_3      | 86                | 144               | 126               | 234              | 232              | 209              | 1.89              |
| Wnt10a                                          | 2 < FC > 1.2  | cluster_3       | cluster_3      | 478               | 578               | 712               | 1073             | 1091             | 1086             | 1.836             |
| 2<FC>1.2, H3K27me3 cluster 3, H3K4me3 cluster 4 |               |                 |                |                   |                   |                   |                  |                  |                  |                   |
| <b>Id</b>                                       | <b>RNAseq</b> | <b>H3K27me3</b> | <b>H3K4me3</b> | <b>norm.dms01</b> | <b>norm.dms02</b> | <b>norm.dms03</b> | <b>norm.epz1</b> | <b>norm.epz2</b> | <b>norm.epz3</b> | <b>FoldChange</b> |
| 5031414D18R                                     | 2 < FC > 1.2  | cluster_3       | cluster_4      | 74                | 82                | 77                | 206              | 121              | 120              | 1.919             |
| Adarb1                                          | 2 < FC > 1.2  | cluster_3       | cluster_4      | 579               | 545               | 633               | 829              | 876              | 898              | 1.481             |
| Cdk18                                           | 2 < FC > 1.2  | cluster_3       | cluster_4      | 215               | 292               | 353               | 491              | 559              | 465              | 1.76              |
| Chchd4                                          | 2 < FC > 1.2  | cluster_3       | cluster_4      | 954               | 1036              | 958               | 1197             | 1325             | 1257             | 1.282             |
| Des                                             | 2 < FC > 1.2  | cluster_3       | cluster_4      | 94                | 101               | 148               | 201              | 255              | 209              | 1.932             |
| Epdr1                                           | 2 < FC > 1.2  | cluster_3       | cluster_4      | 1619              | 1589              | 1576              | 2449             | 2351             | 2349             | 1.495             |
| Etl4                                            | 2 < FC > 1.2  | cluster_3       | cluster_4      | 4393              | 4854              | 4616              | 5842             | 5428             | 5889             | 1.238             |
| Fam180a                                         | 2 < FC > 1.2  | cluster_3       | cluster_4      | 211               | 148               | 169               | 267              | 264              | 302              | 1.579             |
| Iffo2                                           | 2 < FC > 1.2  | cluster_3       | cluster_4      | 1272              | 1283              | 1269              | 1627             | 1634             | 1642             | 1.282             |
| Igf2bp2                                         | 2 < FC > 1.2  | cluster_3       | cluster_4      | 652               | 648               | 675               | 1203             | 1071             | 1298             | 1.808             |
| Igf2r                                           | 2 < FC > 1.2  | cluster_3       | cluster_4      | 14303             | 15637             | 15194             | 18952            | 18675            | 18743            | 1.249             |
| Larp1b                                          | 2 < FC > 1.2  | cluster_3       | cluster_4      | 221               | 197               | 190               | 360              | 371              | 390              | 1.849             |
| Lman1                                           | 2 < FC > 1.2  | cluster_3       | cluster_4      | 8331              | 7875              | 7316              | 10570            | 9495             | 9925             | 1.275             |
| Mreg                                            | 2 < FC > 1.2  | cluster_3       | cluster_4      | 107               | 96                | 146               | 225              | 192              | 194              | 1.744             |
| Ncam1                                           | 2 < FC > 1.2  | cluster_3       | cluster_4      | 2140              | 2452              | 2573              | 2967             | 2989             | 3110             | 1.265             |
| Nr4a2                                           | 2 < FC > 1.2  | cluster_3       | cluster_4      | 332               | 239               | 280               | 472              | 424              | 489              | 1.63              |
| Ogfrl1                                          | 2 < FC > 1.2  | cluster_3       | cluster_4      | 384               | 322               | 353               | 453              | 490              | 561              | 1.421             |

|         |              |           |           |      |      |      |      |       |       |       |
|---------|--------------|-----------|-----------|------|------|------|------|-------|-------|-------|
| Pag1    | 2 < FC > 1.2 | cluster_3 | cluster_4 | 471  | 442  | 362  | 599  | 610   | 569   | 1.397 |
| Pde4dip | 2 < FC > 1.2 | cluster_3 | cluster_4 | 3723 | 3820 | 3789 | 5610 | 5469  | 5657  | 1.477 |
| Pgbd5   | 2 < FC > 1.2 | cluster_3 | cluster_4 | 100  | 162  | 119  | 233  | 253   | 271   | 1.981 |
| Phc2    | 2 < FC > 1.2 | cluster_3 | cluster_4 | 1476 | 1992 | 2246 | 2398 | 2867  | 2771  | 1.406 |
| Plce1   | 2 < FC > 1.2 | cluster_3 | cluster_4 | 151  | 101  | 97   | 233  | 246   | 197   | 1.945 |
| Pmepa1  | 2 < FC > 1.2 | cluster_3 | cluster_4 | 734  | 805  | 914  | 1370 | 1634  | 1365  | 1.781 |
| Ppp1r3b | 2 < FC > 1.2 | cluster_3 | cluster_4 | 570  | 565  | 595  | 1178 | 1053  | 1124  | 1.939 |
| Prr5l   | 2 < FC > 1.2 | cluster_3 | cluster_4 | 678  | 702  | 801  | 1227 | 1347  | 1298  | 1.775 |
| Qsox2   | 2 < FC > 1.2 | cluster_3 | cluster_4 | 1865 | 1866 | 1933 | 2320 | 2408  | 2418  | 1.262 |
| Rap1gap | 2 < FC > 1.2 | cluster_3 | cluster_4 | 885  | 1080 | 1460 | 1491 | 2137  | 1799  | 1.584 |
| Rcan1   | 2 < FC > 1.2 | cluster_3 | cluster_4 | 1067 | 1044 | 966  | 1349 | 1310  | 1290  | 1.284 |
| Shc2    | 2 < FC > 1.2 | cluster_3 | cluster_4 | 637  | 796  | 940  | 1089 | 1236  | 1176  | 1.474 |
| Slc7a1  | 2 < FC > 1.2 | cluster_3 | cluster_4 | 4482 | 5023 | 4867 | 6601 | 6708  | 6791  | 1.398 |
| Tbc1d16 | 2 < FC > 1.2 | cluster_3 | cluster_4 | 718  | 815  | 906  | 1628 | 1688  | 1552  | 1.994 |
| Tet1    | 2 < FC > 1.2 | cluster_3 | cluster_4 | 746  | 748  | 630  | 991  | 848   | 1007  | 1.34  |
| Tigar   | 2 < FC > 1.2 | cluster_3 | cluster_4 | 335  | 277  | 272  | 445  | 451   | 464   | 1.543 |
| Unc5b   | 2 < FC > 1.2 | cluster_3 | cluster_4 | 4929 | 6154 | 7221 | 9621 | 12228 | 10554 | 1.77  |

**2<FC>1.2, H3K27me3 cluster 4**

**2<FC>1.2, H3K27me3 cluster 4, H3K4me3 cluster 1**

| Id       | RNAseq       | H3K27me3  | H3K4me3   | norm.dms01 | norm.dms02 | norm.dms03 | norm.epz1 | norm.epz2 | norm.epz3 | FoldChange |
|----------|--------------|-----------|-----------|------------|------------|------------|-----------|-----------|-----------|------------|
| Abl2     | 2 < FC > 1.2 | cluster_4 | cluster_1 | 2186       | 2173       | 2206       | 2715      | 2494      | 3089      | 1.264      |
| Adamts12 | 2 < FC > 1.2 | cluster_4 | cluster_1 | 2873       | 2842       | 2569       | 3403      | 3438      | 3273      | 1.221      |
| Arfgap1  | 2 < FC > 1.2 | cluster_4 | cluster_1 | 7351       | 8306       | 8960       | 10334     | 11897     | 11467     | 1.369      |
| Arhgap24 | 2 < FC > 1.2 | cluster_4 | cluster_1 | 1185       | 1262       | 1185       | 1823      | 1600      | 1531      | 1.363      |
| Bmp2k    | 2 < FC > 1.2 | cluster_4 | cluster_1 | 2048       | 1916       | 1793       | 2899      | 2497      | 2654      | 1.398      |
| Ccdc6    | 2 < FC > 1.2 | cluster_4 | cluster_1 | 3669       | 3548       | 3338       | 4533      | 4035      | 4485      | 1.237      |
| Cryab    | 2 < FC > 1.2 | cluster_4 | cluster_1 | 5649       | 7147       | 7628       | 8661      | 10213     | 9323      | 1.38       |
| Dusp7    | 2 < FC > 1.2 | cluster_4 | cluster_1 | 808        | 1005       | 1265       | 1358      | 1625      | 1493      | 1.453      |
| Dysf     | 2 < FC > 1.2 | cluster_4 | cluster_1 | 4044       | 4539       | 4657       | 6907      | 7356      | 7519      | 1.645      |
| Emx2     | 2 < FC > 1.2 | cluster_4 | cluster_1 | 293        | 301        | 361        | 510       | 447       | 450       | 1.471      |
| Fgfr3    | 2 < FC > 1.2 | cluster_4 | cluster_1 | 1578       | 2082       | 2537       | 3001      | 3815      | 3223      | 1.62       |
| Glcci1   | 2 < FC > 1.2 | cluster_4 | cluster_1 | 654        | 642        | 604        | 928       | 770       | 902       | 1.368      |
| Herpud1  | 2 < FC > 1.2 | cluster_4 | cluster_1 | 2659       | 2653       | 2680       | 3635      | 3630      | 3508      | 1.348      |
| Iscu     | 2 < FC > 1.2 | cluster_4 | cluster_1 | 1224       | 1200       | 1271       | 1520      | 1540      | 1519      | 1.239      |
| Klf9     | 2 < FC > 1.2 | cluster_4 | cluster_1 | 931        | 841        | 951        | 1191      | 1096      | 1244      | 1.296      |
| Lrrc59   | 2 < FC > 1.2 | cluster_4 | cluster_1 | 14854      | 14266      | 14854      | 20339     | 21225     | 21003     | 1.423      |
| Metrnl   | 2 < FC > 1.2 | cluster_4 | cluster_1 | 970        | 1219       | 1389       | 1745      | 1892      | 1945      | 1.559      |
| Nrp2     | 2 < FC > 1.2 | cluster_4 | cluster_1 | 28917      | 29396      | 28511      | 54690     | 52494     | 53896     | 1.855      |
| Phlda3   | 2 < FC > 1.2 | cluster_4 | cluster_1 | 3798       | 4316       | 4822       | 5443      | 5935      | 5162      | 1.278      |
| Plaur    | 2 < FC > 1.2 | cluster_4 | cluster_1 | 502        | 568        | 700        | 686       | 1085      | 916       | 1.517      |
| Prrc1    | 2 < FC > 1.2 | cluster_4 | cluster_1 | 3860       | 4197       | 4429       | 4974      | 5403      | 5345      | 1.259      |
| Rreb1    | 2 < FC > 1.2 | cluster_4 | cluster_1 | 1187       | 1415       | 1481       | 1734      | 1875      | 1793      | 1.322      |
| Sfr1     | 2 < FC > 1.2 | cluster_4 | cluster_1 | 14444      | 13782      | 13093      | 17216     | 17146     | 16831     | 1.239      |
| Sik3     | 2 < FC > 1.2 | cluster_4 | cluster_1 | 4005       | 4296       | 5124       | 5664      | 5917      | 5941      | 1.305      |
| Slc2a10  | 2 < FC > 1.2 | cluster_4 | cluster_1 | 2306       | 2177       | 2171       | 2762      | 2700      | 2847      | 1.249      |
| Slc7a6   | 2 < FC > 1.2 | cluster_4 | cluster_1 | 5004       | 4934       | 4236       | 6082      | 5714      | 5840      | 1.244      |
| Smg5     | 2 < FC > 1.2 | cluster_4 | cluster_1 | 4098       | 5002       | 5363       | 5958      | 6763      | 6118      | 1.302      |
| Tgfb1    | 2 < FC > 1.2 | cluster_4 | cluster_1 | 946        | 1111       | 1296       | 1426      | 1685      | 1656      | 1.42       |
| Tob1     | 2 < FC > 1.2 | cluster_4 | cluster_1 | 1950       | 1908       | 1942       | 2420      | 2402      | 2372      | 1.241      |
| Tpst2    | 2 < FC > 1.2 | cluster_4 | cluster_1 | 619        | 763        | 994        | 967       | 1366      | 1183      | 1.479      |

| Usp6nl                                              | 2 < FC > 1.2 | cluster_4 | cluster_1 | 1582       | 1563       | 1711       | 2381      | 2204      | 2337      | 1.425      |
|-----------------------------------------------------|--------------|-----------|-----------|------------|------------|------------|-----------|-----------|-----------|------------|
| Vldlr                                               | 2 < FC > 1.2 | cluster_4 | cluster_1 | 7615       | 6631       | 6091       | 13386     | 11276     | 11709     | 1.789      |
| 2 < FC > 1.2, H3K27me3 cluster 4, H3K4me3 cluster 2 |              |           |           |            |            |            |           |           |           |            |
| id                                                  | RNAseq       | H3K27me3  | H3K4me3   | norm.dms01 | norm.dms02 | norm.dms03 | norm.epz1 | norm.epz2 | norm.epz3 | FoldChange |
| Aen                                                 | 2 < FC > 1.2 | cluster_4 | cluster_2 | 1611       | 2294       | 2534       | 2782      | 3571      | 3137      | 1.473      |
| Agap1                                               | 2 < FC > 1.2 | cluster_4 | cluster_2 | 1235       | 1359       | 1504       | 2182      | 2476      | 2394      | 1.72       |
| Amacr                                               | 2 < FC > 1.2 | cluster_4 | cluster_2 | 1112       | 1002       | 1132       | 2159      | 2104      | 2121      | 1.967      |
| Ano6                                                | 2 < FC > 1.2 | cluster_4 | cluster_2 | 7900       | 8260       | 7578       | 12905     | 11210     | 11630     | 1.506      |
| Ap1s2                                               | 2 < FC > 1.2 | cluster_4 | cluster_2 | 904        | 683        | 534        | 1357      | 1046      | 1221      | 1.71       |
| Armxc3                                              | 2 < FC > 1.2 | cluster_4 | cluster_2 | 572        | 531        | 552        | 773       | 975       | 781       | 1.529      |
| Bcor1                                               | 2 < FC > 1.2 | cluster_4 | cluster_2 | 476        | 676        | 587        | 772       | 961       | 903       | 1.515      |
| Bend3                                               | 2 < FC > 1.2 | cluster_4 | cluster_2 | 956        | 992        | 1060       | 1247      | 1298      | 1315      | 1.283      |
| Bhlhe40                                             | 2 < FC > 1.2 | cluster_4 | cluster_2 | 3276       | 3372       | 3374       | 4617      | 4261      | 4265      | 1.311      |
| Chsy1                                               | 2 < FC > 1.2 | cluster_4 | cluster_2 | 2980       | 3118       | 2902       | 4117      | 3956      | 4018      | 1.344      |
| Col11a1                                             | 2 < FC > 1.2 | cluster_4 | cluster_2 | 26632      | 30592      | 32502      | 43125     | 50357     | 43714     | 1.529      |
| D11Wsu47e                                           | 2 < FC > 1.2 | cluster_4 | cluster_2 | 772        | 709        | 750        | 1087      | 1112      | 960       | 1.416      |
| Dact1                                               | 2 < FC > 1.2 | cluster_4 | cluster_2 | 1366       | 1283       | 1250       | 2002      | 1692      | 1784      | 1.405      |
| Dot1l                                               | 2 < FC > 1.2 | cluster_4 | cluster_2 | 1352       | 1938       | 2695       | 2573      | 3569      | 3041      | 1.534      |
| Ece1                                                | 2 < FC > 1.2 | cluster_4 | cluster_2 | 4519       | 5700       | 6348       | 7137      | 8381      | 7445      | 1.386      |
| Eef2k                                               | 2 < FC > 1.2 | cluster_4 | cluster_2 | 3544       | 4150       | 4105       | 5383      | 6105      | 5761      | 1.462      |
| Eif2ak3                                             | 2 < FC > 1.2 | cluster_4 | cluster_2 | 2515       | 2700       | 2837       | 3917      | 3935      | 3590      | 1.421      |
| Eif4ebp1                                            | 2 < FC > 1.2 | cluster_4 | cluster_2 | 1358       | 1484       | 1765       | 1966      | 2453      | 2155      | 1.426      |
| Enox1                                               | 2 < FC > 1.2 | cluster_4 | cluster_2 | 298        | 377        | 371        | 512       | 532       | 581       | 1.552      |
| Fam131a                                             | 2 < FC > 1.2 | cluster_4 | cluster_2 | 463        | 633        | 777        | 948       | 1319      | 939       | 1.711      |
| Farp2                                               | 2 < FC > 1.2 | cluster_4 | cluster_2 | 3224       | 3386       | 3208       | 4597      | 4334      | 4562      | 1.374      |
| Fbxw7                                               | 2 < FC > 1.2 | cluster_4 | cluster_2 | 1099       | 1019       | 930        | 1485      | 1508      | 1295      | 1.408      |
| Fosl2                                               | 2 < FC > 1.2 | cluster_4 | cluster_2 | 5475       | 5667       | 5492       | 7182      | 6784      | 6366      | 1.222      |
| Gab2                                                | 2 < FC > 1.2 | cluster_4 | cluster_2 | 250        | 229        | 207        | 468       | 405       | 366       | 1.809      |
| Gale                                                | 2 < FC > 1.2 | cluster_4 | cluster_2 | 720        | 1035       | 1418       | 1507      | 2004      | 1583      | 1.604      |
| Gja1                                                | 2 < FC > 1.2 | cluster_4 | cluster_2 | 7714       | 7404       | 6917       | 9648      | 8848      | 8797      | 1.239      |
| Gmppb                                               | 2 < FC > 1.2 | cluster_4 | cluster_2 | 1151       | 1292       | 1567       | 1816      | 2229      | 1908      | 1.484      |
| Golga3                                              | 2 < FC > 1.2 | cluster_4 | cluster_2 | 4484       | 4980       | 4880       | 6282      | 6317      | 5806      | 1.283      |
| Greb1l                                              | 2 < FC > 1.2 | cluster_4 | cluster_2 | 858        | 775        | 606        | 1220      | 1051      | 1243      | 1.57       |
| Gsn                                                 | 2 < FC > 1.2 | cluster_4 | cluster_2 | 22683      | 28337      | 34856      | 37685     | 48573     | 41931     | 1.493      |
| Hyou1                                               | 2 < FC > 1.2 | cluster_4 | cluster_2 | 5224       | 5678       | 5420       | 6868      | 7253      | 6812      | 1.282      |
| Ift20                                               | 2 < FC > 1.2 | cluster_4 | cluster_2 | 1450       | 1536       | 1592       | 1959      | 2062      | 2014      | 1.318      |
| Inpp4a                                              | 2 < FC > 1.2 | cluster_4 | cluster_2 | 1641       | 1811       | 1740       | 2142      | 2233      | 2408      | 1.306      |
| Inpp5a                                              | 2 < FC > 1.2 | cluster_4 | cluster_2 | 1446       | 1443       | 1485       | 2493      | 2475      | 2682      | 1.749      |
| Isoc1                                               | 2 < FC > 1.2 | cluster_4 | cluster_2 | 1277       | 1165       | 1092       | 1476      | 1582      | 1517      | 1.295      |
| Jarid2                                              | 2 < FC > 1.2 | cluster_4 | cluster_2 | 704        | 653        | 709        | 1009      | 968       | 916       | 1.401      |
| Klhl25                                              | 2 < FC > 1.2 | cluster_4 | cluster_2 | 1063       | 1184       | 1335       | 1449      | 1892      | 1675      | 1.4        |
| Lbh                                                 | 2 < FC > 1.2 | cluster_4 | cluster_2 | 1759       | 1739       | 1931       | 2977      | 2958      | 3153      | 1.673      |
| Lef1                                                | 2 < FC > 1.2 | cluster_4 | cluster_2 | 139        | 113        | 194        | 257       | 333       | 287       | 1.966      |
| Lhfp12                                              | 2 < FC > 1.2 | cluster_4 | cluster_2 | 3228       | 3420       | 3173       | 6181      | 6124      | 5775      | 1.841      |
| Lifr                                                | 2 < FC > 1.2 | cluster_4 | cluster_2 | 6973       | 7062       | 5751       | 10662     | 8428      | 9529      | 1.446      |
| Lrba                                                | 2 < FC > 1.2 | cluster_4 | cluster_2 | 714        | 701        | 704        | 1046      | 822       | 910       | 1.311      |
| Lrp4                                                | 2 < FC > 1.2 | cluster_4 | cluster_2 | 8883       | 9507       | 10205      | 15454     | 16104     | 15706     | 1.653      |
| Lrrfip1                                             | 2 < FC > 1.2 | cluster_4 | cluster_2 | 5129       | 4439       | 4576       | 8064      | 7930      | 7858      | 1.687      |
| Mettl1                                              | 2 < FC > 1.2 | cluster_4 | cluster_2 | 994        | 1184       | 1361       | 1440      | 1663      | 1688      | 1.353      |
| Mgat5                                               | 2 < FC > 1.2 | cluster_4 | cluster_2 | 424        | 435        | 496        | 805       | 725       | 723       | 1.661      |

|         |              |           |           |       |       |       |       |       |       |       |
|---------|--------------|-----------|-----------|-------|-------|-------|-------|-------|-------|-------|
| Mon1b   | 2 < FC > 1.2 | cluster_4 | cluster_2 | 1360  | 1246  | 1363  | 1624  | 1729  | 1715  | 1.277 |
| Mrpl38  | 2 < FC > 1.2 | cluster_4 | cluster_2 | 916   | 1232  | 1307  | 1551  | 1558  | 1583  | 1.357 |
| Mybbp1a | 2 < FC > 1.2 | cluster_4 | cluster_2 | 14121 | 16146 | 17487 | 20348 | 22085 | 20698 | 1.322 |
| Myo19   | 2 < FC > 1.2 | cluster_4 | cluster_2 | 2085  | 2260  | 2461  | 3213  | 3351  | 2958  | 1.399 |
| Nhp2    | 2 < FC > 1.2 | cluster_4 | cluster_2 | 2598  | 2926  | 3397  | 3512  | 4364  | 3843  | 1.313 |
| Nr4a1   | 2 < FC > 1.2 | cluster_4 | cluster_2 | 814   | 986   | 1202  | 1500  | 1975  | 1697  | 1.722 |
| Nt5e    | 2 < FC > 1.2 | cluster_4 | cluster_2 | 1640  | 1189  | 1315  | 2715  | 2634  | 2568  | 1.912 |
| Nupr1   | 2 < FC > 1.2 | cluster_4 | cluster_2 | 1779  | 1726  | 1972  | 3240  | 3692  | 3324  | 1.873 |
| P3h1    | 2 < FC > 1.2 | cluster_4 | cluster_2 | 5078  | 6165  | 6484  | 8393  | 8550  | 8162  | 1.416 |
| Pard3b  | 2 < FC > 1.2 | cluster_4 | cluster_2 | 500   | 454   | 407   | 735   | 684   | 710   | 1.566 |
| Plcl2   | 2 < FC > 1.2 | cluster_4 | cluster_2 | 1891  | 1555  | 1499  | 2509  | 2502  | 2656  | 1.551 |
| Plekha1 | 2 < FC > 1.2 | cluster_4 | cluster_2 | 1687  | 1313  | 1466  | 2178  | 1913  | 2014  | 1.367 |
| Rnf144b | 2 < FC > 1.2 | cluster_4 | cluster_2 | 1976  | 2035  | 1793  | 2727  | 2383  | 2690  | 1.344 |
| Sec16b  | 2 < FC > 1.2 | cluster_4 | cluster_2 | 4991  | 5085  | 5056  | 6853  | 6355  | 6132  | 1.278 |
| Sec24d  | 2 < FC > 1.2 | cluster_4 | cluster_2 | 9162  | 9955  | 10005 | 12203 | 12166 | 12262 | 1.258 |
| Sipa1l1 | 2 < FC > 1.2 | cluster_4 | cluster_2 | 2864  | 3068  | 3224  | 3940  | 3760  | 3592  | 1.233 |
| Slit2   | 2 < FC > 1.2 | cluster_4 | cluster_2 | 8219  | 8246  | 7823  | 10471 | 10083 | 10729 | 1.288 |
| Snora68 | 2 < FC > 1.2 | cluster_4 | cluster_2 | 160   | 131   | 135   | 226   | 248   | 211   | 1.612 |
| Spata13 | 2 < FC > 1.2 | cluster_4 | cluster_2 | 1157  | 1324  | 1308  | 2263  | 2468  | 2374  | 1.875 |
| Srm     | 2 < FC > 1.2 | cluster_4 | cluster_2 | 2425  | 3153  | 3607  | 4474  | 4727  | 4686  | 1.511 |
| Srpr    | 2 < FC > 1.2 | cluster_4 | cluster_2 | 8000  | 7817  | 7431  | 9913  | 9250  | 9403  | 1.229 |
| Ssfa2   | 2 < FC > 1.2 | cluster_4 | cluster_2 | 2829  | 2774  | 2653  | 3904  | 3889  | 3806  | 1.405 |
| Stbd1   | 2 < FC > 1.2 | cluster_4 | cluster_2 | 409   | 438   | 390   | 667   | 743   | 683   | 1.693 |
| Stk10   | 2 < FC > 1.2 | cluster_4 | cluster_2 | 234   | 316   | 348   | 416   | 506   | 487   | 1.566 |
| Sun1    | 2 < FC > 1.2 | cluster_4 | cluster_2 | 5765  | 5775  | 6020  | 7401  | 7592  | 7028  | 1.254 |
| Tbc1d8b | 2 < FC > 1.2 | cluster_4 | cluster_2 | 3402  | 3372  | 2696  | 5059  | 4083  | 4530  | 1.444 |
| Thbd    | 2 < FC > 1.2 | cluster_4 | cluster_2 | 7929  | 9013  | 9751  | 12359 | 13728 | 12839 | 1.458 |
| Tmem43  | 2 < FC > 1.2 | cluster_4 | cluster_2 | 11958 | 12258 | 12333 | 15322 | 15428 | 14469 | 1.237 |
| Trabd2b | 2 < FC > 1.2 | cluster_4 | cluster_2 | 1266  | 1063  | 1153  | 1639  | 1591  | 1459  | 1.347 |
| Trim16  | 2 < FC > 1.2 | cluster_4 | cluster_2 | 1707  | 1727  | 1587  | 2230  | 2213  | 2075  | 1.299 |
| Uaca    | 2 < FC > 1.2 | cluster_4 | cluster_2 | 1217  | 1518  | 1434  | 1698  | 2041  | 1823  | 1.334 |
| Ube2f   | 2 < FC > 1.2 | cluster_4 | cluster_2 | 1488  | 1363  | 1257  | 1834  | 1786  | 1763  | 1.311 |
| Ube2g2  | 2 < FC > 1.2 | cluster_4 | cluster_2 | 2787  | 2961  | 3046  | 3745  | 4013  | 3704  | 1.303 |
| Wisp1   | 2 < FC > 1.2 | cluster_4 | cluster_2 | 3763  | 3555  | 3266  | 5016  | 4640  | 4814  | 1.367 |
| Xbp1    | 2 < FC > 1.2 | cluster_4 | cluster_2 | 4540  | 4060  | 4019  | 7352  | 6437  | 7140  | 1.659 |
| Zpr1    | 2 < FC > 1.2 | cluster_4 | cluster_2 | 1829  | 1751  | 1944  | 2363  | 2290  | 2162  | 1.233 |

2<FC>1.2, H3K27me3 cluster 4, H3K4me3 cluster 3

| Id          | RNAseq       | H3K27me3  | H3K4me3   | norm.dms01 | norm.dms02 | norm.dms03 | norm.epz1 | norm.epz2 | norm.epz3 | FoldChange |
|-------------|--------------|-----------|-----------|------------|------------|------------|-----------|-----------|-----------|------------|
| 4931406P16R | 2 < FC > 1.2 | cluster_4 | cluster_3 | 1855       | 2088       | 2066       | 2580      | 2618      | 2593      | 1.296      |
| Abcb6       | 2 < FC > 1.2 | cluster_4 | cluster_3 | 929        | 1084       | 981        | 1392      | 1619      | 1409      | 1.476      |
| Abhd15      | 2 < FC > 1.2 | cluster_4 | cluster_3 | 76         | 75         | 98         | 124       | 148       | 147       | 1.677      |
| Amigo3      | 2 < FC > 1.2 | cluster_4 | cluster_3 | 128        | 127        | 125        | 224       | 208       | 183       | 1.615      |
| Aqp1        | 2 < FC > 1.2 | cluster_4 | cluster_3 | 8809       | 8970       | 9494       | 16894     | 17887     | 17399     | 1.913      |
| Banf1       | 2 < FC > 1.2 | cluster_4 | cluster_3 | 8063       | 8293       | 8882       | 9747      | 10981     | 10142     | 1.223      |
| Bet1l       | 2 < FC > 1.2 | cluster_4 | cluster_3 | 1767       | 1819       | 2065       | 2306      | 2534      | 2303      | 1.264      |
| Bmp4        | 2 < FC > 1.2 | cluster_4 | cluster_3 | 1955       | 2432       | 2618       | 3161      | 3817      | 3624      | 1.513      |
| Btg2        | 2 < FC > 1.2 | cluster_4 | cluster_3 | 1267       | 1328       | 1276       | 1831      | 2015      | 1864      | 1.475      |
| Bysl        | 2 < FC > 1.2 | cluster_4 | cluster_3 | 1943       | 2368       | 2448       | 2883      | 3312      | 2930      | 1.35       |
| Ccdc112     | 2 < FC > 1.2 | cluster_4 | cluster_3 | 134        | 175        | 150        | 310       | 228       | 333       | 1.892      |
| Cdc20       | 2 < FC > 1.2 | cluster_4 | cluster_3 | 3251       | 3524       | 3980       | 4441      | 4539      | 4466      | 1.25       |

|          |              |           |           |       |       |       |       |       |       |       |
|----------|--------------|-----------|-----------|-------|-------|-------|-------|-------|-------|-------|
| Cux1     | 2 < FC > 1.2 | cluster_4 | cluster_3 | 2823  | 3131  | 3251  | 4030  | 4155  | 4137  | 1.338 |
| Dlx5     | 2 < FC > 1.2 | cluster_4 | cluster_3 | 553   | 657   | 939   | 961   | 1394  | 1300  | 1.699 |
| Dzip1l   | 2 < FC > 1.2 | cluster_4 | cluster_3 | 1339  | 1472  | 1700  | 1989  | 2011  | 2025  | 1.335 |
| Eno3     | 2 < FC > 1.2 | cluster_4 | cluster_3 | 2496  | 2959  | 3318  | 4130  | 4174  | 3884  | 1.389 |
| Fat1     | 2 < FC > 1.2 | cluster_4 | cluster_3 | 14429 | 16847 | 16669 | 20200 | 19666 | 20621 | 1.262 |
| Fkbp11   | 2 < FC > 1.2 | cluster_4 | cluster_3 | 1425  | 1487  | 1891  | 2432  | 3085  | 2744  | 1.719 |
| Fkbp5    | 2 < FC > 1.2 | cluster_4 | cluster_3 | 1474  | 1542  | 1552  | 1971  | 2106  | 2014  | 1.333 |
| Fst      | 2 < FC > 1.2 | cluster_4 | cluster_3 | 5819  | 5675  | 5095  | 7481  | 6648  | 6982  | 1.273 |
| Gps2     | 2 < FC > 1.2 | cluster_4 | cluster_3 | 1083  | 1322  | 1308  | 1524  | 1655  | 1640  | 1.298 |
| Hes1     | 2 < FC > 1.2 | cluster_4 | cluster_3 | 52    | 109   | 83    | 139   | 158   | 160   | 1.866 |
| Inhba    | 2 < FC > 1.2 | cluster_4 | cluster_3 | 1952  | 2064  | 2308  | 3615  | 3851  | 3745  | 1.772 |
| Itga10   | 2 < FC > 1.2 | cluster_4 | cluster_3 | 4997  | 5327  | 5340  | 8372  | 8182  | 7751  | 1.551 |
| Itga11   | 2 < FC > 1.2 | cluster_4 | cluster_3 | 3177  | 4067  | 4262  | 5552  | 6757  | 5974  | 1.589 |
| Itpripl1 | 2 < FC > 1.2 | cluster_4 | cluster_3 | 787   | 799   | 818   | 1077  | 1115  | 1064  | 1.354 |
| Kctd14   | 2 < FC > 1.2 | cluster_4 | cluster_3 | 311   | 291   | 337   | 428   | 525   | 498   | 1.546 |
| Klf4     | 2 < FC > 1.2 | cluster_4 | cluster_3 | 3643  | 3634  | 3829  | 6713  | 7169  | 7222  | 1.9   |
| Lyn      | 2 < FC > 1.2 | cluster_4 | cluster_3 | 1383  | 1291  | 1131  | 1854  | 1788  | 1855  | 1.445 |
| Map6     | 2 < FC > 1.2 | cluster_4 | cluster_3 | 982   | 1048  | 1106  | 1399  | 1535  | 1474  | 1.405 |
| Mapk12   | 2 < FC > 1.2 | cluster_4 | cluster_3 | 900   | 775   | 885   | 1178  | 1183  | 1106  | 1.354 |
| Mef2d    | 2 < FC > 1.2 | cluster_4 | cluster_3 | 1011  | 1274  | 1491  | 1516  | 1863  | 1934  | 1.406 |
| Mir17hg  | 2 < FC > 1.2 | cluster_4 | cluster_3 | 165   | 110   | 151   | 247   | 266   | 209   | 1.701 |
| Mybl2    | 2 < FC > 1.2 | cluster_4 | cluster_3 | 546   | 596   | 712   | 826   | 1123  | 939   | 1.557 |
| Nav1     | 2 < FC > 1.2 | cluster_4 | cluster_3 | 1779  | 1790  | 2052  | 3681  | 3339  | 3383  | 1.85  |
| Pcolce2  | 2 < FC > 1.2 | cluster_4 | cluster_3 | 1587  | 1603  | 1769  | 2003  | 2126  | 2237  | 1.283 |
| Pfkfb4   | 2 < FC > 1.2 | cluster_4 | cluster_3 | 774   | 894   | 953   | 1345  | 1472  | 1386  | 1.602 |
| Pif1     | 2 < FC > 1.2 | cluster_4 | cluster_3 | 687   | 924   | 902   | 1119  | 1422  | 1258  | 1.511 |
| Plp2     | 2 < FC > 1.2 | cluster_4 | cluster_3 | 2281  | 2516  | 2381  | 3228  | 2990  | 3091  | 1.297 |
| Pogk     | 2 < FC > 1.2 | cluster_4 | cluster_3 | 1330  | 1391  | 1423  | 1829  | 1777  | 1837  | 1.313 |
| Ptgs1    | 2 < FC > 1.2 | cluster_4 | cluster_3 | 3503  | 3425  | 3210  | 4804  | 4220  | 4321  | 1.316 |
| Ptpn4    | 2 < FC > 1.2 | cluster_4 | cluster_3 | 836   | 846   | 677   | 1544  | 1329  | 1432  | 1.825 |
| Pus1     | 2 < FC > 1.2 | cluster_4 | cluster_3 | 910   | 1149  | 1339  | 1555  | 1812  | 1567  | 1.451 |
| Pycr1    | 2 < FC > 1.2 | cluster_4 | cluster_3 | 743   | 926   | 1130  | 1414  | 1888  | 1489  | 1.711 |
| Pygm     | 2 < FC > 1.2 | cluster_4 | cluster_3 | 133   | 76    | 131   | 177   | 217   | 183   | 1.699 |
| Rasl11a  | 2 < FC > 1.2 | cluster_4 | cluster_3 | 359   | 404   | 369   | 618   | 652   | 628   | 1.676 |
| Rcc1     | 2 < FC > 1.2 | cluster_4 | cluster_3 | 2202  | 2447  | 2617  | 2980  | 3477  | 3164  | 1.324 |
| Runx3    | 2 < FC > 1.2 | cluster_4 | cluster_3 | 1365  | 1448  | 1357  | 2040  | 2086  | 2248  | 1.528 |
| Secisbp2 | 2 < FC > 1.2 | cluster_4 | cluster_3 | 681   | 703   | 846   | 945   | 1061  | 943   | 1.321 |
| Sgca     | 2 < FC > 1.2 | cluster_4 | cluster_3 | 276   | 259   | 288   | 379   | 476   | 425   | 1.555 |
| Slc6a9   | 2 < FC > 1.2 | cluster_4 | cluster_3 | 849   | 1001  | 1145  | 1233  | 1419  | 1349  | 1.335 |
| Smpdl3b  | 2 < FC > 1.2 | cluster_4 | cluster_3 | 1517  | 1669  | 1632  | 2351  | 2616  | 2532  | 1.556 |
| Snhg18   | 2 < FC > 1.2 | cluster_4 | cluster_3 | 3181  | 2946  | 2815  | 4368  | 3710  | 4020  | 1.353 |
| Snhg7    | 2 < FC > 1.2 | cluster_4 | cluster_3 | 598   | 558   | 532   | 740   | 774   | 787   | 1.364 |
| Snta1    | 2 < FC > 1.2 | cluster_4 | cluster_3 | 1096  | 1678  | 1972  | 2426  | 3419  | 2977  | 1.858 |
| Sp7      | 2 < FC > 1.2 | cluster_4 | cluster_3 | 4456  | 4943  | 5401  | 8898  | 10374 | 9465  | 1.942 |
| Surf4    | 2 < FC > 1.2 | cluster_4 | cluster_3 | 22664 | 23738 | 24357 | 28870 | 28497 | 27955 | 1.206 |
| Thg1l    | 2 < FC > 1.2 | cluster_4 | cluster_3 | 547   | 582   | 612   | 789   | 817   | 819   | 1.392 |
| Tmem214  | 2 < FC > 1.2 | cluster_4 | cluster_3 | 4263  | 5308  | 6180  | 6890  | 8203  | 7544  | 1.437 |
| Tmem97   | 2 < FC > 1.2 | cluster_4 | cluster_3 | 3555  | 3217  | 3292  | 4928  | 4754  | 4532  | 1.413 |
| Trmt61a  | 2 < FC > 1.2 | cluster_4 | cluster_3 | 438   | 558   | 720   | 724   | 1020  | 833   | 1.501 |
| Wnt10b   | 2 < FC > 1.2 | cluster_4 | cluster_3 | 902   | 964   | 1060  | 1462  | 1595  | 1493  | 1.554 |

| Xaf1                                            | 2 < FC > 1.2 | cluster_4 | cluster_3 | 815        | 981        | 738        | 1706      | 1605      | 1635      | 1.952      |
|-------------------------------------------------|--------------|-----------|-----------|------------|------------|------------|-----------|-----------|-----------|------------|
| Zbtb18                                          | 2 < FC > 1.2 | cluster_4 | cluster_3 | 595        | 588        | 588        | 904       | 894       | 874       | 1.509      |
| Zfp593                                          | 2 < FC > 1.2 | cluster_4 | cluster_3 | 225        | 285        | 283        | 336       | 516       | 491       | 1.693      |
| 2<FC>1.2, H3K27me3 cluster 4, H3K4me3 cluster 4 |              |           |           |            |            |            |           |           |           |            |
| id                                              | RNAseq       | H3K27me3  | H3K4me3   | norm.dms01 | norm.dms02 | norm.dms03 | norm.epz1 | norm.epz2 | norm.epz3 | FoldChange |
| 2010204K13R                                     | 2 < FC > 1.2 | cluster_4 | cluster_4 | 79         | 104        | 102        | 146       | 184       | 152       | 1.686      |
| 2900026A02R                                     | 2 < FC > 1.2 | cluster_4 | cluster_4 | 2785       | 3058       | 3053       | 3381      | 3890      | 3742      | 1.238      |
| 3830403N18R                                     | 2 < FC > 1.2 | cluster_4 | cluster_4 | 79         | 110        | 78         | 213       | 118       | 175       | 1.898      |
| Aaas                                            | 2 < FC > 1.2 | cluster_4 | cluster_4 | 3041       | 3030       | 3567       | 3943      | 4125      | 4098      | 1.262      |
| Abr                                             | 2 < FC > 1.2 | cluster_4 | cluster_4 | 3714       | 4070       | 4166       | 5123      | 4981      | 5336      | 1.292      |
| Akap6                                           | 2 < FC > 1.2 | cluster_4 | cluster_4 | 1206       | 1316       | 1063       | 1917      | 1827      | 1829      | 1.555      |
| Akirin1                                         | 2 < FC > 1.2 | cluster_4 | cluster_4 | 1946       | 1838       | 1682       | 2391      | 2117      | 2448      | 1.273      |
| Aldh1l2                                         | 2 < FC > 1.2 | cluster_4 | cluster_4 | 5042       | 4687       | 4399       | 7202      | 6432      | 6519      | 1.427      |
| Angptl2                                         | 2 < FC > 1.2 | cluster_4 | cluster_4 | 4485       | 5010       | 5449       | 7166      | 7444      | 6897      | 1.439      |
| Ank2                                            | 2 < FC > 1.2 | cluster_4 | cluster_4 | 958        | 898        | 874        | 1309      | 1208      | 1425      | 1.444      |
| Anxa8                                           | 2 < FC > 1.2 | cluster_4 | cluster_4 | 2072       | 1818       | 1910       | 2445      | 2736      | 2480      | 1.321      |
| Arfgap3                                         | 2 < FC > 1.2 | cluster_4 | cluster_4 | 3702       | 4012       | 4068       | 4997      | 5263      | 4769      | 1.276      |
| Arhgap32                                        | 2 < FC > 1.2 | cluster_4 | cluster_4 | 637        | 643        | 555        | 1008      | 831       | 920       | 1.504      |
| Arhgap44                                        | 2 < FC > 1.2 | cluster_4 | cluster_4 | 226        | 249        | 298        | 491       | 451       | 450       | 1.798      |
| Arhgef28                                        | 2 < FC > 1.2 | cluster_4 | cluster_4 | 891        | 827        | 921        | 1128      | 1107      | 1134      | 1.277      |
| Arl4a                                           | 2 < FC > 1.2 | cluster_4 | cluster_4 | 157        | 90         | 126        | 192       | 222       | 235       | 1.745      |
| Armxc6                                          | 2 < FC > 1.2 | cluster_4 | cluster_4 | 144        | 112        | 120        | 192       | 255       | 292       | 1.97       |
| Asns                                            | 2 < FC > 1.2 | cluster_4 | cluster_4 | 6044       | 5520       | 5030       | 8924      | 7816      | 8696      | 1.533      |
| Atp1a1                                          | 2 < FC > 1.2 | cluster_4 | cluster_4 | 8063       | 9319       | 9880       | 12884     | 13566     | 12918     | 1.444      |
| Atp2b4                                          | 2 < FC > 1.2 | cluster_4 | cluster_4 | 2692       | 2665       | 2862       | 4965      | 4781      | 5070      | 1.802      |
| Aven                                            | 2 < FC > 1.2 | cluster_4 | cluster_4 | 568        | 618        | 605        | 925       | 813       | 708       | 1.365      |
| BC017158                                        | 2 < FC > 1.2 | cluster_4 | cluster_4 | 493        | 705        | 780        | 830       | 1042      | 1099      | 1.5        |
| Bcat1                                           | 2 < FC > 1.2 | cluster_4 | cluster_4 | 5653       | 5621       | 5277       | 7142      | 6639      | 6827      | 1.245      |
| Blzf1                                           | 2 < FC > 1.2 | cluster_4 | cluster_4 | 1845       | 1604       | 1440       | 2256      | 1880      | 2312      | 1.319      |
| Bmp1                                            | 2 < FC > 1.2 | cluster_4 | cluster_4 | 3354       | 4297       | 5515       | 6345      | 7562      | 7040      | 1.591      |
| Camk2a                                          | 2 < FC > 1.2 | cluster_4 | cluster_4 | 259        | 317        | 298        | 499       | 492       | 410       | 1.601      |
| Capn6                                           | 2 < FC > 1.2 | cluster_4 | cluster_4 | 16023      | 12019      | 11324      | 19664     | 17001     | 17731     | 1.382      |
| Car13                                           | 2 < FC > 1.2 | cluster_4 | cluster_4 | 1304       | 1134       | 1079       | 1527      | 1501      | 1643      | 1.329      |
| Ccnd1                                           | 2 < FC > 1.2 | cluster_4 | cluster_4 | 15285      | 16978      | 17886      | 23546     | 23755     | 24115     | 1.424      |
| Cd276                                           | 2 < FC > 1.2 | cluster_4 | cluster_4 | 3087       | 3387       | 3572       | 4270      | 4492      | 4132      | 1.283      |
| Cdc42ep3                                        | 2 < FC > 1.2 | cluster_4 | cluster_4 | 4774       | 4071       | 3851       | 6770      | 6350      | 6477      | 1.544      |
| Cdh2                                            | 2 < FC > 1.2 | cluster_4 | cluster_4 | 5562       | 5248       | 4836       | 6442      | 6561      | 6148      | 1.224      |
| Cdr2                                            | 2 < FC > 1.2 | cluster_4 | cluster_4 | 2403       | 2136       | 2082       | 3533      | 3387      | 3392      | 1.558      |
| Cemip                                           | 2 < FC > 1.2 | cluster_4 | cluster_4 | 8388       | 8104       | 7541       | 11102     | 9487      | 9866      | 1.267      |
| Cerk                                            | 2 < FC > 1.2 | cluster_4 | cluster_4 | 1003       | 1128       | 1120       | 1411      | 1458      | 1498      | 1.343      |
| Cfh                                             | 2 < FC > 1.2 | cluster_4 | cluster_4 | 2249       | 1907       | 1541       | 3308      | 2721      | 2922      | 1.572      |
| Chst15                                          | 2 < FC > 1.2 | cluster_4 | cluster_4 | 3977       | 4162       | 3670       | 5503      | 4839      | 4882      | 1.289      |
| Cmtm4                                           | 2 < FC > 1.2 | cluster_4 | cluster_4 | 8231       | 7524       | 7600       | 10191     | 8835      | 9784      | 1.234      |
| Cnppd1                                          | 2 < FC > 1.2 | cluster_4 | cluster_4 | 1926       | 2016       | 2358       | 2776      | 2724      | 2612      | 1.287      |
| Cthrc1                                          | 2 < FC > 1.2 | cluster_4 | cluster_4 | 547        | 455        | 466        | 786       | 749       | 811       | 1.6        |
| Cxadr                                           | 2 < FC > 1.2 | cluster_4 | cluster_4 | 185        | 147        | 157        | 350       | 278       | 241       | 1.781      |
| D1Erttd622e                                     | 2 < FC > 1.2 | cluster_4 | cluster_4 | 312        | 302        | 312        | 510       | 504       | 578       | 1.718      |
| Ddit4l                                          | 2 < FC > 1.2 | cluster_4 | cluster_4 | 714        | 633        | 541        | 1052      | 925       | 803       | 1.474      |
| Dgat2                                           | 2 < FC > 1.2 | cluster_4 | cluster_4 | 75         | 92         | 100        | 141       | 221       | 138       | 1.873      |
| Dhx32                                           | 2 < FC > 1.2 | cluster_4 | cluster_4 | 905        | 919        | 942        | 1106      | 1210      | 1231      | 1.283      |

|          |              |           |           |       |       |       |       |       |       |       |
|----------|--------------|-----------|-----------|-------|-------|-------|-------|-------|-------|-------|
| Dlc1     | 2 < FC > 1.2 | cluster_4 | cluster_4 | 3811  | 4268  | 4132  | 5522  | 5622  | 5412  | 1.356 |
| Dtx4     | 2 < FC > 1.2 | cluster_4 | cluster_4 | 650   | 678   | 645   | 1165  | 1184  | 1108  | 1.752 |
| Dusp8    | 2 < FC > 1.2 | cluster_4 | cluster_4 | 501   | 407   | 422   | 912   | 806   | 798   | 1.894 |
| Dyrk3    | 2 < FC > 1.2 | cluster_4 | cluster_4 | 73    | 96    | 86    | 153   | 163   | 162   | 1.872 |
| Fam101b  | 2 < FC > 1.2 | cluster_4 | cluster_4 | 2729  | 2705  | 2780  | 4855  | 4687  | 5162  | 1.79  |
| Fam189a2 | 2 < FC > 1.2 | cluster_4 | cluster_4 | 940   | 1071  | 1055  | 1263  | 1426  | 1324  | 1.308 |
| Fam198b  | 2 < FC > 1.2 | cluster_4 | cluster_4 | 682   | 541   | 523   | 1281  | 893   | 1023  | 1.832 |
| Fam3c    | 2 < FC > 1.2 | cluster_4 | cluster_4 | 4259  | 3650  | 3443  | 5614  | 5076  | 5567  | 1.432 |
| Fam46a   | 2 < FC > 1.2 | cluster_4 | cluster_4 | 2092  | 1741  | 1667  | 3306  | 2751  | 3155  | 1.675 |
| Figl     | 2 < FC > 1.2 | cluster_4 | cluster_4 | 250   | 159   | 257   | 405   | 326   | 412   | 1.714 |
| Fmnl3    | 2 < FC > 1.2 | cluster_4 | cluster_4 | 3752  | 4249  | 4399  | 6344  | 7134  | 6381  | 1.601 |
| Frs2     | 2 < FC > 1.2 | cluster_4 | cluster_4 | 3701  | 3734  | 3263  | 5152  | 4335  | 5014  | 1.356 |
| Fzd5     | 2 < FC > 1.2 | cluster_4 | cluster_4 | 1116  | 1219  | 1180  | 1930  | 1876  | 2019  | 1.656 |
| Garem    | 2 < FC > 1.2 | cluster_4 | cluster_4 | 159   | 186   | 182   | 302   | 266   | 262   | 1.575 |
| Gnb4     | 2 < FC > 1.2 | cluster_4 | cluster_4 | 462   | 421   | 382   | 604   | 593   | 570   | 1.398 |
| Gne      | 2 < FC > 1.2 | cluster_4 | cluster_4 | 2072  | 2357  | 2779  | 3413  | 4032  | 3801  | 1.559 |
| Golim4   | 2 < FC > 1.2 | cluster_4 | cluster_4 | 5578  | 5267  | 5096  | 6949  | 6600  | 6022  | 1.228 |
| Gper1    | 2 < FC > 1.2 | cluster_4 | cluster_4 | 516   | 594   | 588   | 880   | 1067  | 841   | 1.642 |
| Gpr153   | 2 < FC > 1.2 | cluster_4 | cluster_4 | 1614  | 1811  | 1998  | 2751  | 3089  | 2757  | 1.585 |
| Gpr180   | 2 < FC > 1.2 | cluster_4 | cluster_4 | 1466  | 1638  | 1792  | 1982  | 2143  | 2173  | 1.286 |
| Gprc5b   | 2 < FC > 1.2 | cluster_4 | cluster_4 | 1321  | 1459  | 1304  | 2431  | 2153  | 2391  | 1.708 |
| Gpsm2    | 2 < FC > 1.2 | cluster_4 | cluster_4 | 5713  | 5133  | 4627  | 7598  | 6618  | 7004  | 1.372 |
| Grb14    | 2 < FC > 1.2 | cluster_4 | cluster_4 | 215   | 198   | 176   | 359   | 283   | 337   | 1.664 |
| Gtf2ird1 | 2 < FC > 1.2 | cluster_4 | cluster_4 | 1658  | 1775  | 1863  | 2601  | 2933  | 2529  | 1.522 |
| Hip1     | 2 < FC > 1.2 | cluster_4 | cluster_4 | 5571  | 6600  | 6343  | 7680  | 8000  | 7516  | 1.253 |
| Hipk2    | 2 < FC > 1.2 | cluster_4 | cluster_4 | 484   | 552   | 584   | 907   | 764   | 871   | 1.568 |
| Hk2      | 2 < FC > 1.2 | cluster_4 | cluster_4 | 1642  | 1801  | 1828  | 2328  | 2419  | 2444  | 1.364 |
| Hmcn1    | 2 < FC > 1.2 | cluster_4 | cluster_4 | 198   | 134   | 141   | 356   | 258   | 249   | 1.831 |
| Hspa4l   | 2 < FC > 1.2 | cluster_4 | cluster_4 | 260   | 250   | 192   | 457   | 397   | 364   | 1.737 |
| Htra3    | 2 < FC > 1.2 | cluster_4 | cluster_4 | 203   | 152   | 247   | 334   | 333   | 384   | 1.743 |
| Impdh1   | 2 < FC > 1.2 | cluster_4 | cluster_4 | 2623  | 3233  | 4235  | 4288  | 5821  | 5052  | 1.502 |
| Jade1    | 2 < FC > 1.2 | cluster_4 | cluster_4 | 522   | 580   | 461   | 647   | 833   | 673   | 1.378 |
| Jph2     | 2 < FC > 1.2 | cluster_4 | cluster_4 | 2253  | 3050  | 3215  | 3800  | 4372  | 4089  | 1.439 |
| Kcnk2    | 2 < FC > 1.2 | cluster_4 | cluster_4 | 204   | 176   | 190   | 355   | 299   | 345   | 1.752 |
| Kif21a   | 2 < FC > 1.2 | cluster_4 | cluster_4 | 1023  | 953   | 737   | 1298  | 1279  | 1100  | 1.357 |
| Klf10    | 2 < FC > 1.2 | cluster_4 | cluster_4 | 689   | 645   | 731   | 963   | 970   | 995   | 1.417 |
| Klf13    | 2 < FC > 1.2 | cluster_4 | cluster_4 | 2611  | 2752  | 2908  | 3310  | 3521  | 3352  | 1.231 |
| Klrg2    | 2 < FC > 1.2 | cluster_4 | cluster_4 | 137   | 150   | 166   | 300   | 267   | 261   | 1.825 |
| Kremen1  | 2 < FC > 1.2 | cluster_4 | cluster_4 | 5866  | 7088  | 7701  | 9282  | 9610  | 9017  | 1.351 |
| Ldlrap1  | 2 < FC > 1.2 | cluster_4 | cluster_4 | 1457  | 1873  | 2051  | 2460  | 3062  | 3019  | 1.587 |
| Lgalsl   | 2 < FC > 1.2 | cluster_4 | cluster_4 | 3109  | 2914  | 2507  | 3992  | 3421  | 3713  | 1.305 |
| Lox      | 2 < FC > 1.2 | cluster_4 | cluster_4 | 19208 | 17680 | 15495 | 26760 | 22722 | 24502 | 1.412 |
| Lrig1    | 2 < FC > 1.2 | cluster_4 | cluster_4 | 635   | 734   | 762   | 1357  | 1320  | 1308  | 1.869 |
| Lrrc1    | 2 < FC > 1.2 | cluster_4 | cluster_4 | 218   | 240   | 240   | 419   | 355   | 350   | 1.61  |
| Lrrc8b   | 2 < FC > 1.2 | cluster_4 | cluster_4 | 128   | 162   | 152   | 212   | 240   | 212   | 1.5   |
| Ltv1     | 2 < FC > 1.2 | cluster_4 | cluster_4 | 3781  | 3245  | 2902  | 4548  | 4347  | 4027  | 1.302 |
| Maged2   | 2 < FC > 1.2 | cluster_4 | cluster_4 | 7172  | 8426  | 9896  | 9948  | 12608 | 11297 | 1.328 |
| Maml3    | 2 < FC > 1.2 | cluster_4 | cluster_4 | 342   | 442   | 516   | 640   | 705   | 666   | 1.546 |
| Map1b    | 2 < FC > 1.2 | cluster_4 | cluster_4 | 9570  | 9403  | 8727  | 16816 | 14038 | 16191 | 1.698 |
| Map3k1   | 2 < FC > 1.2 | cluster_4 | cluster_4 | 120   | 152   | 150   | 249   | 241   | 264   | 1.785 |

|          |              |           |           |       |       |       |       |       |       |       |
|----------|--------------|-----------|-----------|-------|-------|-------|-------|-------|-------|-------|
| Mapk6    | 2 < FC > 1.2 | cluster_4 | cluster_4 | 2810  | 2898  | 2621  | 3680  | 3226  | 3593  | 1.26  |
| Mb21d2   | 2 < FC > 1.2 | cluster_4 | cluster_4 | 251   | 242   | 263   | 411   | 436   | 424   | 1.682 |
| Me1      | 2 < FC > 1.2 | cluster_4 | cluster_4 | 3496  | 3336  | 2732  | 4636  | 4149  | 4441  | 1.383 |
| Mical3   | 2 < FC > 1.2 | cluster_4 | cluster_4 | 2204  | 2671  | 3046  | 4041  | 4591  | 4128  | 1.611 |
| Mpz11    | 2 < FC > 1.2 | cluster_4 | cluster_4 | 2319  | 2066  | 2076  | 2635  | 2757  | 2631  | 1.242 |
| Mtmr10   | 2 < FC > 1.2 | cluster_4 | cluster_4 | 1589  | 1523  | 1539  | 2009  | 1820  | 1927  | 1.238 |
| Mtus1    | 2 < FC > 1.2 | cluster_4 | cluster_4 | 2196  | 2083  | 1830  | 2885  | 2671  | 2642  | 1.342 |
| Net1     | 2 < FC > 1.2 | cluster_4 | cluster_4 | 820   | 774   | 859   | 1324  | 1481  | 1448  | 1.734 |
| Nfil3    | 2 < FC > 1.2 | cluster_4 | cluster_4 | 956   | 1053  | 1091  | 1343  | 1367  | 1241  | 1.274 |
| Nkd2     | 2 < FC > 1.2 | cluster_4 | cluster_4 | 313   | 247   | 318   | 518   | 519   | 396   | 1.632 |
| Nrbf2    | 2 < FC > 1.2 | cluster_4 | cluster_4 | 709   | 726   | 643   | 982   | 909   | 819   | 1.305 |
| Nsf      | 2 < FC > 1.2 | cluster_4 | cluster_4 | 4519  | 4637  | 4546  | 5738  | 5698  | 5573  | 1.241 |
| Nuak1    | 2 < FC > 1.2 | cluster_4 | cluster_4 | 4595  | 4769  | 4763  | 8691  | 8912  | 9134  | 1.892 |
| Olfml1   | 2 < FC > 1.2 | cluster_4 | cluster_4 | 137   | 134   | 148   | 304   | 235   | 207   | 1.776 |
| Optn     | 2 < FC > 1.2 | cluster_4 | cluster_4 | 1720  | 1748  | 1690  | 2192  | 2310  | 2222  | 1.304 |
| Pald1    | 2 < FC > 1.2 | cluster_4 | cluster_4 | 1391  | 1746  | 2012  | 2902  | 3362  | 2924  | 1.784 |
| Papss2   | 2 < FC > 1.2 | cluster_4 | cluster_4 | 4033  | 3692  | 3574  | 6414  | 5711  | 5925  | 1.598 |
| Pdia5    | 2 < FC > 1.2 | cluster_4 | cluster_4 | 1693  | 1842  | 1937  | 3016  | 2885  | 2867  | 1.601 |
| Pdzd4    | 2 < FC > 1.2 | cluster_4 | cluster_4 | 1218  | 1222  | 1521  | 1723  | 1868  | 1827  | 1.367 |
| Pfkfb3   | 2 < FC > 1.2 | cluster_4 | cluster_4 | 1007  | 1069  | 1046  | 1567  | 1504  | 1519  | 1.47  |
| Plcd1    | 2 < FC > 1.2 | cluster_4 | cluster_4 | 1442  | 1982  | 2332  | 3272  | 4240  | 3472  | 1.907 |
| Polr3d   | 2 < FC > 1.2 | cluster_4 | cluster_4 | 879   | 776   | 1039  | 1182  | 1479  | 1292  | 1.468 |
| Prdx6    | 2 < FC > 1.2 | cluster_4 | cluster_4 | 4448  | 4287  | 4327  | 5450  | 5228  | 5288  | 1.222 |
| Ptch1    | 2 < FC > 1.2 | cluster_4 | cluster_4 | 542   | 570   | 680   | 1125  | 1141  | 1025  | 1.835 |
| Ptgr     | 2 < FC > 1.2 | cluster_4 | cluster_4 | 6689  | 6015  | 5192  | 9118  | 7477  | 8490  | 1.402 |
| Ptk2b    | 2 < FC > 1.2 | cluster_4 | cluster_4 | 389   | 484   | 414   | 635   | 626   | 597   | 1.442 |
| Ptprm    | 2 < FC > 1.2 | cluster_4 | cluster_4 | 2352  | 2567  | 2599  | 3356  | 3155  | 3383  | 1.316 |
| Pxdc1    | 2 < FC > 1.2 | cluster_4 | cluster_4 | 885   | 984   | 970   | 1637  | 1745  | 1629  | 1.765 |
| Pxylp1   | 2 < FC > 1.2 | cluster_4 | cluster_4 | 1668  | 1774  | 1690  | 2889  | 2966  | 2884  | 1.703 |
| Rabgap1l | 2 < FC > 1.2 | cluster_4 | cluster_4 | 1107  | 972   | 981   | 1477  | 1294  | 1389  | 1.36  |
| Raph1    | 2 < FC > 1.2 | cluster_4 | cluster_4 | 4558  | 4091  | 3590  | 7948  | 6678  | 7624  | 1.818 |
| Rasa3    | 2 < FC > 1.2 | cluster_4 | cluster_4 | 3730  | 3919  | 4020  | 5897  | 6652  | 6084  | 1.597 |
| Rassf3   | 2 < FC > 1.2 | cluster_4 | cluster_4 | 1594  | 1544  | 1551  | 2195  | 2114  | 2328  | 1.415 |
| Reps2    | 2 < FC > 1.2 | cluster_4 | cluster_4 | 359   | 339   | 288   | 616   | 531   | 617   | 1.792 |
| Rftn2    | 2 < FC > 1.2 | cluster_4 | cluster_4 | 2295  | 2226  | 2222  | 3018  | 3073  | 2747  | 1.311 |
| Rfx3     | 2 < FC > 1.2 | cluster_4 | cluster_4 | 429   | 431   | 382   | 623   | 564   | 553   | 1.402 |
| Rgl1     | 2 < FC > 1.2 | cluster_4 | cluster_4 | 823   | 877   | 816   | 1339  | 1255  | 1275  | 1.538 |
| Rras2    | 2 < FC > 1.2 | cluster_4 | cluster_4 | 2190  | 1850  | 1628  | 3262  | 2821  | 3440  | 1.681 |
| Rrbp1    | 2 < FC > 1.2 | cluster_4 | cluster_4 | 21350 | 26403 | 30205 | 32133 | 39325 | 34855 | 1.364 |
| Runx1    | 2 < FC > 1.2 | cluster_4 | cluster_4 | 446   | 439   | 478   | 666   | 571   | 656   | 1.387 |
| Runx2    | 2 < FC > 1.2 | cluster_4 | cluster_4 | 11267 | 10994 | 10500 | 17250 | 15631 | 17078 | 1.525 |
| Scara3   | 2 < FC > 1.2 | cluster_4 | cluster_4 | 6451  | 6817  | 6991  | 8459  | 8482  | 8318  | 1.247 |
| Sdc4     | 2 < FC > 1.2 | cluster_4 | cluster_4 | 4566  | 5163  | 4851  | 6128  | 6478  | 6428  | 1.305 |
| Sec13    | 2 < FC > 1.2 | cluster_4 | cluster_4 | 14044 | 15615 | 17466 | 19412 | 22284 | 19999 | 1.309 |
| Sec24a   | 2 < FC > 1.2 | cluster_4 | cluster_4 | 2509  | 2481  | 2077  | 3189  | 2921  | 3123  | 1.307 |
| Sec31a   | 2 < FC > 1.2 | cluster_4 | cluster_4 | 17881 | 19468 | 19218 | 23177 | 23454 | 22193 | 1.217 |
| Sema3e   | 2 < FC > 1.2 | cluster_4 | cluster_4 | 240   | 253   | 194   | 355   | 325   | 311   | 1.444 |
| Sema4b   | 2 < FC > 1.2 | cluster_4 | cluster_4 | 605   | 736   | 784   | 953   | 1132  | 1096  | 1.496 |
| Serpine1 | 2 < FC > 1.2 | cluster_4 | cluster_4 | 456   | 486   | 510   | 671   | 703   | 776   | 1.48  |
| Sertad4  | 2 < FC > 1.2 | cluster_4 | cluster_4 | 1579  | 1448  | 1463  | 2419  | 2260  | 2313  | 1.558 |



|            |              |           |           |        |        |        |        |        |        |       |
|------------|--------------|-----------|-----------|--------|--------|--------|--------|--------|--------|-------|
| Sipa1l2    | 2 < FC > 1.2 | cluster_4 | cluster_4 | 260    | 263    | 295    | 535    | 496    | 487    | 1.854 |
| Sipa1l3    | 2 < FC > 1.2 | cluster_4 | cluster_4 | 1178   | 1882   | 2353   | 2459   | 3140   | 2885   | 1.567 |
| Slc17a9    | 2 < FC > 1.2 | cluster_4 | cluster_4 | 95     | 129    | 102    | 189    | 226    | 142    | 1.707 |
| Slc1a4     | 2 < FC > 1.2 | cluster_4 | cluster_4 | 4359   | 4791   | 4422   | 5913   | 5748   | 5997   | 1.301 |
| Slc22a15   | 2 < FC > 1.2 | cluster_4 | cluster_4 | 200    | 250    | 236    | 302    | 414    | 407    | 1.634 |
| Slc25a5    | 2 < FC > 1.2 | cluster_4 | cluster_4 | 10976  | 11356  | 12052  | 14068  | 14117  | 13762  | 1.22  |
| Slc39a11   | 2 < FC > 1.2 | cluster_4 | cluster_4 | 1246   | 1262   | 1539   | 1665   | 1946   | 1749   | 1.324 |
| Slc39a13   | 2 < FC > 1.2 | cluster_4 | cluster_4 | 2556   | 3487   | 4026   | 4606   | 5341   | 4778   | 1.462 |
| Slc39a14   | 2 < FC > 1.2 | cluster_4 | cluster_4 | 2505   | 2333   | 2386   | 3108   | 2932   | 3082   | 1.263 |
| Slc41a2    | 2 < FC > 1.2 | cluster_4 | cluster_4 | 2232   | 2220   | 1985   | 3442   | 3021   | 3309   | 1.518 |
| Slc7a6os   | 2 < FC > 1.2 | cluster_4 | cluster_4 | 1414   | 1374   | 1330   | 1783   | 1692   | 1688   | 1.254 |
| Smad1      | 2 < FC > 1.2 | cluster_4 | cluster_4 | 1066   | 1038   | 1038   | 1403   | 1349   | 1581   | 1.379 |
| Smad3      | 2 < FC > 1.2 | cluster_4 | cluster_4 | 3808   | 4339   | 3873   | 5198   | 4736   | 5052   | 1.247 |
| Smarca1    | 2 < FC > 1.2 | cluster_4 | cluster_4 | 278    | 302    | 251    | 497    | 533    | 486    | 1.824 |
| Smco4      | 2 < FC > 1.2 | cluster_4 | cluster_4 | 125    | 102    | 110    | 194    | 224    | 194    | 1.82  |
| Sox6       | 2 < FC > 1.2 | cluster_4 | cluster_4 | 2854   | 2998   | 2655   | 3763   | 3481   | 3804   | 1.299 |
| Sparc      | 2 < FC > 1.2 | cluster_4 | cluster_4 | 246807 | 250707 | 253390 | 338559 | 339532 | 329220 | 1.341 |
| Spef1      | 2 < FC > 1.2 | cluster_4 | cluster_4 | 183    | 188    | 169    | 257    | 256    | 304    | 1.512 |
| Spen       | 2 < FC > 1.2 | cluster_4 | cluster_4 | 1377   | 1798   | 2244   | 2296   | 2775   | 2544   | 1.404 |
| Spock2     | 2 < FC > 1.2 | cluster_4 | cluster_4 | 1715   | 2147   | 2148   | 2451   | 2838   | 2882   | 1.359 |
| Spry1      | 2 < FC > 1.2 | cluster_4 | cluster_4 | 243    | 256    | 251    | 507    | 483    | 428    | 1.889 |
| St6galnac6 | 2 < FC > 1.2 | cluster_4 | cluster_4 | 4660   | 5202   | 5686   | 6162   | 7014   | 6441   | 1.261 |
| Stk39      | 2 < FC > 1.2 | cluster_4 | cluster_4 | 1394   | 1328   | 1111   | 2314   | 2172   | 2419   | 1.802 |
| Tbrg1      | 2 < FC > 1.2 | cluster_4 | cluster_4 | 14054  | 13093  | 12983  | 17703  | 17189  | 17158  | 1.297 |
| Tead4      | 2 < FC > 1.2 | cluster_4 | cluster_4 | 253    | 217    | 303    | 354    | 408    | 402    | 1.504 |
| Tgfbi      | 2 < FC > 1.2 | cluster_4 | cluster_4 | 740    | 763    | 652    | 1393   | 1206   | 1302   | 1.811 |
| Tle1       | 2 < FC > 1.2 | cluster_4 | cluster_4 | 584    | 688    | 627    | 870    | 929    | 856    | 1.398 |
| Tle4       | 2 < FC > 1.2 | cluster_4 | cluster_4 | 326    | 342    | 344    | 526    | 499    | 424    | 1.431 |
| Tll1       | 2 < FC > 1.2 | cluster_4 | cluster_4 | 527    | 555    | 564    | 1042   | 897    | 870    | 1.706 |
| Tnc        | 2 < FC > 1.2 | cluster_4 | cluster_4 | 36676  | 39977  | 40793  | 73198  | 75957  | 72996  | 1.892 |
| Tnfaip2    | 2 < FC > 1.2 | cluster_4 | cluster_4 | 1880   | 2148   | 2407   | 2678   | 2972   | 2890   | 1.327 |
| Tnfrsf19   | 2 < FC > 1.2 | cluster_4 | cluster_4 | 9466   | 8591   | 8722   | 16899  | 17347  | 17584  | 1.936 |
| Tnfrsf23   | 2 < FC > 1.2 | cluster_4 | cluster_4 | 631    | 428    | 374    | 914    | 696    | 785    | 1.674 |
| Tnn        | 2 < FC > 1.2 | cluster_4 | cluster_4 | 1319   | 1408   | 1443   | 1862   | 1951   | 1985   | 1.39  |
| Trpm4      | 2 < FC > 1.2 | cluster_4 | cluster_4 | 600    | 863    | 1092   | 1174   | 1534   | 1338   | 1.583 |
| Trpv4      | 2 < FC > 1.2 | cluster_4 | cluster_4 | 503    | 691    | 897    | 811    | 1304   | 1256   | 1.611 |
| Ttll7      | 2 < FC > 1.2 | cluster_4 | cluster_4 | 553    | 507    | 391    | 849    | 640    | 743    | 1.539 |
| Vav2       | 2 < FC > 1.2 | cluster_4 | cluster_4 | 1071   | 1242   | 1326   | 1984   | 2167   | 2153   | 1.731 |
| Vegfa      | 2 < FC > 1.2 | cluster_4 | cluster_4 | 945    | 1082   | 1152   | 1542   | 1473   | 1551   | 1.435 |
| Vps37b     | 2 < FC > 1.2 | cluster_4 | cluster_4 | 191    | 336    | 368    | 450    | 606    | 488    | 1.723 |
| Xylb       | 2 < FC > 1.2 | cluster_4 | cluster_4 | 244    | 251    | 266    | 373    | 383    | 490    | 1.633 |
| Zbtb40     | 2 < FC > 1.2 | cluster_4 | cluster_4 | 749    | 1012   | 1101   | 1208   | 1460   | 1374   | 1.411 |
| Znrf3      | 2 < FC > 1.2 | cluster_4 | cluster_4 | 1081   | 1064   | 1080   | 1490   | 1303   | 1485   | 1.327 |
| Zswim6     | 2 < FC > 1.2 | cluster_4 | cluster_4 | 1030   | 1184   | 970    | 1361   | 1376   | 1505   | 1.332 |

**Table S4:** List of primers used in this study.

| <b>Gene</b> | <b>Forward</b>            | <b>Reverse</b>                |
|-------------|---------------------------|-------------------------------|
| Gapdh       | CATCACTGCCACCCAGAAGACTG   | ATGCCAGTGAGCTTCCCGTTCAG       |
| Alpl        | CCAGAAAGACACCTTGACTGTGG   | TCTTGTCCGTGTCGCTCACCAT        |
| Bglap       | GCAATAAGGTAGTGAACAGACTCC  | CCATAGATGCGTTTGTAGGCGG        |
| Runx2       | TCTGGAAAAAAGGAGGGACTATG   | GGTGCTCGGATCCCAAAGAA          |
| Ibsp        | GAATGGCCTGTGCTTTCTCG      | CCGGTACTTAAAGACCCCGTT         |
| Phex        | CAACGTTCCGCGGTCAATAC      | GTGTTGCTTGGTCCAGCTTC          |
| Phospho     | ATGAGCGGGTGTTTTCCAG       | ATCGAAGTCGAAGGTGAGGAG         |
| Gli1        | GGAAGTCCTATTCACGCCTTG     | CAACCTTCTTGCTCACACATGTAA      |
| Gli2        | TACCTCAACCCTGTGGATGC      | CTACCAGCGAGTTGGGAGAG          |
| Intergenic  | ATTTTGTGCTGCATAACCTCCT    | TAGCAACATCCTAAGCTGGACA        |
| Actb        | CGTATTAGGTCCATCTTGAGAGTAC | GCCACGATTATTGTAGGCGTGATCGTAGC |
| Neuro1      | TGGTCTCCTGAGTGATGTCG      | GCCGTACTTAAAGGGGTCCTG         |

**Table S5:** List of antibodies used in this study.

| <b>Antibody</b> | <b>Company</b>    | <b>CAS</b> |
|-----------------|-------------------|------------|
| H3K27me3        | Cell Sig          | 9733S      |
| Laminin B       | Santa Cruz        | sc-6216    |
| Ezh2            | Cell Signaling    | 5246s      |
| Total H3        | Millipore         | 05-928     |
| Runx2           | MBL International | 8G5        |
| Ezh1            | Abcam             | AB176115   |
| Suz12           | Cell Signaling    | 3737s      |
| H3K27Ac         | Millipore         | 07-360     |
| EDD             | Cell Signaling    | 516731     |
| H3K4me3         | Cell Signaling    | 9751S      |
| H3K9me3         | Cell Signaling    | 139695     |
| GAPDH           | Cell Signaling    | 51745      |
| B-catenin       | Cell Signaling    | 8814       |
| Rabbit IgG      | Cell Signaling    | 7074S      |
| mIgG BP-HRP     | Santa Cruz        | sc-516102  |
